# Supplementary material for: Genetic Characterization of Rat Hepatic Stellate Cell Line PAV-1
Source: MDPI journal article supplement (doi:10.3390/cells12121603), 2023-06-11

Chromosome 1

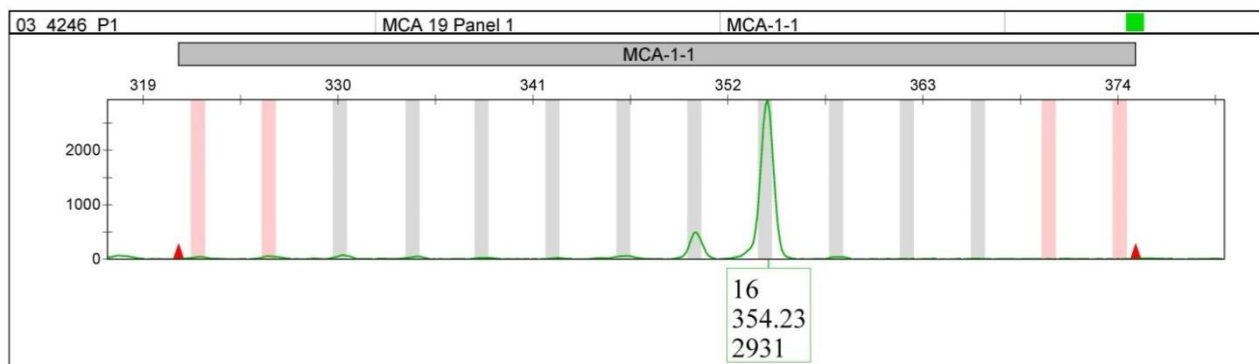

Chromosome 1

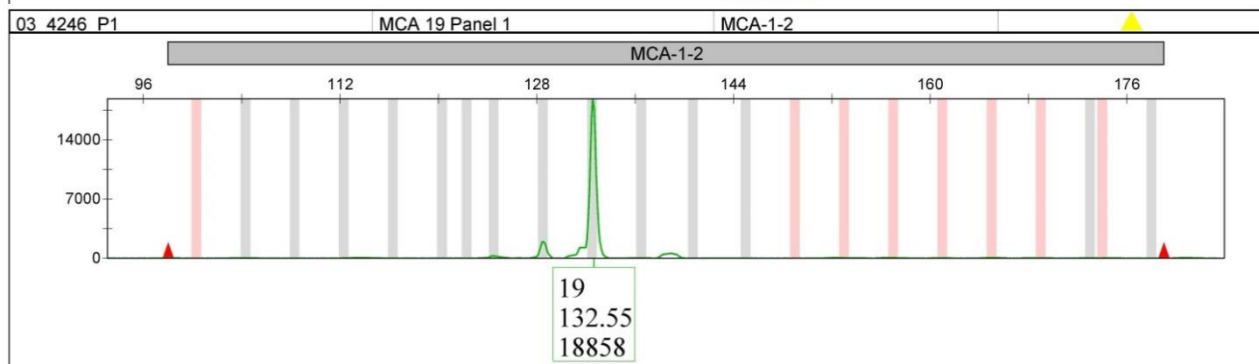

Chromosome 2

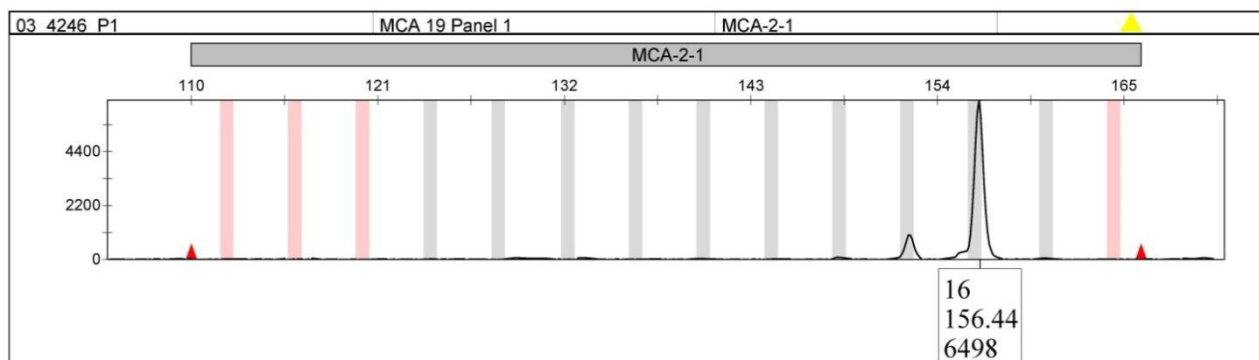

Chromosome 3

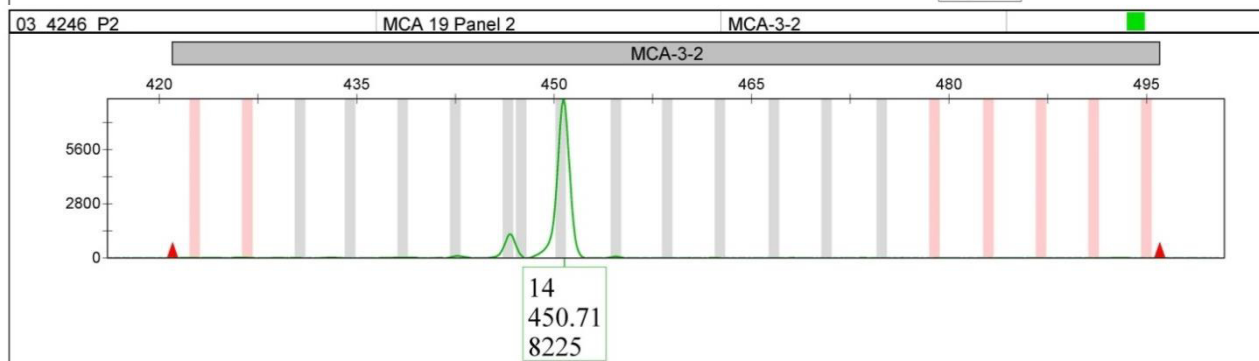

Chromosome 4

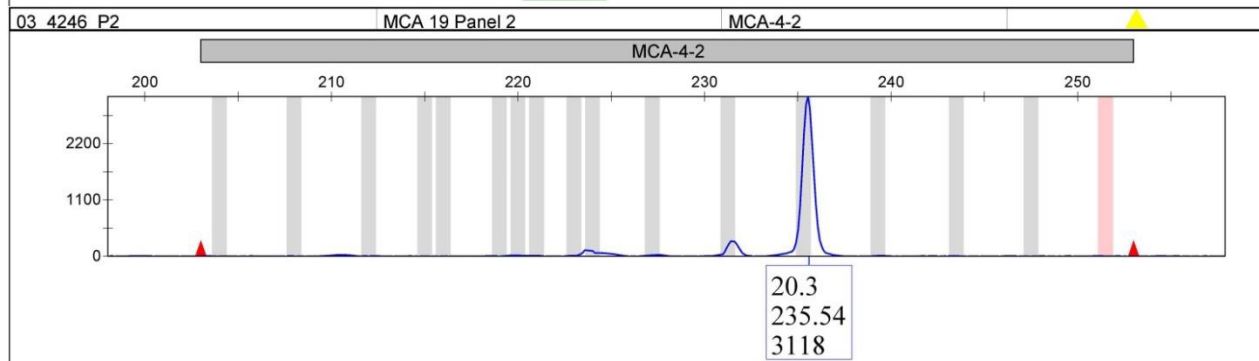

Chromosome 5

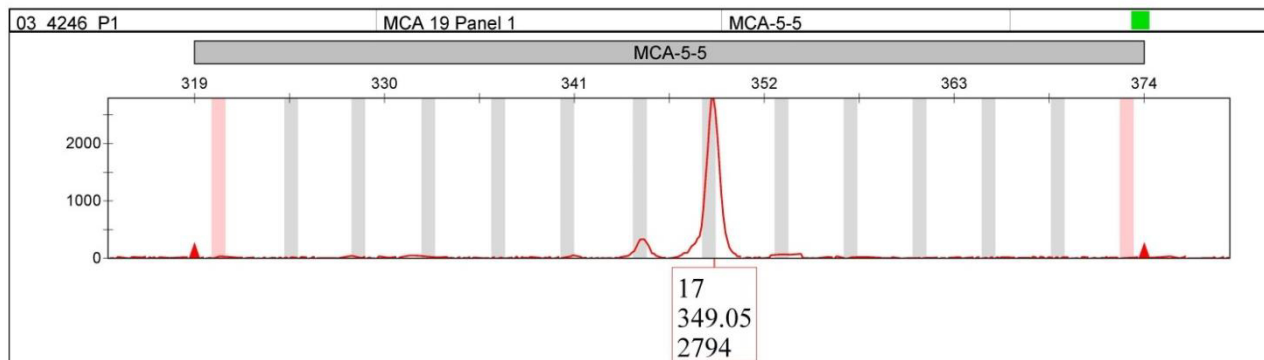

Chromosome 6

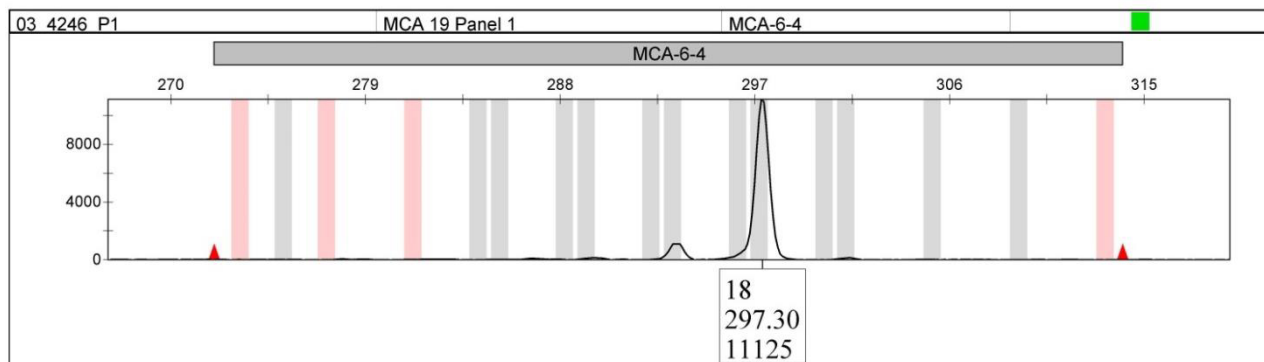

Chromosome 6

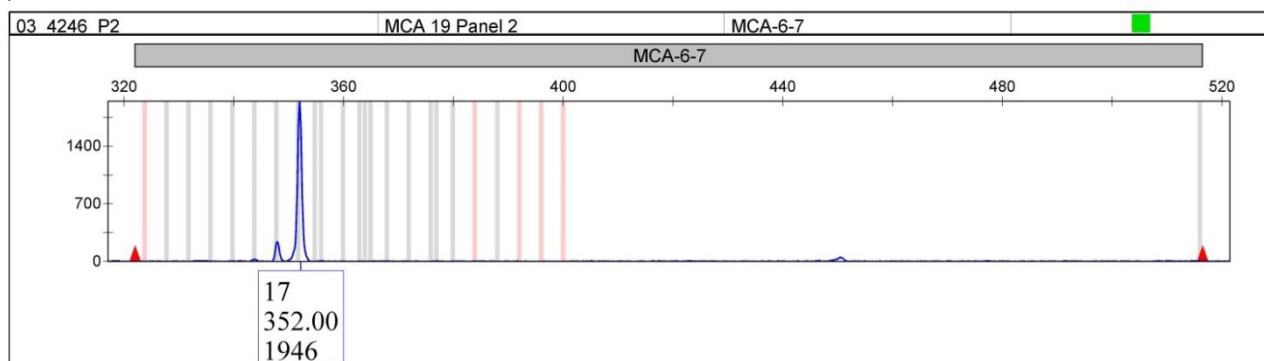

Chromosome 7

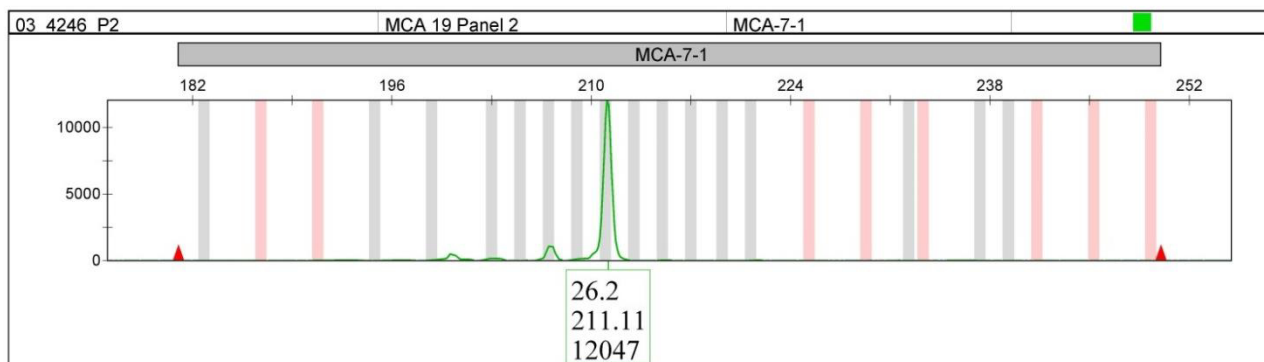

Chromosome 8

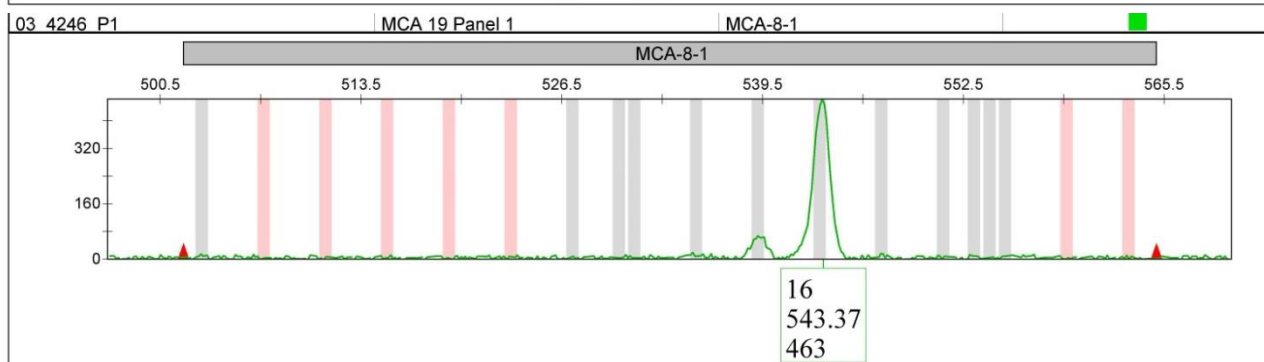

Chromosome 9

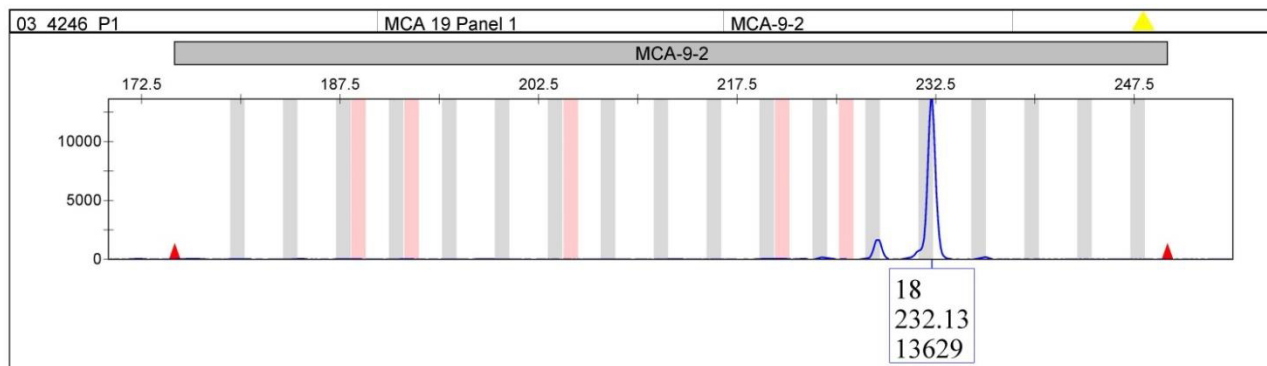

Chromosome 11

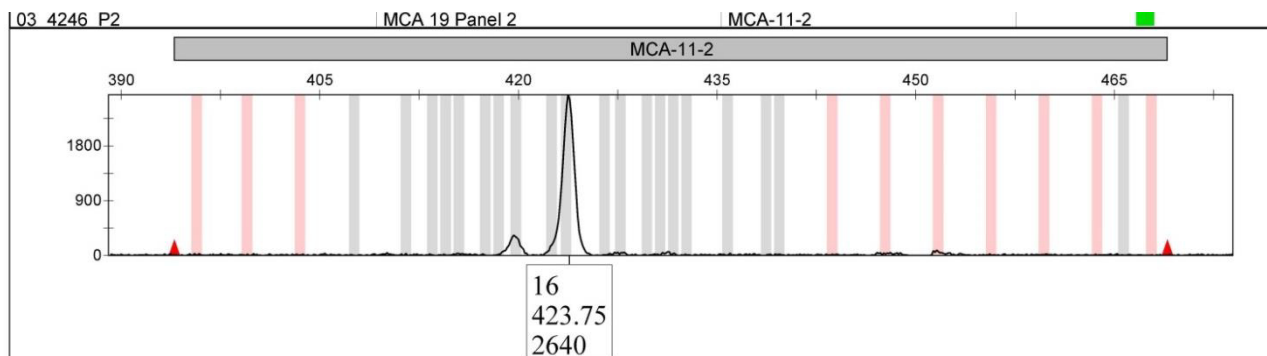

Chromosome 12

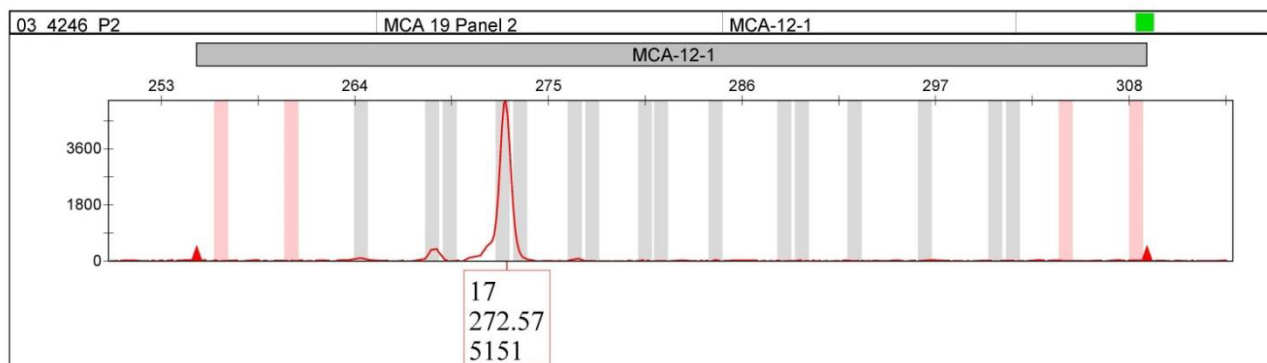

Chromosome 13

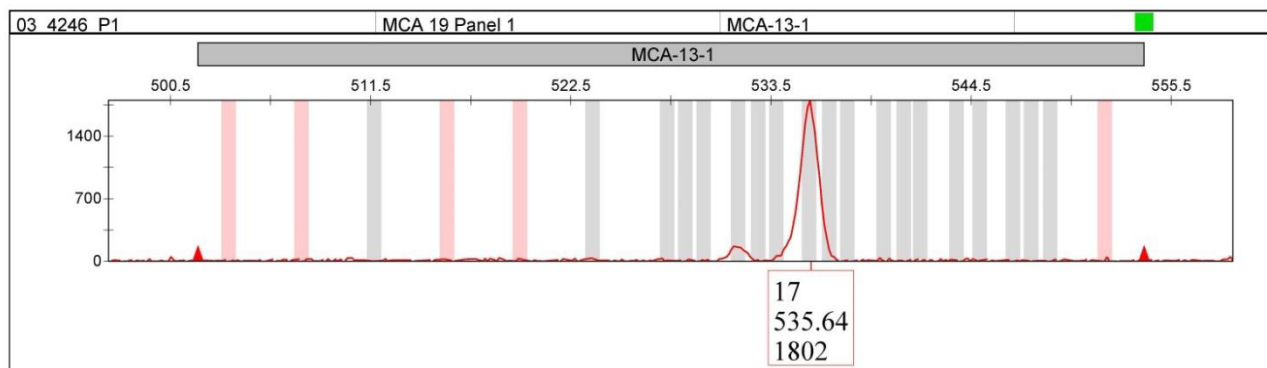

Chromosome 15

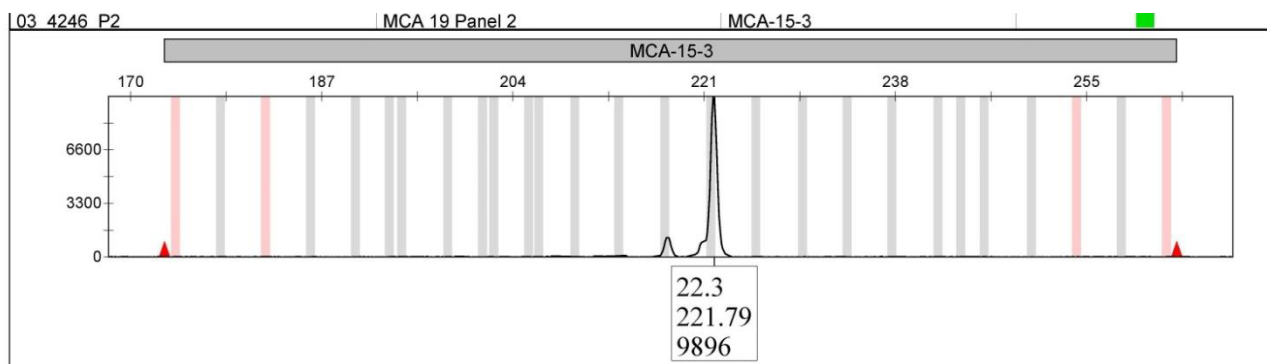

# Chromosome 17

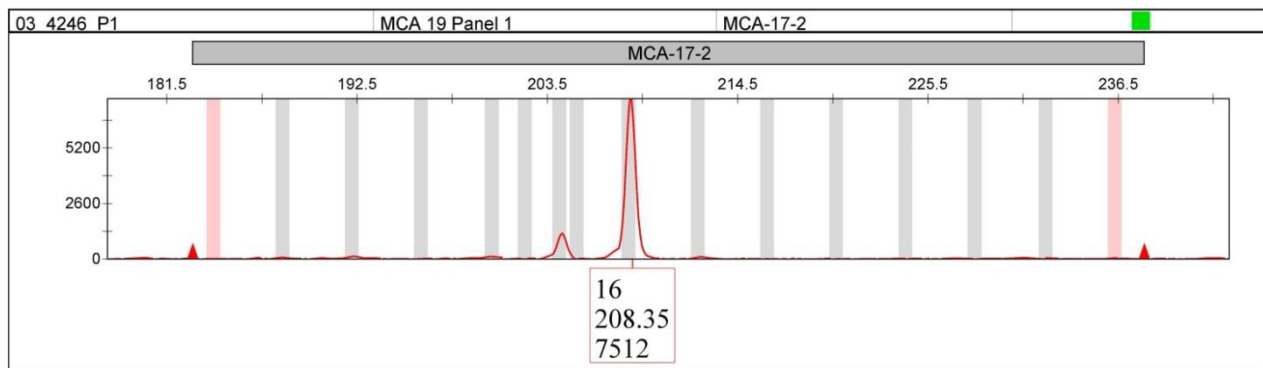

# Chromosome 18

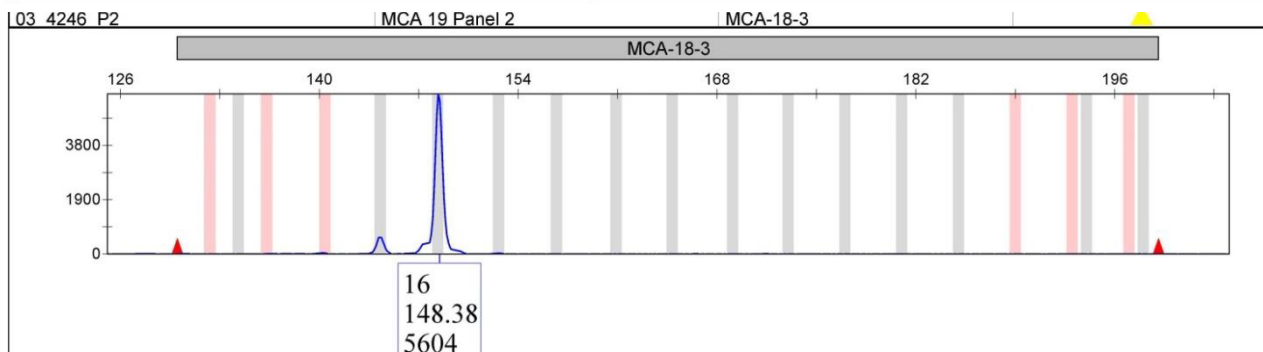

# Chromosome 19

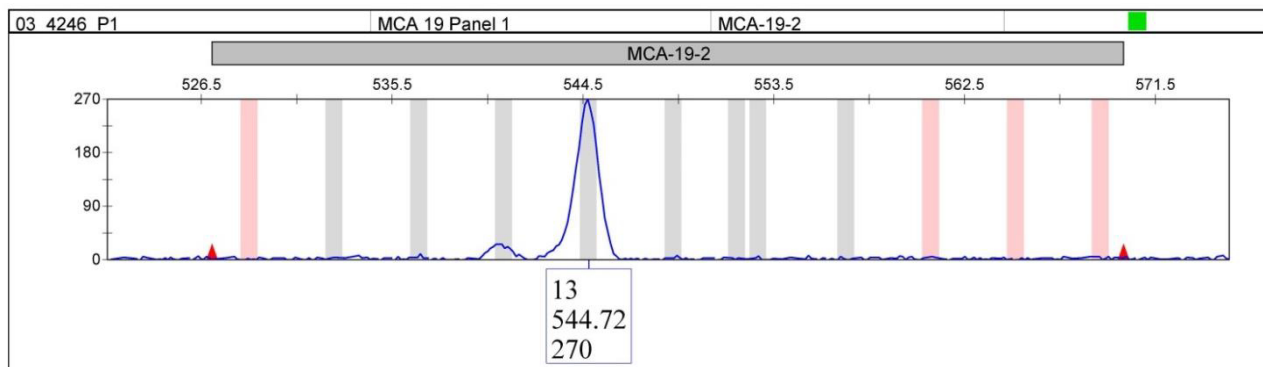

# Chromosome X

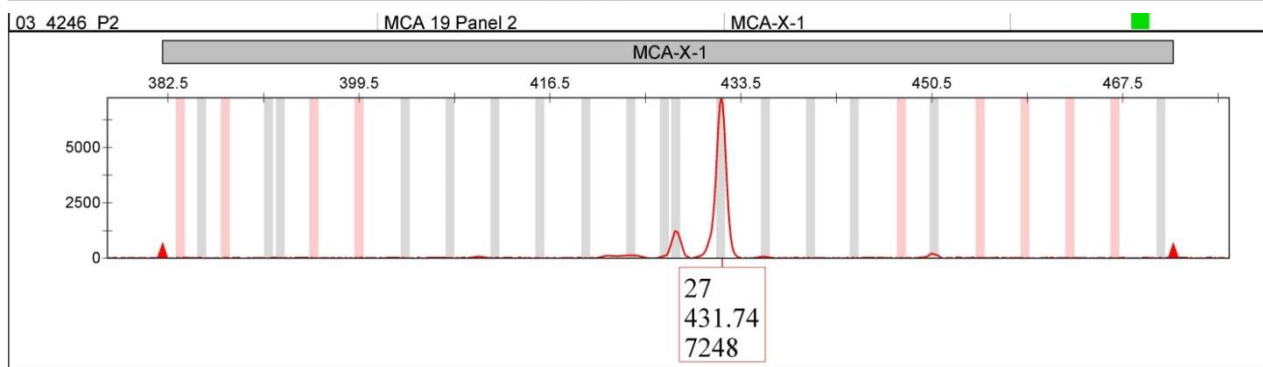

Supplement: s1 [file s1]
