# Supplementary material for: Genetic Characterization of Rat Hepatic Stellate Cell Line PAV-1
Source: MDPI journal article supplement (doi:10.3390/cells12121603), 2023-06-11
Supplement: s1 [file s1]

**Table S1: Short tandem repeat (STR) marker analysis for AML12 cells**

| STR Marker                   | Sample Results (AML12) | CVCL_0120 (3T3-Swiss albino) | CVCL_B6Z5 (MFC/HL-041) | CVCL_0321 (HT22) | CVCL_3420 (STO) | CVCL_VR92 (MEC1) | CVCL_ZL25 (GN11) |
|------------------------------|------------------------|------------------------------|------------------------|------------------|-----------------|------------------|------------------|
| Mouse STR 1-1 (MCA-1-1)      | 11                     | 10,15                        | NN                     | 10,11            | 12              | <b>11</b>        | <b>10</b>        |
| Mouse STR 1-2 (MCA-1-2)      | 13                     | 13                           | NN                     | 13,17            | 16              | 13               | 13               |
| Mouse STR 2-1 (MCA-2-1)      | 9                      | 9                            | NN                     | 9                | 9               | 9                | 9                |
| Mouse STR 3-2 (MCA-3-2)      | 12                     | 14                           | NN                     | 14,15            | 14              | 12,13,15         | 14               |
| Mouse STR 4-2 (MCA-4-2)      | 20.3                   | 19.3                         | 19.3                   | 18.3,19.3,20.3   | 20.3            | 19.3             | 19.3             |
| Mouse STR 5-5 (MCA-5-5)      | 14,15                  | 13,15                        | 13                     | 13,14,15         | 14              | 13,14            | 14               |
| Mouse STR 6-4 (MCA-6-4)      | 15.3                   | 15.3                         | 14.3                   | 15.3             | 15.3            | 18.3             | 15.3             |
| Mouse STR 6-7 (MCA-6-7)      | 12                     | 12,15                        | 12                     | 12               | 12              | 12,15            | 12               |
| Mouse STR 7-1 (MCA-7-1)      | 29                     | 25.2, 29                     | NN                     | 29               | 25.2            | 29               | 28               |
| Mouse STR 8-1 (MCA-8-1)      | 14,15                  | 15,16                        | NN                     | 15               | 16              | 16,17            | 15               |
| Mouse STR 9-2 (MCA-9-2)*     | 15                     | NN                           | NN                     | NN               |                 |                  |                  |
| Mouse STR 11-2 (MCA-11-2)    | 18                     | 15                           | NN                     | 15,17,18         | 15              | 15,18            | 15,16            |
| Mouse STR 12-1 (MCA-12-1)    | 19                     | 19                           | 19                     | 20               | 19              | 17,18            | 20               |
| Mouse STR 13-1 (MCA-13-1)    | 15                     | 15                           | NN                     | 16.2             | 16.2            | 15               | 15.2             |
| Mouse STR 15-3 (MCA-15-3)    | 21.3                   | 20.3                         | 20.3                   | 20.3             | 20.3            | 20.3,21.3        | 20.3             |
| Mouse STR 17-2 (MCA-17-2)    | 13,15                  | 12,15                        | NN                     | 12,13,14         | 13              | 13               | 15               |
| Mouse STR 18-3 (MCA-18-3)    | 21                     | 17,21                        | 17,21                  | 17,19            | 19              | 17,20            | 17               |
| Mouse STR 19-2 (MCA-19-2)    | 13                     | 12                           | NN                     | 11,12            | 12              | 12,14            | 12               |
| Mouse STR X-1 (MCA-X-1)      | 26                     | 26,27                        | 26                     | 25               | 26              | 25               | 26               |
| <b>Identity to AML12 (%)</b> | <b>NA</b>              | <b>46.81</b>                 | <b>44.44</b>           | <b>42.31</b>     | <b>41.03</b>    | <b>40.82</b>     | 40.00            |

The search was conducted with the Cellosaurus STR Similarity Search Tool CLASTR 1.4.4 (<https://web.expasy.org/cellosaurus-str-search/>) containing 83 mouse cell lines with STR profile (16.11.2022). The five highest homologies found were CVCL\_0120 (3T-Swiss albino, 46.81%), CVCL\_B6Z5 (MFC/HL-041, 44.44%), CVCL\_0321 (HT22, 42.31%), CVCL\_3420 (STO, 41.03%), CVCL\_VR92 (MEC1, 40.82%), and CVCL\_ZL25 (GN11, 40.00%) when using the following settings: Algorithm: Tanabe, Mode: Non-empty markers, Score filter: 40%, and Min. Markers: 8. \* this marker is not included in the Cellosaurus STR Similarity Search Tool routine.
