# Supplementary material for: Genetic Characterization of Rat Hepatic Stellate Cell Line PAV-1
Source: Cells. 2023 Jun 11;12(12):1603. doi: 10.3390/cells12121603 (PMC10297474; doi:10.3390/cells12121603)
Supplement: Supplementary file 1 [file cells-12-01603-s001.zip]

Archive with 5 entries (5 files):
- Figure S1,S3, and S4.pdf
- Figure S2.pdf
- Figure S5.pdf
- Table S1.pdf
- Table S2.xlsx
