# Supplementary material for: Genetic Characterization of Rat Hepatic Stellate Cell Line PAV-1
Source: Cells. 2023 Jun 11;12(12):1603. doi: 10.3390/cells12121603 (PMC10297474; doi:10.3390/cells12121603)
Supplement: Supplementary file 1 [file cells-12-01603-s001.zip › Table S2.xlsx]

## Sheet: merged_abundances
Gene expression in PAV-1 cells under basal culture conditions as determined by next generation sequencing
transcript_id	transcript_length	effective_length	estimated_counts	TPM	gene_id	gene_name	gene_description
ENSRNOT00000086427.1	459	265.779	474191	17612.5	ENSRNOG00000053633.1	LOC103690354	ribonuclease pancreatic beta-type [Source:RGD Symbol;Acc:9117758]
ENSRNOT00000030919.5	830	632.422	1120320	17487.4	ENSRNOG00000022619.6	Fth1	ferritin heavy chain 1 [Source:RGD Symbol;Acc:2635]
ENSRNOT00000013608.6	1389	1191.42	1071210	8875.58	ENSRNOG00000009439.6	Eef1a1	eukaryotic translation elongation factor 1 alpha 1 [Source:RGD Symbol;Acc:67387]
ENSRNOT00000028315.6	552	355.628	257172	7138.67	ENSRNOG00000020843.6	LOC100360087	ferritin light chain 1-like [Source:RGD Symbol;Acc:2322860]
ENSRNOT00000024430.5	1857	1659.42	1183200	7038.71	ENSRNOG00000018087.5	Vim	vimentin [Source:RGD Symbol;Acc:621646]
ENSRNOT00000044711.4	908	710.422	414470	5759.26	ENSRNOG00000031506.4	Ftl1	ferritin light chain 1 [Source:RGD Symbol;Acc:61813]
ENSRNOT00000065460.3	234	77.7862	41149	5222.12	ENSRNOG00000043342.3	LOC290595	hypothetical gene supported by AF152002 [Source:RGD Symbol;Acc:1566160]
ENSRNOT00000013393.6	297	123.853	65197.2	5196.51	ENSRNOG00000010105.6	S100a11	S100 calcium binding protein A11 [Source:RGD Symbol;Acc:1303295]
ENSRNOT00000005577.7	305	130.181	62791.4	4761.47	ENSRNOG00000004196.7	LOC108352650	40S ribosomal protein S29 [Source:RGD Symbol;Acc:11376557]
ENSRNOT00000018820.5	496	301.162	142491	4670.65	ENSRNOG00000013874.5	Rplp1	ribosomal protein lateral stalk subunit P1 [Source:RGD Symbol;Acc:621774]
ENSRNOT00000067391.1	382	195.001	89328.9	4522.14	ENSRNOG00000043098.1	Mt2A	metallothionein 2A [Source:RGD Symbol;Acc:1592345]
ENSRNOT00000022095.7	1644	1446.42	627557	4283	ENSRNOG00000016460.7	Clu	clusterin [Source:RGD Symbol;Acc:3907]
ENSRNOT00000033809.3	453	260.093	110253	4184.59	ENSRNOG00000025615.3	Rnase1l1	ribonuclease, RNase A family, 1-like 1 (pancreatic) [Source:RGD Symbol;Acc:1310106]
ENSRNOT00000089027.1	1656	1458.42	569833	3857.04	ENSRNOG00000051885.1	LOC100360413	eukaryotic translation elongation factor 1 alpha 1-like [Source:RGD Symbol;Acc:2322143]
ENSRNOT00000006359.5	703	505.524	195303	3813.79	ENSRNOG00000004741.5	Rpl19	ribosomal protein L19 [Source:RGD Symbol;Acc:621183]
ENSRNOT00000022846.5	472	278.054	106535	3782.29	ENSRNOG00000042499.1	LOC100364435	thymosin, beta 10-like [Source:RGD Symbol;Acc:2321025]
ENSRNOT00000042459.4	1263	1065.42	406622	3767.55	ENSRNOG00000034254.4	Actb	actin, beta [Source:RGD Symbol;Acc:628837]
ENSRNOT00000085201.1	2426	2228.42	792122	3509.01	ENSRNOG00000055962.1	Bgn	biglycan [Source:RGD Symbol;Acc:2207]
ENSRNOT00000055923.3	440	247.957	86605.3	3447.92	ENSRNOG00000037097.3	Wfdc18	WAP four-disulfide core domain 18 [Source:RGD Symbol;Acc:619957]
ENSRNOT00000001265.5	483	288.631	100648	3442.32	ENSRNOG00000000957.5	Rpl21	ribosomal protein L21 [Source:RGD Symbol;Acc:68390]
ENSRNOT00000035657.3	564	367.368	114341	3072.49	ENSRNOG00000023344.3	Rpl23a	ribosomal protein L23a [Source:RGD Symbol;Acc:1304897]
ENSRNOT00000066885.3	824	626.422	191326	3015.06	ENSRNOG00000042271.3	Ubb	ubiquitin B [Source:RGD Symbol;Acc:621562]
ENSRNOT00000016447.6	315	138.365	42175	3008.97	ENSRNOG00000012081.6	Txn1	thioredoxin 1 [Source:RGD Symbol;Acc:621157]
ENSRNOT00000038677.5	1376	1178.42	358236	3000.95	ENSRNOG00000010362.7	Anxa2	annexin A2 [Source:RGD Symbol;Acc:621170]
ENSRNOT00000079310.1	1901	1703.42	510476	2958.3	ENSRNOG00000053452.1	LOC100361457	actin, gamma 1 propeptide-like [Source:RGD Symbol;Acc:2320108]
ENSRNOT00000025421.6	662	464.64	136313	2896.08	ENSRNOG00000018795.6	Rpl18a	ribosomal protein L18A [Source:RGD Symbol;Acc:1302976]
ENSRNOT00000001518.6	1093	895.422	253816	2798.21	ENSRNOG00000001148.6	Rplp0	ribosomal protein lateral stalk subunit P0 [Source:RGD Symbol;Acc:621247]
ENSRNOT00000047450.3	2917	2719.42	756476	2746.05	ENSRNOG00000020266.5	Eef2	eukaryotic translation elongation factor 2 [Source:RGD Symbol;Acc:61979]
ENSRNOT00000083951.1	765	567.47	157033	2731.73	ENSRNOG00000056765.1	Rpl10	ribosomal protein L10 [Source:RGD Symbol;Acc:621178]
ENSRNOT00000001383.7	793	595.458	164655	2729.68	ENSRNOG00000001049.7	Tpt1	tumor protein, translationally-controlled 1 [Source:RGD Symbol;Acc:621623]
ENSRNOT00000042688.2	461	267.666	73122.3	2696.79	ENSRNOG00000032825.2	LOC100362027	ribosomal protein L30-like [Source:RGD Symbol;Acc:2318953]
ENSRNOT00000080988.1	1442	1244.42	326869	2592.96	ENSRNOG00000052802.1	Aldoa	aldolase, fructose-bisphosphate A [Source:RGD Symbol;Acc:2089]
ENSRNOT00000024106.7	1730	1532.42	402109	2590.33	ENSRNOG00000017895.7	Eno1	enolase 1 [Source:RGD Symbol;Acc:2553]
ENSRNOT00000019162.6	446	253.525	65013.9	2531.48	ENSRNOG00000014272.6	Rpl35	ribosomal protein L35 [Source:RGD Symbol;Acc:1303007]
ENSRNOT00000010180.5	860	662.422	169436	2524.99	ENSRNOG00000007650.5	Cd63	Cd63 molecule [Source:RGD Symbol;Acc:62080]
ENSRNOT00000091873.1	743	545.503	138955	2514.59	ENSRNOG00000027864.5	Ppia	peptidylprolyl isomerase A [Source:RGD Symbol;Acc:3372]
ENSRNOT00000025093.6	1164	966.422	245995	2512.75	ENSRNOG00000018584.6	LOC100359583	hypothetical protein LOC100359583 [Source:RGD Symbol;Acc:2323611]
ENSRNOT00000014849.4	630	432.685	108954	2485.78	ENSRNOG00000011138.4	Rpl29	ribosomal protein L29 [Source:RGD Symbol;Acc:62069]
ENSRNOT00000050156.3	1545	1347.42	337193	2470.38	ENSRNOG00000034234.3	Mt-co1	mitochondrially encoded cytochrome c oxidase I [Source:RGD Symbol;Acc:621871]
ENSRNOT00000005311.6	5825	5627.42	1408220	2470.3	ENSRNOG00000003897.6	Col1a1	collagen type I alpha 1 chain [Source:RGD Symbol;Acc:61817]
ENSRNOT00000051134.1	348	165.488	41261.2	2461.31	ENSRNOG00000029512.1	LOC100361854	ribosomal protein S26-like [Source:RGD Symbol;Acc:2319323]
ENSRNOT00000067875.4	1467	1269.42	316055	2457.8	ENSRNOG00000043451.4	Spp1	secreted phosphoprotein 1 [Source:RGD Symbol;Acc:3752]
ENSRNOT00000017486.7	2063	1865.42	456185	2414.09	ENSRNOG00000012840.7	Sparc	secreted protein acidic and cysteine rich [Source:RGD Symbol;Acc:3742]
ENSRNOT00000029791.4	552	355.628	85666.8	2377.97	ENSRNOG00000024603.4	Rps15	ribosomal protein S15 [Source:RGD Symbol;Acc:62026]
ENSRNOT00000077604.1	1693	1495.42	351634	2321.22	ENSRNOG00000058249.1	Pgk1	phosphoglycerate kinase 1 [Source:RGD Symbol;Acc:619878]
ENSRNOT00000046519.4	347	164.706	38050.4	2280.55	ENSRNOG00000034180.4	Rpl37	ribosomal protein L37 [Source:RGD Symbol;Acc:621204]
ENSRNOT00000013538.6	505	309.811	70556	2248.16	ENSRNOG00000009884.6	Lgals1	galectin 1 [Source:RGD Symbol;Acc:69355]
ENSRNOT00000041241.3	348	165.488	37458	2234.44	ENSRNOG00000033615.3	Mt-nd3	mitochondrially encoded NADH dehydrogenase 3 [Source:RGD Symbol;Acc:620557]
ENSRNOT00000068323.1	339	158.015	35070.6	2190.96	ENSRNOG00000042886.1	Rps28	ribosomal protein S28 [Source:RGD Symbol;Acc:621046]
ENSRNOT00000076978.3	949	751.422	164705	2163.78	ENSRNOG00000003201.9	Rps4x	ribosomal protein S4, X-linked [Source:RGD Symbol;Acc:2324318]
ENSRNOT00000017468.2	1600	1402.42	302890	2132.04	ENSRNOG00000013009.2	Ldha	lactate dehydrogenase A [Source:RGD Symbol;Acc:2996]
ENSRNOT00000025217.6	567	370.361	79612.4	2122	ENSRNOG00000018680.6	Rpl17	ribosomal protein L17 [Source:RGD Symbol;Acc:1303019]
ENSRNOT00000050443.4	1002	804.422	171195	2100.85	ENSRNOG00000018630.7	LOC108351137	glyceraldehyde-3-phosphate dehydrogenase [Source:RGD Symbol;Acc:11369796]
ENSRNOT00000057931.4	427	235.81	49334.8	2065.29	ENSRNOG00000038074.4	LOC498555	similar to 60S acidic ribosomal protein P2 [Source:RGD Symbol;Acc:1590791]
ENSRNOT00000066159.3	443	250.709	51937	2045.01	ENSRNOG00000042233.3	Rpl41	ribosomal protein L41 [Source:RGD Symbol;Acc:621210]
ENSRNOT00000066328.3	616	418.779	86499.6	2039.01	ENSRNOG00000020595.8	Rps11	ribosomal protein S11 [Source:RGD Symbol;Acc:621026]
ENSRNOT00000022897.4	342	160.485	32844	2020.28	ENSRNOG00000016961.4	Rps27	ribosomal protein S27 [Source:RGD Symbol;Acc:621045]
ENSRNOT00000011208.7	1297	1099.42	222640	1999.07	ENSRNOG00000008301.7	Tagln2	transgelin 2 [Source:RGD Symbol;Acc:1310840]
ENSRNOT00000057898.3	389	201.201	40329.2	1978.7	ENSRNOG00000038047.3	Mt1	metallothionein 1 [Source:RGD Symbol;Acc:3117]
ENSRNOT00000073160.2	474	279.975	56030.3	1975.57	ENSRNOG00000048199.2	Rps19l2	ribosomal protein S19-like2 [Source:RGD Symbol;Acc:68440]
ENSRNOT00000016329.6	1100	902.422	176392	1929.56	ENSRNOG00000011893.6	Rps3a	ribosomal protein S3a [Source:RGD Symbol;Acc:62078]
ENSRNOT00000081747.1	696	498.535	96480.6	1910.44	ENSRNOG00000054626.1	Rps8	ribosomal protein S8 [Source:RGD Symbol;Acc:61910]
ENSRNOT00000049683.3	784	586.458	113228	1905.93	ENSRNOG00000030700.3	Mt-co3	mitochondrially encoded cytochrome c oxidase III [Source:RGD Symbol;Acc:621873]
ENSRNOT00000022348.6	510	314.673	60463.1	1896.8	ENSRNOG00000016580.6	Rps23	ribosomal protein S23 [Source:RGD Symbol;Acc:621039]
ENSRNOT00000041328.3	1295	1097.42	210480	1893.33	ENSRNOG00000030963.3	LOC108351137	glyceraldehyde-3-phosphate dehydrogenase [Source:RGD Symbol;Acc:11369796]
ENSRNOT00000015332.7	1973	1775.42	337206	1874.92	ENSRNOG00000011329.7	Pkm	pyruvate kinase M1/2 [Source:RGD Symbol;Acc:3337]
ENSRNOT00000015612.5	472	278.054	52579	1866.69	ENSRNOG00000011647.5	S100a6	S100 calcium binding protein A6 [Source:RGD Symbol;Acc:620264]
ENSRNOT00000092456.1	357	173.187	32327.8	1842.68	ENSRNOG00000043348.3	LOC103693375	60S ribosomal protein L39 [Source:RGD Symbol;Acc:9312086]
ENSRNOT00000028060.6	476	281.901	52106.5	1824.67	ENSRNOG00000020674.6	Rpl27	ribosomal protein L27 [Source:RGD Symbol;Acc:621192]
ENSRNOT00000020265.7	700	502.535	91385.3	1795.15	ENSRNOG00000015078.7	Ifitm3	interferon induced transmembrane protein 3 [Source:RGD Symbol;Acc:1595844]
ENSRNOT00000059735.3	4977	4779.42	868387	1793.61	ENSRNOG00000002052.6	Ccdc80	coiled-coil domain containing 80 [Source:RGD Symbol;Acc:69421]
ENSRNOT00000014177.5	1942	1744.42	315880	1787.56	ENSRNOG00000010331.5	Ctsb	cathepsin B [Source:RGD Symbol;Acc:621509]
ENSRNOT00000049535.2	545	348.784	62296.2	1763.17	ENSRNOG00000034246.2	Rps27a	ribosomal protein S27a [Source:RGD Symbol;Acc:6489478]
ENSRNOT00000034951.5	897	699.422	124912	1763.01	ENSRNOG00000025936.5	Rpl6	ribosomal protein L6 [Source:RGD Symbol;Acc:619826]
ENSRNOT00000027073.6	504	308.873	54359	1737.32	ENSRNOG00000019974.6	Uba52	ubiquitin A-52 residue ribosomal protein fusion product 1 [Source:RGD Symbol;Acc:68344]
ENSRNOT00000034694.2	523	327.21	56688.8	1710.25	ENSRNOG00000028021.2	Rps13	ribosomal protein S13 [Source:RGD Symbol;Acc:621027]
ENSRNOT00000054958.2	2489	2291.42	396861	1709.71	ENSRNOG00000036689.2	P4hb	prolyl 4-hydroxylase subunit beta [Source:RGD Symbol;Acc:3244]
ENSRNOT00000025225.5	1017	819.422	141910	1709.6	ENSRNOG00000018645.5	Rpsa	ribosomal protein SA [Source:RGD Symbol;Acc:71026]
ENSRNOT00000081355.1	1608	1410.42	243742	1705.97	ENSRNOG00000053468.1	Tuba1b	tubulin, alpha 1B [Source:RGD Symbol;Acc:1565476]
ENSRNOT00000014493.5	541	344.874	59511.9	1703.46	ENSRNOG00000010746.5	Rpl32	ribosomal protein L32 [Source:RGD Symbol;Acc:621203]
ENSRNOT00000057585.4	8136	7938.42	1362120	1693.83	ENSRNOG00000014288.8	Fn1	fibronectin 1 [Source:RGD Symbol;Acc:2624]
ENSRNOT00000041984.3	832	634.422	107917	1679.19	ENSRNOG00000032635.3	LOC100360117	ribosomal protein L8-like [Source:RGD Symbol;Acc:2322732]
ENSRNOT00000005471.7	562	365.397	61439	1659.85	ENSRNOG00000004107.7	Rpl23	ribosomal protein L23 [Source:RGD Symbol;Acc:62067]
ENSRNOT00000077564.1	348	165.488	27592.4	1645.93	ENSRNOG00000056076.1	LOC103694877	macrophage migration inhibitory factor [Source:RGD Symbol;Acc:9444736]
ENSRNOT00000008608.4	348	165.488	27592.4	1645.93	ENSRNOG00000006589.4	Mif	macrophage migration inhibitory factor [Source:RGD Symbol;Acc:621163]
ENSRNOT00000021725.7	586	389.118	64759.7	1642.91	ENSRNOG00000016220.7	Rpl12	ribosomal protein L12 [Source:RGD Symbol;Acc:1565106]
ENSRNOT00000042661.2	303	128.583	21396.9	1642.7	ENSRNOG00000030747.2	LOC685963	similar to 60S ribosomal protein L38 [Source:RGD Symbol;Acc:1587812]
ENSRNOT00000051411.4	183	45.9852	7516.63	1613.6	ENSRNOG00000031802.4	LOC691427	similar to 6.8 kDa mitochondrial proteolipid [Source:RGD Symbol;Acc:1583946]
ENSRNOT00000067032.3	1298	1100.42	179030	1606.04	ENSRNOG00000016896.8	Rpl3	ribosomal protein L3 [Source:RGD Symbol;Acc:735105]
ENSRNOT00000044275.3	1315	1117.42	180458	1594.22	ENSRNOG00000008414.8	Bsg	basigin (Ok blood group) [Source:RGD Symbol;Acc:2220]
ENSRNOT00000030428.3	1069	871.422	139912	1584.96	ENSRNOG00000023529.3	Rpl5	ribosomal protein L5 [Source:RGD Symbol;Acc:619825]
ENSRNOT00000019508.6	882	684.422	109275	1576.11	ENSRNOG00000014179.7	Rps2	ribosomal protein S2 [Source:RGD Symbol;Acc:619887]
ENSRNOT00000046201.3	204	58.2734	9026.11	1529.04	ENSRNOG00000033299.3	Mt-atp8	mitochondrially encoded ATP synthase 8 [Source:RGD Symbol;Acc:621240]
ENSRNOT00000080216.1	1323	1125.42	173812	1524.6	ENSRNOG00000034254.4	Actb	actin, beta [Source:RGD Symbol;Acc:628837]
ENSRNOT00000011945.4	2306	2108.42	321350	1504.56	ENSRNOG00000008816.4	Gpnmb	glycoprotein nmb [Source:RGD Symbol;Acc:71008]
ENSRNOT00000009046.8	354	170.613	25784.2	1491.87	ENSRNOG00000016387.8	Rpl34	ribosomal protein L34 [Source:RGD Symbol;Acc:1309402]
ENSRNOT00000026528.7	765	567.47	85330.2	1484.4	ENSRNOG00000019453.7	Rps5	ribosomal protein S5 [Source:RGD Symbol;Acc:3601]
ENSRNOT00000071965.2	1742	1544.42	225903	1443.93	ENSRNOG00000050585.2	Pgam1	phosphoglycerate mutase 1 [Source:RGD Symbol;Acc:3312]
ENSRNOT00000001894.5	1526	1328.42	193587	1438.56	ENSRNOG00000025001.6	Pcolce	procollagen C-endopeptidase enhancer [Source:RGD Symbol;Acc:3270]
ENSRNOT00000008276.3	712	514.524	73651.9	1413.08	ENSRNOG00000006283.3	LOC100359922	60S ribosomal protein L13-like [Source:RGD Symbol;Acc:2323122]
ENSRNOT00000084232.1	1209	1011.42	143279	1398.42	ENSRNOG00000052620.1	Rack1	receptor for activated C kinase 1 [Source:RGD Symbol;Acc:69229]
ENSRNOT00000012775.7	2190	1992.42	279633	1385.47	ENSRNOG00000008639.7	Pabpc1	poly(A) binding protein, cytoplasmic 1 [Source:RGD Symbol;Acc:619838]
ENSRNOT00000043693.3	684	486.554	67996	1379.56	ENSRNOG00000030371.3	Mt-co2	mitochondrially encoded cytochrome c oxidase II [Source:RGD Symbol;Acc:621872]
ENSRNOT00000004290.4	1661	1463.42	202752	1367.68	ENSRNOG00000003148.5	Timp2	TIMP metallopeptidase inhibitor 2 [Source:RGD Symbol;Acc:61312]
ENSRNOT00000020528.5	2333	2135.42	293607	1357.29	ENSRNOG00000015036.6	Ccn2	cellular communication network factor 2 [Source:RGD Symbol;Acc:621392]
ENSRNOT00000028555.6	613	415.837	57025	1353.73	ENSRNOG00000021035.6	Rpl18	ribosomal protein L18 [Source:RGD Symbol;Acc:621182]
ENSRNOT00000026576.7	806	608.434	83377	1352.76	ENSRNOG00000019578.7	Rps16	ribosomal protein S16 [Source:RGD Symbol;Acc:621031]
ENSRNOT00000021073.5	1021	823.422	112620	1350.15	ENSRNOG00000015496.6	Tpm4	tropomyosin 4 [Source:RGD Symbol;Acc:3899]
ENSRNOT00000041813.5	503	307.898	41972.1	1345.69	ENSRNOG00000029627.5	LOC100359951	ribosomal protein S20-like [Source:RGD Symbol;Acc:2323094]
ENSRNOT00000010383.7	780	582.458	78746.5	1334.61	ENSRNOG00000007663.7	LOC100911372	40S ribosomal protein S6-like [Source:RGD Symbol;Acc:6493116]
ENSRNOT00000092867.1	701	503.524	67888.7	1330.97	ENSRNOG00000008551.7	Rps7	ribosomal protein S7 [Source:RGD Symbol;Acc:61907]
ENSRNOT00000027305.7	1395	1197.42	160960	1326.97	ENSRNOG00000020075.7	Eef1g	eukaryotic translation elongation factor 1 gamma [Source:RGD Symbol;Acc:1302939]
ENSRNOT00000013461.7	1387	1189.42	158068	1311.89	ENSRNOG00000009378.7	Rpl4	ribosomal protein L4 [Source:RGD Symbol;Acc:619824]
ENSRNOT00000022184.4	543	346.818	45543.7	1296.33	ENSRNOG00000016411.4	Rps12	ribosomal protein S12 [Source:RGD Symbol;Acc:62024]
ENSRNOT00000074325.1	1140	942.422	123292	1291.45	ENSRNOG00000047746.1	AABR07000398.1
ENSRNOT00000005588.7	574	377.263	49026.5	1282.85	ENSRNOG00000004214.7	Rpl26	ribosomal protein L26 [Source:RGD Symbol;Acc:1310607]
ENSRNOT00000028481.6	572	375.286	48241.1	1268.95	ENSRNOG00000020982.6	LOC687780	similar to Finkel-Biskis-Reilly murine sarcoma virusubiquitously expressed [Source:RGD Symbol;Acc:1597505]
ENSRNOT00000022983.6	2052	1854.42	237132	1262.32	ENSRNOG00000016831.6	Serpinh1	serpin family H member 1 [Source:RGD Symbol;Acc:69302]
ENSRNOT00000004091.6	1865	1667.42	207974	1231.27	ENSRNOG00000003029.6	Calr	calreticulin [Source:RGD Symbol;Acc:620288]
ENSRNOT00000078975.1	378	191.492	23872.6	1230.66	ENSRNOG00000054489.1	AABR07042821.1
ENSRNOT00000013159.5	2100	1902.42	236955	1229.56	ENSRNOG00000009920.5	LOC680121	similar to heat shock protein 8 [Source:RGD Symbol;Acc:1595502]
ENSRNOT00000046108.3	681	483.583	60030.9	1225.44	ENSRNOG00000031979.3	Mt-atp6	mitochondrially encoded ATP synthase 6 [Source:RGD Symbol;Acc:621239]
ENSRNOT00000047936.5	554	357.586	44172.4	1219.44	ENSRNOG00000032803.5	Rpl21	ribosomal protein L21 [Source:RGD Symbol;Acc:68390]
ENSRNOT00000071708.2	594	397.023	48893	1215.68	ENSRNOG00000047931.2	Tmsb4x	thymosin beta 4, X-linked [Source:RGD Symbol;Acc:621622]
ENSRNOT00000013588.7	525	329.157	40348.5	1210.08	ENSRNOG00000010189.8	Rps24	ribosomal protein S24 [Source:RGD Symbol;Acc:621040]
ENSRNOT00000015962.6	1105	907.422	109768	1194.14	ENSRNOG00000020660.7	Cfl1	cofilin 1 [Source:RGD Symbol;Acc:69285]
ENSRNOT00000025462.6	1643	1445.42	174315	1190.5	ENSRNOG00000018566.6	Ctsl	cathepsin L [Source:RGD Symbol;Acc:2448]
ENSRNOT00000089074.1	677	479.583	57610.8	1185.85	ENSRNOG00000054140.1	Myl6	myosin light chain 6 [Source:RGD Symbol;Acc:1589019]
ENSRNOT00000027246.5	527	331.098	39771.8	1185.79	ENSRNOG00000037897.3	Rps19l2	ribosomal protein S19-like2 [Source:RGD Symbol;Acc:68440]
ENSRNOT00000005370.6	816	618.422	73096	1166.81	ENSRNOG00000003975.6	Pfn1	profilin 1 [Source:RGD Symbol;Acc:621825]
ENSRNOT00000014216.5	948	750.422	88402.7	1162.92	ENSRNOG00000010645.5	Lgals3	galectin 3 [Source:RGD Symbol;Acc:69356]
ENSRNOT00000026341.5	681	483.583	56665	1156.73	ENSRNOG00000019459.5	Oaz1	ornithine decarboxylase antizyme 1 [Source:RGD Symbol;Acc:3219]
ENSRNOT00000023664.6	1415	1217.42	137609	1115.82	ENSRNOG00000017469.6	Anxa1	annexin A1 [Source:RGD Symbol;Acc:2118]
ENSRNOT00000019787.2	2428	2230.42	252064	1115.61	ENSRNOG00000014532.2	Lbp	lipopolysaccharide binding protein [Source:RGD Symbol;Acc:61865]
ENSRNOT00000000696.5	2568	2370.42	266980	1111.84	ENSRNOG00000000571.6	Psap	prosaposin [Source:RGD Symbol;Acc:3423]
ENSRNOT00000003965.4	1773	1575.42	177407	1111.64	ENSRNOG00000002840.4	Atp5f1b	ATP synthase F1 subunit beta [Source:RGD Symbol;Acc:621368]
ENSRNOT00000029546.5	375	188.817	21199.2	1108.33	ENSRNOG00000027503.5	Rps25	ribosomal protein s25 [Source:RGD Symbol;Acc:621043]
ENSRNOT00000091057.1	2302	2104.42	235265	1103.61	ENSRNOG00000002746.7	Fstl1	follistatin-like 1 [Source:RGD Symbol;Acc:68955]
ENSRNOT00000011904.5	2435	2237.42	245560	1083.43	ENSRNOG00000008697.5	Ccn3	cellular communication network factor 3 [Source:RGD Symbol;Acc:621553]
ENSRNOT00000035240.4	573	376.271	40960.9	1074.63	ENSRNOG00000023226.4	S100a10	S100 calcium binding protein A10 [Source:RGD Symbol;Acc:628655]
ENSRNOT00000032613.4	2014	1816.42	195286	1061.31	ENSRNOG00000023150.5	Gpi	glucose-6-phosphate isomerase [Source:RGD Symbol;Acc:2727]
ENSRNOT00000088846.1	384	196.737	21031	1055.27	ENSRNOG00000061857.1	Mgst2	microsomal glutathione S-transferase 2 [Source:RGD Symbol;Acc:1311218]
ENSRNOT00000084027.1	246	86.1001	9108.73	1044.35	ENSRNOG00000060449.1	Rps21	ribosomal protein S21 [Source:RGD Symbol;Acc:621038]
ENSRNOT00000024678.5	393	204.71	21505.9	1037.07	ENSRNOG00000018320.6	Rps15a	ribosomal protein S15a [Source:RGD Symbol;Acc:619939]
ENSRNOT00000004702.7	294	121.541	12588	1022.41	ENSRNOG00000003542.7	Hcfc1r1	host cell factor C1 regulator 1 [Source:RGD Symbol;Acc:727975]
ENSRNOT00000000603.7	715	517.514	53312.1	1016.93	ENSRNOG00000000505.7	Rpl10a	ribosomal protein L10A [Source:RGD Symbol;Acc:620497]
ENSRNOT00000023935.5	809	611.434	62536	1009.65	ENSRNOG00000017418.5	Rps3	ribosomal protein S3 [Source:RGD Symbol;Acc:619888]
ENSRNOT00000007794.6	1686	1488.42	152018	1008.23	ENSRNOG00000005924.6	Dstn	destrin, actin depolymerizing factor [Source:RGD Symbol;Acc:1588366]
ENSRNOT00000078946.1	415	224.731	22709.2	997.533	ENSRNOG00000057092.1	Slfn4	schlafen 4 [Source:RGD Symbol;Acc:620455]
ENSRNOT00000002194.7	509	313.698	31038.7	976.746	ENSRNOG00000001611.7	Rpl24	ribosomal protein L24 [Source:RGD Symbol;Acc:621191]
ENSRNOT00000085692.1	2545	2347.42	229697	965.948	ENSRNOG00000057823.1	Ubc	ubiquitin C [Source:RGD Symbol;Acc:621244]
ENSRNOT00000029435.5	2799	2601.42	253522	962.045	ENSRNOG00000026963.6	Hsp90b1	heat shock protein 90 beta family member 1 [Source:RGD Symbol;Acc:1310482]
ENSRNOT00000014904.7	464	270.497	26001.2	948.901	ENSRNOG00000011104.7	LOC100360057	ribosomal protein L22-like [Source:RGD Symbol;Acc:2322888]
ENSRNOT00000021048.7	974	776.422	74429.6	946.319	ENSRNOG00000015278.7	Myl12a	myosin light chain 12A [Source:RGD Symbol;Acc:1309537]
ENSRNOT00000046240.4	1095	897.422	85946	945.407	ENSRNOG00000030871.4	Calm2	calmodulin 2 [Source:RGD Symbol;Acc:2258]
ENSRNOT00000020676.6	617	419.779	40088.4	942.731	ENSRNOG00000015320.7	Atp5mc2	ATP synthase membrane subunit c locus 2 [Source:RGD Symbol;Acc:620051]
ENSRNOT00000030043.5	537	340.936	32290.9	934.969	ENSRNOG00000026260.6	Rpl11	ribosomal protein L11 [Source:RGD Symbol;Acc:1308681]
ENSRNOT00000023724.6	822	624.422	58721	928.335	ENSRNOG00000017417.6	Gabarap	GABA type A receptor-associated protein [Source:RGD Symbol;Acc:61911]
ENSRNOT00000023806.3	1068	870.422	80093	908.352	ENSRNOG00000017708.3	AABR07073038.1	poly(rC) binding protein 1 [Source:NCBI gene;Acc:500242]
ENSRNOT00000013073.4	993	795.422	72553.2	900.427	ENSRNOG00000009734.4	Akr1b8	aldo-keto reductase family 1, member B8 [Source:RGD Symbol;Acc:708475]
ENSRNOT00000015958.4	653	455.649	41452	898.058	ENSRNOG00000011821.4	S100a4	S100 calcium-binding protein A4 [Source:RGD Symbol;Acc:3245]
ENSRNOT00000023132.5	889	691.422	62828.9	897.027	ENSRNOG00000017194.5	Prdx1	peroxiredoxin 1 [Source:RGD Symbol;Acc:620039]
ENSRNOT00000020478.7	1881	1683.42	150675	883.564	ENSRNOG00000015018.7	Pdia3	protein disulfide isomerase family A, member 3 [Source:RGD Symbol;Acc:68430]
ENSRNOT00000028557.7	2335	2137.42	186969	863.511	ENSRNOG00000021031.7	Grn	granulin precursor [Source:RGD Symbol;Acc:61983]
ENSRNOT00000026920.6	2338	2140.42	186680	860.972	ENSRNOG00000019834.6	Hsp90ab1	heat shock protein 90 alpha family class B member 1 [Source:RGD Symbol;Acc:1303075]
ENSRNOT00000022864.5	489	294.426	25584.7	857.816	ENSRNOG00000016912.6	Btf3	basic transcription factor 3 [Source:RGD Symbol;Acc:1308095]
ENSRNOT00000022343.7	1197	999.422	86313	852.544	ENSRNOG00000016478.7	Eif5a	eukaryotic translation initiation factor 5A [Source:RGD Symbol;Acc:1308029]
ENSRNOT00000024601.4	769	571.47	49333	852.185	ENSRNOG00000018237.4	Gstp1	glutathione S-transferase pi 1 [Source:RGD Symbol;Acc:2758]
ENSRNOT00000092061.1	582	385.157	33019	846.284	ENSRNOG00000052025.1	Tle5	TLE family member 5, transcriptional modulator [Source:RGD Symbol;Acc:2731]
ENSRNOT00000050223.3	1655	1457.42	124321	842.071	ENSRNOG00000006532.5	H3f3a	H3 histone family member 3A [Source:RGD Symbol;Acc:2319910]
ENSRNOT00000071215.2	1116	918.422	78242.4	840.988	ENSRNOG00000047374.2	Gnas	GNAS complex locus [Source:RGD Symbol;Acc:2716]
ENSRNOT00000073429.2	2217	2019.42	171216	836.964	ENSRNOG00000046345.2	Rpn1	ribophorin I [Source:RGD Symbol;Acc:3594]
ENSRNOT00000009665.6	1282	1084.42	91782.4	835.508	ENSRNOG00000006865.6	Laptm4a	lysosomal protein transmembrane 4 alpha [Source:RGD Symbol;Acc:735179]
ENSRNOT00000027860.4	2056	1858.42	156746	832.61	ENSRNOG00000020533.4	Htra1	HtrA serine peptidase 1 [Source:RGD Symbol;Acc:69235]
ENSRNOT00000015152.6	1059	861.422	72326.3	828.839	ENSRNOG00000011175.8	Hnrnpa2b1	heterogeneous nuclear ribonucleoprotein A2/B1 [Source:RGD Symbol;Acc:1310403]
ENSRNOT00000079830.1	1468	1270.42	106239	825.516	ENSRNOG00000052564.1	Gpx3	glutathione peroxidase 3 [Source:RGD Symbol;Acc:69224]
ENSRNOT00000056151.4	541	344.874	28554	817.328	ENSRNOG00000015277.7	Serf2	small EDRK-rich factor 2 [Source:RGD Symbol;Acc:1588368]
ENSRNOT00000035788.5	1006	808.422	65953	805.353	ENSRNOG00000026124.5	Id3	inhibitor of DNA binding 3, HLH protein [Source:RGD Symbol;Acc:2860]
ENSRNOT00000083427.1	716	518.514	42089.3	801.311	ENSRNOG00000019007.7	Rpl14	ribosomal protein L14 [Source:RGD Symbol;Acc:621180]
ENSRNOT00000006591.7	1279	1081.42	87392.1	797.75	ENSRNOG00000004616.8	Npm1	nucleophosmin 1 [Source:RGD Symbol;Acc:3192]
ENSRNOT00000088391.1	5349	5151.42	414017	793.378	ENSRNOG00000058898.1	Nedd4	NEDD4 E3 ubiquitin protein ligase [Source:RGD Symbol;Acc:3157]
ENSRNOT00000070912.2	3617	3419.42	270022	779.535	ENSRNOG00000045829.2	Thbs1	thrombospondin 1 [Source:RGD Symbol;Acc:1588455]
ENSRNOT00000079907.1	1058	860.422	67914.3	779.183	ENSRNOG00000060329.1	Emb	embigin [Source:RGD Symbol;Acc:621067]
ENSRNOT00000071664.2	1584	1386.42	109358	778.654	ENSRNOG00000050519.2	Rhoa	ras homolog family member A [Source:RGD Symbol;Acc:619921]
ENSRNOT00000051895.2	474	279.975	21953	774.042	ENSRNOG00000030237.2	Cox7c	cytochrome c oxidase subunit 7C [Source:RGD Symbol;Acc:2300145]
ENSRNOT00000016390.7	2670	2472.42	192839	769.949	ENSRNOG00000012216.7	Tgfbi	transforming growth factor, beta induced [Source:RGD Symbol;Acc:620017]
ENSRNOT00000043704.5	318	140.754	10963.7	768.927	ENSRNOG00000033473.5	Rpl36	ribosomal protein L36 [Source:RGD Symbol;Acc:62085]
ENSRNOT00000028793.6	2757	2559.42	199156	768.141	ENSRNOG00000021201.7	Txnip	thioredoxin interacting protein [Source:RGD Symbol;Acc:620886]
ENSRNOT00000001315.6	1516	1318.42	102474	767.271	ENSRNOG00000000991.6	Arpc1b	actin related protein 2/3 complex, subunit 1B [Source:RGD Symbol;Acc:2155]
ENSRNOT00000023017.5	1827	1629.42	124814	756.17	ENSRNOG00000017123.5	B2m	beta-2 microglobulin [Source:RGD Symbol;Acc:2189]
ENSRNOT00000064180.3	543	346.818	26480	753.712	ENSRNOG00000014405.7	Aprt	adenine phosphoribosyl transferase [Source:RGD Symbol;Acc:1307758]
ENSRNOT00000020216.3	663	465.64	35476.7	752.112	ENSRNOG00000014936.3	Ifitm2	interferon induced transmembrane protein 2 [Source:RGD Symbol;Acc:69332]
ENSRNOT00000023072.5	1253	1055.42	79321	741.911	ENSRNOG00000016727.5	Akr1a1	aldo-keto reductase family 1 member A1 [Source:RGD Symbol;Acc:68346]
ENSRNOT00000059501.2	456	262.924	19581.9	735.217	ENSRNOG00000018774.5	LOC100911847	40S ribosomal protein S14-like [Source:RGD Symbol;Acc:6490698]
ENSRNOT00000014785.5	3658	3460.42	257403	734.301	ENSRNOG00000010966.6	Itgb1	integrin subunit beta 1 [Source:RGD Symbol;Acc:2927]
ENSRNOT00000043230.5	646	448.667	33209.1	730.671	ENSRNOG00000002255.8	Fam162a	family with sequence similarity 162, member A [Source:RGD Symbol;Acc:1590883]
ENSRNOT00000091207.1	174	41.0617	3022	726.52	ENSRNOG00000061425.1	Cox14	cytochrome c oxidase assembly factor COX14 [Source:RGD Symbol;Acc:1598052]
ENSRNOT00000093187.1	131	20.934	1514	713.944	ENSRNOG00000062276.1	AABR07044631.2
ENSRNOT00000044551.4	798	600.458	43338.2	712.488	ENSRNOG00000047737.1	Rpl7a	ribosomal protein L7a [Source:RGD Symbol;Acc:1307586]
ENSRNOT00000006754.6	798	600.458	43338.2	712.488	ENSRNOG00000049097.1	Rpl7a	ribosomal protein L7a [Source:RGD Symbol;Acc:1307586]
ENSRNOT00000084674.1	898	700.422	50072.3	705.713	ENSRNOG00000055579.1	Tmbim6	transmembrane BAX inhibitor motif containing 6 [Source:RGD Symbol;Acc:3842]
ENSRNOT00000070897.1	2121	1923.42	137376	705.06	ENSRNOG00000050655.1	P4ha1	prolyl 4-hydroxylase subunit alpha 1 [Source:RGD Symbol;Acc:621000]
ENSRNOT00000086622.1	747	549.492	39225.6	704.69	ENSRNOG00000058909.1	Rps9	ribosomal protein S9 [Source:RGD Symbol;Acc:619889]
ENSRNOT00000079854.1	2128	1930.42	137671	704.009	ENSRNOG00000061216.1	Tubb5	tubulin, beta 5 class I [Source:RGD Symbol;Acc:628596]
ENSRNOT00000004313.5	1548	1350.42	95834	700.551	ENSRNOG00000003172.6	Serpinf1	serpin family F member 1 [Source:RGD Symbol;Acc:631369]
ENSRNOT00000022377.5	216	65.9083	4663	698.417	ENSRNOG00000016686.6	Tmem167a	transmembrane protein 167A [Source:RGD Symbol;Acc:2323318]
ENSRNOT00000016423.6	4464	4266.42	301194	696.902	ENSRNOG00000011292.6	NEWGENE_621351	collagen, type I, alpha 2 [Source:RGD Symbol;Acc:9452897]
ENSRNOT00000003550.7	863	665.422	46906.5	695.866	ENSRNOG00000002632.8	Naca	nascent polypeptide associated complex subunit alpha [Source:RGD Symbol;Acc:1308642]
ENSRNOT00000075610.2	2437	2239.42	157457	694.09	ENSRNOG00000010947.8	Mmp14	matrix metallopeptidase 14 [Source:RGD Symbol;Acc:620198]
ENSRNOT00000035628.5	1794	1596.42	112057	692.916	ENSRNOG00000008195.6	Ywhaz	tyrosine 3-monooxygenase/tryptophan 5-monooxygenase activation protein, zeta [Source:RGD Symbol;Acc:3980]
ENSRNOT00000040261.2	348	165.488	11446.9	682.83	ENSRNOG00000032303.2	LOC108349682	60S ribosomal protein L35a [Source:RGD Symbol;Acc:11401413]
ENSRNOT00000054957.2	1880	1682.42	116352	682.698	ENSRNOG00000036688.2	Arhgdia	Rho GDP dissociation inhibitor alpha [Source:RGD Symbol;Acc:1359547]
ENSRNOT00000004867.6	285	114.496	7906.05	681.643	ENSRNOG00000003670.6	Sumo2	small ubiquitin-like modifier 2 [Source:RGD Symbol;Acc:621761]
ENSRNOT00000020919.7	2052	1854.42	127842	680.544	ENSRNOG00000015461.7	Serpine2	serpin family E member 2 [Source:RGD Symbol;Acc:3748]
ENSRNOT00000023037.5	1755	1557.42	107358	680.484	ENSRNOG00000016271.5	Itm2b	integral membrane protein 2B [Source:RGD Symbol;Acc:620727]
ENSRNOT00000075397.1	5046	4848.42	333803	679.641	ENSRNOG00000046005.1	Scd2	stearoyl-Coenzyme A desaturase 2 [Source:RGD Symbol;Acc:621177]
ENSRNOT00000014407.5	448	255.391	17395	672.37	ENSRNOG00000010807.5	Cox6c	cytochrome c oxidase subunit 6C [Source:RGD Symbol;Acc:620616]
ENSRNOT00000001545.4	549	352.692	23855	667.687	ENSRNOG00000001170.4	Cox6a1	cytochrome c oxidase subunit 6A1 [Source:RGD Symbol;Acc:2384]
ENSRNOT00000093233.1	741	543.503	36573.1	664.277	ENSRNOG00000002052.6	Ccdc80	coiled-coil domain containing 80 [Source:RGD Symbol;Acc:69421]
ENSRNOT00000051693.4	343	161.347	10850.1	663.837	ENSRNOG00000033916.4	AC141489.1
ENSRNOT00000083156.1	1617	1419.42	94483.8	657.106	ENSRNOG00000060728.1	Tuba1a	tubulin, alpha 1A [Source:RGD Symbol;Acc:619717]
ENSRNOT00000024033.5	731	533.514	35488	656.637	ENSRNOG00000017817.5	Cox4i1	cytochrome c oxidase subunit 4i1 [Source:RGD Symbol;Acc:68374]
ENSRNOT00000004329.7	411	221.06	14555.7	650	ENSRNOG00000003220.7	H3f3b	H3 histone family member 3B [Source:RGD Symbol;Acc:621095]
ENSRNOT00000027976.6	1039	841.422	55352.1	649.397	ENSRNOG00000062298.1	Rpl13a	ribosomal protein L13A [Source:RGD Symbol;Acc:628697]
ENSRNOT00000013884.6	1642	1444.42	94986	649.165	ENSRNOG00000010239.6	Cnbp	CCHC-type zinc finger, nucleic acid binding protein [Source:RGD Symbol;Acc:621807]
ENSRNOT00000028754.5	495	300.21	19699	647.752	ENSRNOG00000021177.5	Cox8a	cytochrome c oxidase subunit 8A [Source:RGD Symbol;Acc:620638]
ENSRNOT00000013745.7	740	542.503	35531	646.539	ENSRNOG00000010208.7	Timp1	TIMP metallopeptidase inhibitor 1 [Source:RGD Symbol;Acc:621675]
ENSRNOT00000049000.6	1098	900.422	58745.4	644.047	ENSRNOG00000016731.8	Tpm2	tropomyosin 2 [Source:RGD Symbol;Acc:1559479]
ENSRNOT00000014089.4	839	641.422	41697	641.727	ENSRNOG00000010549.4	Tspo	translocator protein [Source:RGD Symbol;Acc:2228]
ENSRNOT00000024436.7	1956	1758.42	113879	639.31	ENSRNOG00000018159.7	Anxa4	annexin A4 [Source:RGD Symbol;Acc:621171]
ENSRNOT00000046799.2	450	257.282	16643.9	638.61	ENSRNOG00000032605.2	Rpl32	ribosomal protein L32 [Source:RGD Symbol;Acc:621203]
ENSRNOT00000080028.1	897	699.422	45239	638.504	ENSRNOG00000060229.1	Arf1	ADP-ribosylation factor 1 [Source:RGD Symbol;Acc:621270]
ENSRNOT00000030221.6	339	158.015	10181	636.037	ENSRNOG00000023086.6	LOC100360828	cAMP-regulated phosphoprotein 19-like [Source:RGD Symbol;Acc:2321330]
ENSRNOT00000028687.3	816	618.422	39417	629.199	ENSRNOG00000021125.8	Prdx5	peroxiredoxin 5 [Source:RGD Symbol;Acc:71007]
ENSRNOT00000080421.1	972	774.422	49233.7	627.587	ENSRNOG00000058412.1	Morf4l1	mortality factor 4 like 1 [Source:RGD Symbol;Acc:1307938]
ENSRNOT00000091596.1	1711	1513.42	96026.5	626.355	ENSRNOG00000036839.4	Hnrnpa1	heterogeneous nuclear ribonucleoprotein A1 [Source:RGD Symbol;Acc:69234]
ENSRNOT00000082300.1	267	101.044	6334.49	618.86	ENSRNOG00000051624.1	Hspe1	heat shock protein family E (Hsp10) member 1 [Source:RGD Symbol;Acc:2844]
ENSRNOT00000019247.5	1057	859.422	53844.5	618.479	ENSRNOG00000014214.5	Rpl27a	ribosomal protein L27a [Source:RGD Symbol;Acc:1309771]
ENSRNOT00000018695.5	2770	2572.42	159212	610.975	ENSRNOG00000013791.5	Enpp3	ectonucleotide pyrophosphatase/phosphodiesterase 3 [Source:RGD Symbol;Acc:708511]
ENSRNOT00000029025.5	923	725.422	44831.7	610.077	ENSRNOG00000013536.7	Cdc42	cell division cycle 42 [Source:RGD Symbol;Acc:71043]
ENSRNOT00000005645.6	568	371.346	22833	606.98	ENSRNOG00000004273.6	Ifitm1	interferon induced transmembrane protein 1 [Source:RGD Symbol;Acc:1307601]
ENSRNOT00000022550.6	2203	2005.42	121478	597.974	ENSRNOG00000016592.6	Gnai2	G protein subunit alpha i2 [Source:RGD Symbol;Acc:620243]
ENSRNOT00000020647.6	1444	1246.42	75406.7	597.22	ENSRNOG00000015290.6	Tpi1	triosephosphate isomerase 1 [Source:RGD Symbol;Acc:3896]
ENSRNOT00000034583.6	1404	1206.42	72712	594.972	ENSRNOG00000002896.7	Prdx6	peroxiredoxin 6 [Source:RGD Symbol;Acc:71005]
ENSRNOT00000070925.2	2074	1876.42	112930	594.112	ENSRNOG00000047276.2	AABR07044711.1	M2 pyruvate kinase-like [Source:NCBI gene;Acc:100362738]
ENSRNOT00000009511.5	555	358.578	21557	593.463	ENSRNOG00000007048.5	Rap1b	RAP1B, member of RAS oncogene family [Source:RGD Symbol;Acc:620577]
ENSRNOT00000007100.5	1738	1540.42	92251	591.182	ENSRNOG00000005290.5	Ywhae	tyrosine 3-monooxygenase/tryptophan 5-monooxygenase activation protein, epsilon [Source:RGD Symbol;Acc:62000]
ENSRNOT00000040993.4	1039	841.422	50256	589.608	ENSRNOG00000031033.4	Mt-nd2	mitochondrially encoded NADH dehydrogenase 2 [Source:RGD Symbol;Acc:620556]
ENSRNOT00000027407.4	2022	1824.42	108589	587.557	ENSRNOG00000020206.7	Ctsd	cathepsin D [Source:RGD Symbol;Acc:621511]
ENSRNOT00000076052.2	976	778.422	46322.5	587.444	ENSRNOG00000016810.7	Stmn1	stathmin 1 [Source:RGD Symbol;Acc:2992]
ENSRNOT00000013582.6	1137	939.422	55798	586.337	ENSRNOG00000009982.6	Pnp	purine nucleoside phosphorylase [Source:RGD Symbol;Acc:1597189]
ENSRNOT00000006804.5	1154	956.422	56714	585.37	ENSRNOG00000005041.5	Crip2	cysteine-rich protein 2 [Source:RGD Symbol;Acc:1302959]
ENSRNOT00000026580.6	2349	2151.42	126705	581.376	ENSRNOG00000019629.7	Lamp1	lysosomal-associated membrane protein 1 [Source:RGD Symbol;Acc:2989]
ENSRNOT00000005786.6	1258	1060.42	62221	579.226	ENSRNOG00000004252.6	LOC108348062	eukaryotic translation initiation factor 3 subunit H [Source:RGD Symbol;Acc:11498408]
ENSRNOT00000022828.7	980	782.422	45445	573.37	ENSRNOG00000016781.7	Ppib	peptidylprolyl isomerase B [Source:RGD Symbol;Acc:620312]
ENSRNOT00000016330.5	2912	2714.42	156913	570.653	ENSRNOG00000011971.8	C1s	complement C1s [Source:RGD Symbol;Acc:619983]
ENSRNOT00000045401.4	434	242.362	13756.3	560.309	ENSRNOG00000039249.3	AABR07035539.1	ribosomal protein L31-like 4 [Source:NCBI gene;Acc:100361974]
ENSRNOT00000013563.7	2045	1847.42	104726	559.6	ENSRNOG00000009683.7	Sdcbp	syndecan binding protein [Source:RGD Symbol;Acc:621497]
ENSRNOT00000083666.1	1470	1272.42	72048.5	558.963	ENSRNOG00000011329.7	Pkm	pyruvate kinase M1/2 [Source:RGD Symbol;Acc:3337]
ENSRNOT00000012296.7	798	600.458	33954.9	558.225	ENSRNOG00000009263.8	Ifi27	interferon, alpha-inducible protein 27 [Source:RGD Symbol;Acc:69404]
ENSRNOT00000005286.7	2105	1907.42	107680	557.287	ENSRNOG00000003890.7	Nap1l1	nucleosome assembly protein 1-like 1 [Source:RGD Symbol;Acc:71094]
ENSRNOT00000086603.1	327	148.141	8314	554.02	ENSRNOG00000058914.1	Rbx1	ring-box 1 [Source:RGD Symbol;Acc:1308453]
ENSRNOT00000007175.6	785	587.458	32868	552.314	ENSRNOG00000005195.6	Cst3	cystatin C [Source:RGD Symbol;Acc:2432]
ENSRNOT00000030857.5	186	47.6521	2661.54	551.366	ENSRNOG00000047922.2	AABR07046628.1
ENSRNOT00000026075.4	1758	1560.42	86815	549.215	ENSRNOG00000019211.4	Olfml3	olfactomedin-like 3 [Source:RGD Symbol;Acc:1311106]
ENSRNOT00000043171.2	321	143.173	7950.12	548.152	ENSRNOG00000031315.2	Rpl36al	ribosomal protein L36a-like [Source:RGD Symbol;Acc:621156]
ENSRNOT00000073915.2	1021	823.422	45679	547.626	ENSRNOG00000046313.2	Basp1	brain abundant, membrane attached signal protein 1 [Source:RGD Symbol;Acc:621491]
ENSRNOT00000011494.4	1347	1149.42	62878.6	540.024	ENSRNOG00000008289.7	Slc25a3	solute carrier family 25 member 3 [Source:RGD Symbol;Acc:70986]
ENSRNOT00000074829.2	1768	1570.42	85689	538.64	ENSRNOG00000050197.2	Pdia6	protein disulfide isomerase family A, member 6 [Source:RGD Symbol;Acc:628688]
ENSRNOT00000049048.1	1770	1572.42	85403.5	536.162	ENSRNOG00000030628.2	Eif4a1	eukaryotic translation initiation factor 4A1 [Source:RGD Symbol;Acc:735141]
ENSRNOT00000022487.5	484	289.596	15642	533.199	ENSRNOG00000016660.5	Cox5b	cytochrome c oxidase subunit 5B [Source:RGD Symbol;Acc:620608]
ENSRNOT00000019487.5	3798	3600.42	194372	532.93	ENSRNOG00000014398.6	Scara5	scavenger receptor class A, member 5 [Source:RGD Symbol;Acc:1306539]
ENSRNOT00000008356.5	3210	3012.42	161173	528.162	ENSRNOG00000006197.7	Calu	calumenin [Source:RGD Symbol;Acc:620383]
ENSRNOT00000001816.6	1876	1678.42	88753	522.001	ENSRNOG00000001344.7	Aldh2	aldehyde dehydrogenase 2 family member [Source:RGD Symbol;Acc:69219]
ENSRNOT00000041033.4	1388	1190.42	62685.2	519.821	ENSRNOG00000033765.4	Eif1	eukaryotic translation initiation factor 1 [Source:RGD Symbol;Acc:1306308]
ENSRNOT00000042827.5	342	160.485	8385	515.773	ENSRNOG00000002280.6	Sh3bgrl	SH3 domain binding glutamate-rich protein like [Source:RGD Symbol;Acc:1560520]
ENSRNOT00000014910.5	652	454.658	23463	509.434	ENSRNOG00000011222.5	Dynll1	dynein light chain LC8-type 1 [Source:RGD Symbol;Acc:619866]
ENSRNOT00000070805.1	225	71.8083	3675	505.21	ENSRNOG00000046316.1	Tomm6	translocase of outer mitochondrial membrane 6 [Source:RGD Symbol;Acc:1583567]
ENSRNOT00000009503.7	1502	1304.42	66739	505.07	ENSRNOG00000005890.7	Serbp1	Serpine1 mRNA binding protein 1 [Source:RGD Symbol;Acc:619907]
ENSRNOT00000004836.6	794	596.458	30483.5	504.515	ENSRNOG00000003626.6	Atp5pd	ATP synthase peripheral stalk subunit d [Source:RGD Symbol;Acc:620083]
ENSRNOT00000074226.3	4520	4322.42	220021	502.488	ENSRNOG00000014426.7	Lox	lysyl oxidase [Source:RGD Symbol;Acc:3015]
ENSRNOT00000019554.6	1543	1345.42	68442	502.174	ENSRNOG00000014453.6	Anxa5	annexin A5 [Source:RGD Symbol;Acc:2120]
ENSRNOT00000010759.6	1865	1667.42	84770.9	501.87	ENSRNOG00000008140.6	Rpl15	ribosomal protein L15 [Source:RGD Symbol;Acc:621181]
ENSRNOT00000064679.2	1449	1251.42	63583	501.565	ENSRNOG00000004060.7	Calm1	calmodulin 1 [Source:RGD Symbol;Acc:2257]
ENSRNOT00000049001.3	995	797.422	40435.1	500.565	ENSRNOG00000032401.3	H3f3c	H3 histone family member 3C [Source:RGD Symbol;Acc:2321290]
ENSRNOT00000022892.5	1853	1655.42	83542	498.179	ENSRNOG00000017032.5	Atp5f1a	ATP synthase F1 subunit alpha [Source:RGD Symbol;Acc:619993]
ENSRNOT00000086310.1	2758	2560.42	128795	496.565	ENSRNOG00000059714.1	Hsp90aa1	heat shock protein 90 alpha family class A member 1 [Source:RGD Symbol;Acc:631409]
ENSRNOT00000024253.5	2002	1804.42	90470.6	494.947	ENSRNOG00000017510.8	Mfge8	milk fat globule-EGF factor 8 protein [Source:RGD Symbol;Acc:3083]
ENSRNOT00000026767.7	669	471.612	23636.7	494.758	ENSRNOG00000019773.7	Egln1	egl-9 family hypoxia-inducible factor 1 [Source:RGD Symbol;Acc:631375]
ENSRNOT00000025939.4	657	459.649	22980.3	493.536	ENSRNOG00000018937.4	Gstm7	glutathione S-transferase, mu 7 [Source:RGD Symbol;Acc:621287]
ENSRNOT00000041495.4	1335	1137.42	56789.8	492.877	ENSRNOG00000025625.5	Rnase4	ribonuclease A family member 4 [Source:RGD Symbol;Acc:61823]
ENSRNOT00000021091.6	390	202.063	10067	491.817	ENSRNOG00000015703.6	Hypk	Huntingtin interacting protein K [Source:RGD Symbol;Acc:1311457]
ENSRNOT00000016432.6	2075	1877.42	92680.4	487.322	ENSRNOG00000012247.6	Rab7a	RAB7A, member RAS oncogene family [Source:RGD Symbol;Acc:61908]
ENSRNOT00000034712.4	198	54.737	2696.7	486.342	ENSRNOG00000025388.5	Mrpl33	mitochondrial ribosomal protein L33 [Source:RGD Symbol;Acc:2322809]
ENSRNOT00000012478.5	1350	1152.42	56736	486.001	ENSRNOG00000009266.6	Anp32b	acidic nuclear phosphoprotein 32 family member B [Source:RGD Symbol;Acc:621285]
ENSRNOT00000080520.1	1573	1375.42	67275.9	482.851	ENSRNOG00000020587.6	Efemp2	EGF containing fibulin extracellular matrix protein 2 [Source:RGD Symbol;Acc:1359496]
ENSRNOT00000074617.2	862	664.422	32310.1	480.047	ENSRNOG00000048109.2	LOC100365839	40S ribosomal protein S3a-like [Source:RGD Symbol;Acc:2318248]
ENSRNOT00000066028.1	2266	2068.42	100267	478.528	ENSRNOG00000015857.6	Ctsa	cathepsin A [Source:RGD Symbol;Acc:1309070]
ENSRNOT00000087392.1	309	133.467	6433.13	475.815	ENSRNOG00000053623.1	LOC100360619	ribosomal protein L28-like [Source:RGD Symbol;Acc:2321738]
ENSRNOT00000021030.5	2486	2288.42	110145	475.138	ENSRNOG00000015630.5	Cct7	chaperonin containing TCP1 subunit 7 [Source:RGD Symbol;Acc:1306422]
ENSRNOT00000001911.4	1624	1426.42	68465	473.817	ENSRNOG00000001409.4	Gnb2	G protein subunit beta 2 [Source:RGD Symbol;Acc:69319]
ENSRNOT00000004799.5	876	678.422	32472	472.497	ENSRNOG00000003520.5	Prdx2	peroxiredoxin 2 [Source:RGD Symbol;Acc:3838]
ENSRNOT00000087768.1	454	261.04	12473.8	471.717	ENSRNOG00000004814.6	Elob	elongin B [Source:RGD Symbol;Acc:621200]
ENSRNOT00000092476.1	544	347.798	16557.9	469.967	ENSRNOG00000028505.6	Rps18	ribosomal protein S18 [Source:RGD Symbol;Acc:3595]
ENSRNOT00000058234.3	726	528.514	24946	465.944	ENSRNOG00000001596.7	Atp5mc3	ATP synthase membrane subunit c locus 3 [Source:RGD Symbol;Acc:620052]
ENSRNOT00000078349.1	2770	2572.42	120843	463.735	ENSRNOG00000011796.7	C1r	complement C1r [Source:RGD Symbol;Acc:1309091]
ENSRNOT00000028656.4	729	531.514	24841	461.364	ENSRNOG00000021104.4	Emp3	epithelial membrane protein 3 [Source:RGD Symbol;Acc:621094]
ENSRNOT00000022679.6	3071	2873.42	133844	459.821	ENSRNOG00000016695.6	Mmp2	matrix metallopeptidase 2 [Source:RGD Symbol;Acc:621316]
ENSRNOT00000003611.3	746	548.503	25485	458.664	ENSRNOG00000002671.3	Nme2	NME/NM23 nucleoside diphosphate kinase 2 [Source:RGD Symbol;Acc:619877]
ENSRNOT00000016076.5	1256	1058.42	49084	457.795	ENSRNOG00000012062.5	Npc2	NPC intracellular cholesterol transporter 2 [Source:RGD Symbol;Acc:628756]
ENSRNOT00000033733.5	1144	946.422	43613.7	454.912	ENSRNOG00000013508.7	Rpl31	ribosomal protein L31 [Source:RGD Symbol;Acc:621202]
ENSRNOT00000030761.4	1269	1071.42	49342.7	454.624	ENSRNOG00000023385.5	Rpl37a	ribosomal protein L37a [Source:RGD Symbol;Acc:2319947]
ENSRNOT00000087928.1	1340	1142.42	52509.1	453.73	ENSRNOG00000052802.1	Aldoa	aldolase, fructose-bisphosphate A [Source:RGD Symbol;Acc:2089]
ENSRNOT00000024947.4	1751	1553.42	71361.5	453.486	ENSRNOG00000018371.4	Tubb6	tubulin, beta 6 class V [Source:RGD Symbol;Acc:1305887]
ENSRNOT00000041789.2	1511	1313.42	60171	452.244	ENSRNOG00000016638.5	Gnb1	G protein subunit beta 1 [Source:RGD Symbol;Acc:2718]
ENSRNOT00000014033.5	3699	3501.42	160320	451.994	ENSRNOG00000010103.6	Eif4b	eukaryotic translation initiation factor 4B [Source:RGD Symbol;Acc:1306479]
ENSRNOT00000006835.5	463	269.546	12189	446.4	ENSRNOG00000027990.4	Crip1	cysteine rich protein 1 [Source:RGD Symbol;Acc:1597237]
ENSRNOT00000051368.4	766	568.47	25580.6	444.215	ENSRNOG00000025731.6	Ptma	prothymosin alpha [Source:RGD Symbol;Acc:61829]
ENSRNOT00000036040.3	1595	1397.42	62860	444.055	ENSRNOG00000003486.5	Mnda	myeloid cell nuclear differentiation antigen [Source:RGD Symbol;Acc:1306089]
ENSRNOT00000018074.6	1221	1023.42	45873	442.478	ENSRNOG00000013452.6	Rcn1	reticulocalbin 1 [Source:RGD Symbol;Acc:1311292]
ENSRNOT00000048490.2	2380	2182.42	97707	441.953	ENSRNOG00000030680.4	Ddx5	DEAD-box helicase 5 [Source:RGD Symbol;Acc:619906]
ENSRNOT00000055285.4	1234	1036.42	46393.1	441.883	ENSRNOG00000036839.4	Hnrnpa1	heterogeneous nuclear ribonucleoprotein A1 [Source:RGD Symbol;Acc:69234]
ENSRNOT00000010512.6	1286	1088.42	48311	438.166	ENSRNOG00000007901.6	Tmed10	transmembrane p24 trafficking protein 10 [Source:RGD Symbol;Acc:620970]
ENSRNOT00000043610.2	429	237.68	10491.9	435.763	ENSRNOG00000033024.2	AC099453.1
ENSRNOT00000031796.4	912	714.422	31535.9	435.753	ENSRNOG00000025602.4	Cdk4	cyclin-dependent kinase 4 [Source:RGD Symbol;Acc:621120]
ENSRNOT00000000177.4	1747	1549.42	67941	432.864	ENSRNOG00000000164.4	Lamp2	lysosomal-associated membrane protein 2 [Source:RGD Symbol;Acc:2990]
ENSRNOT00000000580.4	324	145.667	6371.82	431.809	ENSRNOG00000000488.4	Hmga1	high mobility group AT-hook 1 [Source:RGD Symbol;Acc:628699]
ENSRNOT00000089292.1	4119	3921.42	171227	431.042	ENSRNOG00000011292.6	NEWGENE_621351	collagen, type I, alpha 2 [Source:RGD Symbol;Acc:9452897]
ENSRNOT00000089564.1	4119	3921.42	171227	431.042	ENSRNOG00000052925.1	NEWGENE_621351	collagen, type I, alpha 2 [Source:RGD Symbol;Acc:9452897]
ENSRNOT00000059255.5	1989	1791.42	77933.3	429.452	ENSRNOG00000003147.8	Sqstm1	sequestosome 1 [Source:RGD Symbol;Acc:69287]
ENSRNOT00000033537.5	419	228.388	9911	428.384	ENSRNOG00000027049.6	Atp5mf	ATP synthase membrane subunit f [Source:RGD Symbol;Acc:1596067]
ENSRNOT00000042098.3	1143	945.422	40955	427.633	ENSRNOG00000031766.3	Mt-cyb	mitochondrially encoded cytochrome b [Source:RGD Symbol;Acc:620081]
ENSRNOT00000005073.7	4482	4284.42	185585	427.603	ENSRNOG00000003736.7	Col5a2	collagen type V alpha 2 chain [Source:RGD Symbol;Acc:70921]
ENSRNOT00000064535.2	4988	4790.42	206896	426.351	ENSRNOG00000017158.6	Eif4g2	eukaryotic translation initiation factor 4, gamma 2 [Source:RGD Symbol;Acc:1305294]
ENSRNOT00000048198.5	493	298.282	12871	425.965	ENSRNOG00000031022.5	LOC108348287	60S ribosomal protein L36a [Source:RGD Symbol;Acc:11421250]
ENSRNOT00000018038.5	517	321.398	13849	425.368	ENSRNOG00000013300.5	Atp5if1	ATP synthase inhibitory factor subunit 1 [Source:RGD Symbol;Acc:2181]
ENSRNOT00000025067.6	2562	2364.42	101707	424.635	ENSRNOG00000018294.6	Hspa5	heat shock protein family A (Hsp70) member 5 [Source:RGD Symbol;Acc:2843]
ENSRNOT00000024712.5	2582	2384.42	102398	423.933	ENSRNOG00000018273.7	Ncl	nucleolin [Source:RGD Symbol;Acc:3153]
ENSRNOT00000004956.4	4765	4567.42	195989	423.594	ENSRNOG00000003357.4	Col3a1	collagen type III alpha 1 chain [Source:RGD Symbol;Acc:71029]
ENSRNOT00000017635.6	1152	954.422	40851.5	422.53	ENSRNOG00000013167.6	Hmgb2	high mobility group box 2 [Source:RGD Symbol;Acc:69291]
ENSRNOT00000027260.4	1030	832.422	35560	421.704	ENSRNOG00000020060.4	Atf5	activating transcription factor 5 [Source:RGD Symbol;Acc:628902]
ENSRNOT00000037611.5	6306	6108.42	260890	421.616	ENSRNOG00000049236.2	Myh9l1	myosin heavy chain 9-like 1 [Source:RGD Symbol;Acc:6492022]
ENSRNOT00000000092.6	1467	1269.42	54170	421.252	ENSRNOG00000000081.6	Antxr2	ANTXR cell adhesion molecule 2 [Source:RGD Symbol;Acc:1561294]
ENSRNOT00000066084.1	478	283.827	12096.9	420.737	ENSRNOG00000042903.1	Cox7a2l2	cytochrome c oxidase subunit VIIa polypeptide 2-like 2 [Source:RGD Symbol;Acc:1589992]
ENSRNOT00000027980.7	472	278.054	11843.6	420.478	ENSRNOG00000020602.7	Ndufa13	NADH:ubiquinone oxidoreductase subunit A13 [Source:RGD Symbol;Acc:6492821]
ENSRNOT00000000072.2	289	117.612	4979	417.906	ENSRNOG00000000064.4	Atp5me	ATP synthase membrane subunit e [Source:RGD Symbol;Acc:621377]
ENSRNOT00000078872.1	1140	942.422	39586.4	414.658	ENSRNOG00000052968.1	Hnrnpa3	heterogeneous nuclear ribonucleoprotein A3 [Source:RGD Symbol;Acc:727807]
ENSRNOT00000028390.5	2435	2237.42	93899	414.288	ENSRNOG00000020889.7	Nucb1	nucleobindin 1 [Source:RGD Symbol;Acc:620030]
ENSRNOT00000075371.1	750	552.492	23137	413.4	ENSRNOG00000047598.1	Ctdsp2	CTD small phosphatase 2 [Source:RGD Symbol;Acc:2319209]
ENSRNOT00000024119.4	1282	1084.42	45133	410.852	ENSRNOG00000017914.4	Cavin3	caveolae associated protein 3 [Source:RGD Symbol;Acc:628755]
ENSRNOT00000065093.3	723	525.514	21754	408.643	ENSRNOG00000043044.3	Cnn2	calponin 2 [Source:RGD Symbol;Acc:1589807]
ENSRNOT00000090819.1	585	388.118	16018.2	407.419	ENSRNOG00000058909.1	Rps9	ribosomal protein S9 [Source:RGD Symbol;Acc:619889]
ENSRNOT00000021017.7	1327	1129.42	46491	406.352	ENSRNOG00000015221.7	Eif3f	eukaryotic translation initiation factor 3, subunit F [Source:RGD Symbol;Acc:1306112]
ENSRNOT00000014807.6	1069	871.422	35870	406.343	ENSRNOG00000010977.6	Igfbp6	insulin-like growth factor binding protein 6 [Source:RGD Symbol;Acc:2877]
ENSRNOT00000081802.1	1136	938.422	38625	406.312	ENSRNOG00000060098.1	Ptms	parathymosin [Source:RGD Symbol;Acc:621529]
ENSRNOT00000038927.5	693	495.535	20382.5	406.043	ENSRNOG00000026716.5	LOC100360449	ribosomal protein L9-like [Source:RGD Symbol;Acc:2322107]
ENSRNOT00000024775.5	1679	1481.42	60840	405.415	ENSRNOG00000018282.6	Gda	guanine deaminase [Source:RGD Symbol;Acc:621617]
ENSRNOT00000016152.6	3191	2993.42	122910	405.33	ENSRNOG00000012067.6	Fam111a	family with sequence similarity 111, member A [Source:RGD Symbol;Acc:1560913]
ENSRNOT00000013863.5	1647	1449.42	59509.4	405.303	ENSRNOG00000010170.5	Tubb4b	tubulin, beta 4B class IVb [Source:RGD Symbol;Acc:735101]
ENSRNOT00000042614.2	418	227.482	9291.56	403.211	ENSRNOG00000031127.2	Snrpe	small nuclear ribonucleoprotein polypeptide E [Source:RGD Symbol;Acc:2321675]
ENSRNOT00000072299.2	1795	1597.42	64820	400.571	ENSRNOG00000049402.2	Nbl1	NBL1, DAN family BMP antagonist [Source:RGD Symbol;Acc:3151]
ENSRNOT00000008736.6	1151	953.422	38642.9	400.105	ENSRNOG00000006542.6	Atp6v0c	ATPase H+ transporting V0 subunit C [Source:RGD Symbol;Acc:621394]
ENSRNOT00000003219.3	2016	1818.42	73520	399.117	ENSRNOG00000002358.5	Scpep1	serine carboxypeptidase 1 [Source:RGD Symbol;Acc:620067]
ENSRNOT00000059599.3	1773	1575.42	63516	397.993	ENSRNOG00000029941.3	Grina	glutamate ionotropic receptor NMDA type subunit associated protein 1 [Source:RGD Symbol;Acc:628873]
ENSRNOT00000015875.7	1504	1306.42	52569.9	397.231	ENSRNOG00000023786.6	Ybx1	Y box binding protein 1 [Source:RGD Symbol;Acc:61843]
ENSRNOT00000031555.5	879	681.422	27397	396.896	ENSRNOG00000023546.5	Hspb1	heat shock protein family B (small) member 1 [Source:RGD Symbol;Acc:61306]
ENSRNOT00000086986.1	2661	2463.42	98775.5	395.822	ENSRNOG00000019834.6	Hsp90ab1	heat shock protein 90 alpha family class B member 1 [Source:RGD Symbol;Acc:1303075]
ENSRNOT00000017174.5	1579	1381.42	55389	395.81	ENSRNOG00000012772.5	Nqo1	NAD(P)H quinone dehydrogenase 1 [Source:RGD Symbol;Acc:2503]
ENSRNOT00000024261.4	3191	2993.42	119711	394.782	ENSRNOG00000017952.4	Septin2	septin 2 [Source:RGD Symbol;Acc:620056]
ENSRNOT00000079005.1	798	600.458	23977.9	394.201	ENSRNOG00000060518.1	AABR07015057.1
ENSRNOT00000047593.5	2048	1850.42	73885.5	394.165	ENSRNOG00000034093.4	AABR07011951.1
ENSRNOT00000023535.5	1921	1723.42	68800	394.082	ENSRNOG00000017359.5	Itm2c	integral membrane protein 2C [Source:RGD Symbol;Acc:1309503]
ENSRNOT00000021954.7	1605	1407.42	56123	393.646	ENSRNOG00000016257.7	Cotl1	coactosin-like F-actin binding protein 1 [Source:RGD Symbol;Acc:1305498]
ENSRNOT00000078827.1	225	71.8083	2860	393.171	ENSRNOG00000061514.1	AABR07028795.1
ENSRNOT00000026783.5	3206	3008.42	119744	392.92	ENSRNOG00000019778.6	Cavin1	caveolae associated protein 1 [Source:RGD Symbol;Acc:1307685]
ENSRNOT00000004278.6	789	591.458	23260.1	388.219	ENSRNOG00000003201.9	Rps4x	ribosomal protein S4, X-linked [Source:RGD Symbol;Acc:2324318]
ENSRNOT00000047553.4	642	444.667	17447.1	387.327	ENSRNOG00000034130.4	LOC108349189	high mobility group protein B1 pseudogene [Source:RGD Symbol;Acc:11468204]
ENSRNOT00000058943.4	1531	1333.42	52288.7	387.106	ENSRNOG00000017127.6	Rpl28	ribosomal protein L28 [Source:RGD Symbol;Acc:621193]
ENSRNOT00000087247.1	666	468.631	18356	386.666	ENSRNOG00000054945.1	AABR07015081.2
ENSRNOT00000077306.1	666	468.631	18356	386.666	ENSRNOG00000060518.1	AABR07015057.1
ENSRNOT00000017692.5	1603	1405.42	54793	384.865	ENSRNOG00000012623.5	Arf4	ADP-ribosylation factor 4 [Source:RGD Symbol;Acc:621275]
ENSRNOT00000015886.6	1744	1546.42	60043	383.287	ENSRNOG00000011632.6	Cct5	chaperonin containing TCP1 subunit 5 [Source:RGD Symbol;Acc:735161]
ENSRNOT00000042736.1	498	303.095	11764.8	383.174	ENSRNOG00000028993.1	LOC102555453	60S ribosomal protein L12-like [Source:RGD Symbol;Acc:7600399]
ENSRNOT00000002809.4	1102	904.422	35105.6	383.173	ENSRNOG00000002050.4	Igfbp7	insulin-like growth factor binding protein 7 [Source:RGD Symbol;Acc:1306201]
ENSRNOT00000010811.7	2890	2692.42	104159	381.895	ENSRNOG00000007393.7	Ndrg1	N-myc downstream regulated 1 [Source:RGD Symbol;Acc:1307303]
ENSRNOT00000067854.2	658	460.649	17781	381.044	ENSRNOG00000025715.5	Dynlrb1	dynein light chain roadblock-type 1 [Source:RGD Symbol;Acc:619910]
ENSRNOT00000089759.1	1554	1356.42	52096.8	379.145	ENSRNOG00000055319.1	Mrfap1	Morf4 family associated protein 1 [Source:RGD Symbol;Acc:628631]
ENSRNOT00000015476.5	1818	1620.42	62222	379.058	ENSRNOG00000011501.5	Atp1b3	ATPase Na+/K+ transporting subunit beta 3 [Source:RGD Symbol;Acc:2172]
ENSRNOT00000027215.6	1589	1391.42	53421	379.003	ENSRNOG00000019981.6	Sdf4	stromal cell derived factor 4 [Source:RGD Symbol;Acc:621521]
ENSRNOT00000011675.4	3326	3128.42	119878	378.272	ENSRNOG00000008678.5	Antxr1	ANTXR cell adhesion molecule 1 [Source:RGD Symbol;Acc:1307144]
ENSRNOT00000032026.3	601	403.943	15475.6	378.196	ENSRNOG00000024309.4	Cox6b1	cytochrome c oxidase subunit 6B1 [Source:RGD Symbol;Acc:1584097]
ENSRNOT00000006787.7	1226	1028.42	39384.2	378.042	ENSRNOG00000005039.8	Tfpi	tissue factor pathway inhibitor [Source:RGD Symbol;Acc:61914]
ENSRNOT00000087731.1	639	441.667	16913	378.02	ENSRNOG00000054978.1	H1f2	H1.2 linker histone, cluster member [Source:RGD Symbol;Acc:1587893]
ENSRNOT00000088473.1	1426	1228.42	46984.7	377.571	ENSRNOG00000052802.1	Aldoa	aldolase, fructose-bisphosphate A [Source:RGD Symbol;Acc:2089]
ENSRNOT00000077786.1	2099	1901.42	71870	373.129	ENSRNOG00000051650.1	Ywhaq	tyrosine 3-monooxygenase/tryptophan 5-monooxygenase activation protein, theta [Source:RGD Symbol;Acc:3979]
ENSRNOT00000019772.6	8331	8133.42	305004	370.187	ENSRNOG00000014288.8	Fn1	fibronectin 1 [Source:RGD Symbol;Acc:2624]
ENSRNOT00000015325.6	906	708.422	26512.7	369.446	ENSRNOG00000011175.8	Hnrnpa2b1	heterogeneous nuclear ribonucleoprotein A2/B1 [Source:RGD Symbol;Acc:1310403]
ENSRNOT00000045256.3	1067	869.422	32462.3	368.585	ENSRNOG00000039496.2	Plp2	proteolipid protein 2 [Source:RGD Symbol;Acc:1587363]
ENSRNOT00000018711.4	2560	2362.42	88136	368.286	ENSRNOG00000013492.4	Cap1	cyclase associated actin cytoskeleton regulatory protein 1 [Source:RGD Symbol;Acc:620309]
ENSRNOT00000078250.1	2558	2360.42	88041	368.201	ENSRNOG00000056836.1	Cav1	caveolin 1 [Source:RGD Symbol;Acc:2280]
ENSRNOT00000012363.4	2926	2728.42	101573	367.499	ENSRNOG00000009094.4	Nudt4	nudix hydrolase 4 [Source:RGD Symbol;Acc:621355]
ENSRNOT00000001066.6	1493	1295.42	48095	366.504	ENSRNOG00000029360.5	Serinc1	serine incorporator 1 [Source:RGD Symbol;Acc:727843]
ENSRNOT00000001916.2	3063	2865.42	106238	366.001	ENSRNOG00000001414.2	Serpine1	serpin family E member 1 [Source:RGD Symbol;Acc:3249]
ENSRNOT00000025888.7	405	215.535	7984.02	365.674	ENSRNOG00000019106.7	Rps17	ribosomal protein S17 [Source:RGD Symbol;Acc:62027]
ENSRNOT00000014704.4	1290	1092.42	40257	363.782	ENSRNOG00000010830.4	Slc25a4	solute carrier family 25 member 4 [Source:RGD Symbol;Acc:620352]
ENSRNOT00000014552.7	5879	5681.42	208569	362.395	ENSRNOG00000010529.7	Thbs2	thrombospondin 2 [Source:RGD Symbol;Acc:1310979]
ENSRNOT00000014439.4	1591	1393.42	50997	361.286	ENSRNOG00000010747.4	Dap	death-associated protein [Source:RGD Symbol;Acc:620641]
ENSRNOT00000022134.7	1102	904.422	33047.6	360.71	ENSRNOG00000016410.8	Prelid1	PRELI domain containing 1 [Source:RGD Symbol;Acc:1308082]
ENSRNOT00000081787.1	870	672.422	24529.1	360.106	ENSRNOG00000025892.6	Set	SET nuclear proto-oncogene [Source:RGD Symbol;Acc:1307467]
ENSRNOT00000017301.4	300	126.212	4572	357.598	ENSRNOG00000012748.4	Vamp8	vesicle-associated membrane protein 8 [Source:RGD Symbol;Acc:620421]
ENSRNOT00000011937.5	1422	1224.42	44333	357.426	ENSRNOG00000008994.5	Arpc4	actin related protein 2/3 complex, subunit 4 [Source:RGD Symbol;Acc:1310096]
ENSRNOT00000060838.4	4333	4135.42	149414	356.665	ENSRNOG00000039668.4	Col8a1	collagen type VIII alpha 1 chain [Source:RGD Symbol;Acc:1309361]
ENSRNOT00000025980.7	2000	1802.42	65021.9	356.117	ENSRNOG00000019113.7	Hnrnpk	heterogeneous nuclear ribonucleoprotein K [Source:RGD Symbol;Acc:71058]
ENSRNOT00000003247.5	1809	1611.42	57945	354.974	ENSRNOG00000002389.5	Morf4l2	mortality factor 4 like 2 [Source:RGD Symbol;Acc:1359471]
ENSRNOT00000038480.4	1724	1526.42	54812.1	354.48	ENSRNOG00000009779.5	Krt8	keratin 8 [Source:RGD Symbol;Acc:2984]
ENSRNOT00000001247.7	1104	906.422	32508.4	354.042	ENSRNOG00000000938.7	Ran	RAN, member RAS oncogene family [Source:RGD Symbol;Acc:620367]
ENSRNOT00000080218.1	2386	2188.42	78289.4	353.152	ENSRNOG00000008639.7	Pabpc1	poly(A) binding protein, cytoplasmic 1 [Source:RGD Symbol;Acc:619838]
ENSRNOT00000090727.1	4188	3990.42	142459	352.42	ENSRNOG00000060775.1	Lmo7	LIM domain 7 [Source:RGD Symbol;Acc:1302984]
ENSRNOT00000011991.5	1745	1547.42	55126	351.672	ENSRNOG00000008937.5	Csrp1	cysteine and glycine-rich protein 1 [Source:RGD Symbol;Acc:62053]
ENSRNOT00000061231.4	903	705.422	24769	346.616	ENSRNOG00000039876.4	LOC681410	heterogeneous nuclear ribonucleoprotein A0 [Source:MGI Symbol;Acc:MGI:1924384]
ENSRNOT00000071796.2	589	392.087	13740.5	345.946	ENSRNOG00000049229.2	Pomp	proteasome maturation protein [Source:RGD Symbol;Acc:1305831]
ENSRNOT00000010932.5	3836	3638.42	127258	345.272	ENSRNOG00000008246.5	Emilin1	elastin microfibril interfacer 1 [Source:RGD Symbol;Acc:1311209]
ENSRNOT00000050090.3	240	82.0006	2862.28	344.576	ENSRNOG00000032740.3	Tmem258b	transmembrane protein 258 B [Source:RGD Symbol;Acc:1586604]
ENSRNOT00000009132.6	5081	4883.42	169989	343.626	ENSRNOG00000006526.7	Sema3c	semaphorin 3C [Source:RGD Symbol;Acc:1309343]
ENSRNOT00000009404.6	2333	2135.42	74296.6	343.459	ENSRNOG00000006462.7	Ero1a	endoplasmic reticulum oxidoreductase 1 alpha [Source:RGD Symbol;Acc:621713]
ENSRNOT00000007821.5	3004	2806.42	97633	343.426	ENSRNOG00000005478.5	Fkbp9	FKBP prolyl isomerase 9 [Source:RGD Symbol;Acc:1549757]
ENSRNOT00000028881.2	2142	1944.42	67609	343.245	ENSRNOG00000021259.2	Prnp	prion protein [Source:RGD Symbol;Acc:3410]
ENSRNOT00000041210.5	718	520.514	18059.9	342.509	ENSRNOG00000029115.5	LOC102555453	60S ribosomal protein L12-like [Source:RGD Symbol;Acc:7600399]
ENSRNOT00000010895.6	2857	2659.42	92049	341.681	ENSRNOG00000007519.6	Tmem43	transmembrane protein 43 [Source:RGD Symbol;Acc:1549711]
ENSRNOT00000008329.7	562	365.397	12583	339.945	ENSRNOG00000006345.7	Sec61b	Sec61 translocon beta subunit [Source:RGD Symbol;Acc:1304997]
ENSRNOT00000033450.3	1533	1335.42	45912	339.388	ENSRNOG00000021438.3	Tuba1c	tubulin, alpha 1C [Source:RGD Symbol;Acc:1307226]
ENSRNOT00000077903.1	452	259.167	8882.8	338.346	ENSRNOG00000008605.4	Ost4	oligosaccharyltransferase complex subunit 4, non-catalytic [Source:RGD Symbol;Acc:2300150]
ENSRNOT00000027749.4	463	269.546	9218	337.593	ENSRNOG00000020442.4	Ubl5	ubiquitin-like 5 [Source:RGD Symbol;Acc:1564644]
ENSRNOT00000022056.7	2446	2248.42	76717	336.824	ENSRNOG00000016456.7	Il33	interleukin 33 [Source:RGD Symbol;Acc:1311155]
ENSRNOT00000036366.6	1067	869.422	29619.1	336.303	ENSRNOG00000014635.8	Clta	clathrin, light chain A [Source:RGD Symbol;Acc:70919]
ENSRNOT00000022747.5	508	312.755	10639	335.804	ENSRNOG00000016952.5	Uqcr11	ubiquinol-cytochrome c reductase, complex III subunit XI [Source:RGD Symbol;Acc:1590985]
ENSRNOT00000027760.7	1294	1096.42	37279	335.642	ENSRNOG00000020451.7	Cd81	Cd81 molecule [Source:RGD Symbol;Acc:2315]
ENSRNOT00000038691.5	348	165.488	5626.41	335.626	ENSRNOG00000002116.6	Rplp2	ribosomal protein lateral stalk subunit P2 [Source:RGD Symbol;Acc:621775]
ENSRNOT00000057030.2	348	165.488	5626.41	335.626	ENSRNOG00000037607.2	LOC100911575	60S acidic ribosomal protein P2-like [Source:RGD Symbol;Acc:6491911]
ENSRNOT00000044222.4	519	323.327	10985.9	335.417	ENSRNOG00000033517.4	LOC100360791	tumor protein, translationally-controlled 1 [Source:RGD Symbol;Acc:2321467]
ENSRNOT00000086590.1	609	411.878	13985	335.184	ENSRNOG00000053086.1	Selenop	selenoprotein P [Source:RGD Symbol;Acc:3660]
ENSRNOT00000000334.6	2822	2624.42	88987.1	334.721	ENSRNOG00000000304.7	Cd164	CD164 molecule [Source:RGD Symbol;Acc:70942]
ENSRNOT00000071617.1	258	94.4463	3200	334.468	ENSRNOG00000046560.1	AC109096.1
ENSRNOT00000004094.6	957	759.422	25729	334.449	ENSRNOG00000003064.6	Bst1	bone marrow stromal cell antigen 1 [Source:RGD Symbol;Acc:620344]
ENSRNOT00000085644.1	622	424.745	14348.4	333.477	ENSRNOG00000054140.1	Myl6	myosin light chain 6 [Source:RGD Symbol;Acc:1589019]
ENSRNOT00000011508.6	1074	876.422	29571	333.075	ENSRNOG00000008163.6	Atp6v1g1	ATPase H+ transporting V1 subunit G1 [Source:RGD Symbol;Acc:1310088]
ENSRNOT00000007367.6	1185	987.422	33193.7	331.85	ENSRNOG00000005387.6	Rbm3	RNA binding motif protein 3 [Source:RGD Symbol;Acc:620145]
ENSRNOT00000033056.5	1592	1394.42	46850.9	331.675	ENSRNOG00000003645.8	Hnrnpab	heterogeneous nuclear ribonucleoprotein A/B [Source:RGD Symbol;Acc:69255]
ENSRNOT00000030558.5	685	487.554	16351	331.063	ENSRNOG00000022860.5	Swi5	SWI5 homologous recombination repair protein [Source:RGD Symbol;Acc:1559966]
ENSRNOT00000043250.5	498	303.095	10141.8	330.315	ENSRNOG00000052141.1	Rps10	ribosomal protein S10 [Source:RGD Symbol;Acc:621024]
ENSRNOT00000002924.5	2671	2473.42	82763	330.315	ENSRNOG00000002125.5	Ccni	cyclin I [Source:RGD Symbol;Acc:1309209]
ENSRNOT00000036140.6	1393	1195.42	39978	330.133	ENSRNOG00000021882.6	Tmed9	transmembrane p24 trafficking protein 9 [Source:RGD Symbol;Acc:1307627]
ENSRNOT00000025495.7	306	131.035	4359.76	328.447	ENSRNOG00000018775.7	Cystm1	cysteine-rich transmembrane module containing 1 [Source:RGD Symbol;Acc:2323233]
ENSRNOT00000025525.4	600	402.951	13387.4	327.97	ENSRNOG00000018816.4	Cox5a	cytochrome c oxidase subunit 5A [Source:RGD Symbol;Acc:620607]
ENSRNOT00000023567.8	1758	1560.42	51606.1	326.474	ENSRNOG00000017441.8	Tpm3	tropomyosin 3 [Source:RGD Symbol;Acc:621546]
ENSRNOT00000025282.6	1392	1194.42	39394	325.583	ENSRNOG00000018708.6	Ppp1ca	protein phosphatase 1 catalytic subunit alpha [Source:RGD Symbol;Acc:3375]
ENSRNOT00000010101.5	1984	1786.42	58839	325.14	ENSRNOG00000007089.5	Lgmn	legumain [Source:RGD Symbol;Acc:619832]
ENSRNOT00000008728.5	2329	2131.42	69782	323.194	ENSRNOG00000006228.5	Pdia4	protein disulfide isomerase family A, member 4 [Source:RGD Symbol;Acc:619835]
ENSRNOT00000001054.4	3127	2929.42	95043.5	320.28	ENSRNOG00000000805.6	Gja1	gap junction protein, alpha 1 [Source:RGD Symbol;Acc:2690]
ENSRNOT00000084272.1	360	175.749	5701	320.22	ENSRNOG00000057499.1	AABR07068587.1
ENSRNOT00000042547.4	860	662.422	21482.2	320.136	ENSRNOG00000031864.4	AABR07021871.1
ENSRNOT00000031891.4	1814	1616.42	52225	318.943	ENSRNOG00000023360.4	Fus	FUS RNA binding protein [Source:RGD Symbol;Acc:1308864]
ENSRNOT00000024952.6	2169	1971.42	63595	318.444	ENSRNOG00000018091.6	Gdi2	GDP dissociation inhibitor 2 [Source:RGD Symbol;Acc:61802]
ENSRNOT00000018310.7	2620	2422.42	78137	318.417	ENSRNOG00000013469.7	Txndc5	thioredoxin domain containing 5 [Source:RGD Symbol;Acc:2323973]
ENSRNOT00000027773.7	3870	3672.42	118217	317.774	ENSRNOG00000020433.7	Actn4	actinin alpha 4 [Source:RGD Symbol;Acc:61816]
ENSRNOT00000001417.5	2078	1880.42	60501.4	317.614	ENSRNOG00000001068.7	Rac1	Rac family small GTPase 1 [Source:RGD Symbol;Acc:619755]
ENSRNOT00000082953.1	1226	1028.42	32982.9	316.597	ENSRNOG00000051615.1	Hmgn2	high mobility group nucleosomal binding domain 2 [Source:RGD Symbol;Acc:620649]
ENSRNOT00000050213.3	1499	1301.42	41666.2	316.049	ENSRNOG00000032902.3	Ybx1-ps3	Y box protein 1 related, pseudogene 3 [Source:RGD Symbol;Acc:1590933]
ENSRNOT00000007949.6	2040	1842.42	58896.9	315.568	ENSRNOG00000005871.6	Il1rn	interleukin 1 receptor antagonist [Source:RGD Symbol;Acc:621159]
ENSRNOT00000037043.3	461	267.666	8539.11	314.926	ENSRNOG00000028690.3	LOC100362366	40S ribosomal protein S17-like [Source:RGD Symbol;Acc:2318320]
ENSRNOT00000001500.6	1096	898.422	28538	313.569	ENSRNOG00000001136.6	Pebp1	phosphatidylethanolamine binding protein 1 [Source:RGD Symbol;Acc:62017]
ENSRNOT00000018562.4	1476	1278.42	40524	312.916	ENSRNOG00000013668.4	Capg	capping actin protein, gelsolin like [Source:RGD Symbol;Acc:1311724]
ENSRNOT00000079085.1	2403	2205.42	69750	312.207	ENSRNOG00000054172.1	Ctnnb1	catenin beta 1 [Source:RGD Symbol;Acc:70487]
ENSRNOT00000073028.2	699	501.535	15856	312.092	ENSRNOG00000050735.2	Cd99	CD99 molecule (Xg blood group) [Source:RGD Symbol;Acc:1594332]
ENSRNOT00000051207.3	849	651.422	20532.8	311.154	ENSRNOG00000031244.3	LOC108349606	60S ribosomal protein L7a-like [Source:RGD Symbol;Acc:11408721]
ENSRNOT00000006607.5	1670	1472.42	46169	309.534	ENSRNOG00000004959.7	Actr2	actin related protein 2 [Source:RGD Symbol;Acc:1310826]
ENSRNOT00000001664.6	633	435.676	13625.7	308.734	ENSRNOG00000001239.6	Ddt	D-dopachrome tautomerase [Source:RGD Symbol;Acc:61923]
ENSRNOT00000055302.3	1465	1267.42	39638.3	308.733	ENSRNOG00000036852.3	Pcbp2	poly(rC) binding protein 2 [Source:RGD Symbol;Acc:1309626]
ENSRNOT00000026705.6	3075	2877.42	89893.2	308.399	ENSRNOG00000019638.7	Lmna	lamin A/C [Source:RGD Symbol;Acc:620456]
ENSRNOT00000049942.4	4986	4788.42	149371	307.938	ENSRNOG00000003343.6	Canx	calnexin [Source:RGD Symbol;Acc:2266]
ENSRNOT00000010117.5	549	352.692	10988.6	307.565	ENSRNOG00000007407.6	Ndufa12	NADH:ubiquinone oxidoreductase subunit A12 [Source:RGD Symbol;Acc:1311462]
ENSRNOT00000003787.7	1659	1461.42	45507.2	307.393	ENSRNOG00000002642.7	Ptges3	prostaglandin E synthase 3 [Source:RGD Symbol;Acc:1561913]
ENSRNOT00000066589.2	2227	2029.42	63190	307.373	ENSRNOG00000014525.5	Hspd1	heat shock protein family D (Hsp60) member 1 [Source:RGD Symbol;Acc:621314]
ENSRNOT00000028179.4	519	323.327	10034.1	306.356	ENSRNOG00000020771.4	Sap18	Sin3A associated protein 18 [Source:RGD Symbol;Acc:1310388]
ENSRNOT00000073270.2	744	546.503	16938.5	305.965	ENSRNOG00000049025.2	Rps6	ribosomal protein S6 [Source:RGD Symbol;Acc:3602]
ENSRNOT00000004911.5	2411	2213.42	68590.5	305.907	ENSRNOG00000003689.6	Nono	non-POU domain containing, octamer-binding [Source:RGD Symbol;Acc:1549738]
ENSRNOT00000084481.1	1410	1212.42	37554.6	305.773	ENSRNOG00000004992.7	Rab1a	RAB1A, member RAS oncogene family [Source:RGD Symbol;Acc:619736]
ENSRNOT00000074395.1	3493	3295.42	101740	304.769	ENSRNOG00000049437.1	Gpc1	glypican 1 [Source:RGD Symbol;Acc:61853]
ENSRNOT00000007583.7	1180	982.422	30322	304.684	ENSRNOG00000005513.7	Srsf5	serine and arginine rich splicing factor 5 [Source:RGD Symbol;Acc:3664]
ENSRNOT00000019265.6	1428	1230.42	37866.6	303.803	ENSRNOG00000014289.7	Arpc2	actin related protein 2/3 complex, subunit 2 [Source:RGD Symbol;Acc:1305848]
ENSRNOT00000007676.7	1214	1016.42	31236.9	303.378	ENSRNOG00000005828.7	Skp1	S-phase kinase-associated protein 1 [Source:RGD Symbol;Acc:1359648]
ENSRNOT00000024161.5	1351	1153.42	35425	303.187	ENSRNOG00000017962.5	Serpinb6a	serpin family B member 6A [Source:RGD Symbol;Acc:735108]
ENSRNOT00000022367.3	416	225.644	6907.17	302.18	ENSRNOG00000016507.3	LOC687679	similar to small nuclear ribonucleoprotein polypeptide G [Source:RGD Symbol;Acc:1583028]
ENSRNOT00000010061.3	1610	1412.42	43072	301.037	ENSRNOG00000007029.3	Dnaja1	DnaJ heat shock protein family (Hsp40) member A1 [Source:RGD Symbol;Acc:620942]
ENSRNOT00000067228.3	1774	1576.42	47790	299.264	ENSRNOG00000015079.7	Ddost	dolichyl-diphosphooligosaccharide--protein glycosyltransferase non-catalytic subunit [Source:RGD Symbol;Acc:1308970]
ENSRNOT00000050059.4	2414	2216.42	66869.8	297.829	ENSRNOG00000001454.7	Eif4h	eukaryotic translation initiation factor 4H [Source:RGD Symbol;Acc:1359222]
ENSRNOT00000015828.7	1717	1519.42	45784.6	297.461	ENSRNOG00000011814.7	Cbx3	chromobox 3 [Source:RGD Symbol;Acc:1549705]
ENSRNOT00000048125.4	1192	994.422	29734.3	295.173	ENSRNOG00000015733.6	Myl12b	myosin light chain 12B [Source:RGD Symbol;Acc:628855]
ENSRNOT00000077765.1	216	65.9083	1966	294.465	ENSRNOG00000059487.1	AABR07045405.1
ENSRNOT00000017353.5	2027	1829.42	54297	292.989	ENSRNOG00000011346.5	Ehd2	EH-domain containing 2 [Source:RGD Symbol;Acc:1560856]
ENSRNOT00000001360.3	1672	1474.42	43593.9	291.872	ENSRNOG00000001030.8	Tsc22d1	TSC22 domain family, member 1 [Source:RGD Symbol;Acc:3850]
ENSRNOT00000041264.3	2846	2648.42	78297.9	291.845	ENSRNOG00000010233.5	Cald1	caldesmon 1 [Source:RGD Symbol;Acc:2256]
ENSRNOT00000018723.6	1399	1201.42	35512	291.789	ENSRNOG00000013961.6	Ghitm	growth hormone inducible transmembrane protein [Source:RGD Symbol;Acc:1359301]
ENSRNOT00000024677.6	2538	2340.42	69108.3	291.491	ENSRNOG00000018233.6	Gas6	growth arrest specific 6 [Source:RGD Symbol;Acc:61913]
ENSRNOT00000017234.5	1816	1618.42	47760.9	291.32	ENSRNOG00000042261.3	Hdgf	heparin binding growth factor [Source:RGD Symbol;Acc:70961]
ENSRNOT00000010185.6	1242	1044.42	30771	290.841	ENSRNOG00000006818.6	Arl6ip5	ADP-ribosylation factor like GTPase 6 interacting protein 5 [Source:RGD Symbol;Acc:708572]
ENSRNOT00000083446.1	2867	2669.42	78610	290.703	ENSRNOG00000057367.1	Glud1	glutamate dehydrogenase 1 [Source:RGD Symbol;Acc:2708]
ENSRNOT00000071153.1	1434	1236.42	36349	290.212	ENSRNOG00000049876.1	Prkar1a	protein kinase cAMP-dependent type I regulatory subunit alpha [Source:RGD Symbol;Acc:3391]
ENSRNOT00000018846.6	3828	3630.42	106530	289.671	ENSRNOG00000013720.6	Aebp1	AE binding protein 1 [Source:RGD Symbol;Acc:1306922]
ENSRNOT00000092993.1	1476	1278.42	37466.4	289.306	ENSRNOG00000019638.7	Lmna	lamin A/C [Source:RGD Symbol;Acc:620456]
ENSRNOT00000022532.6	2232	2034.42	59538	288.897	ENSRNOG00000016704.6	Pcyox1	prenylcysteine oxidase 1 [Source:RGD Symbol;Acc:628652]
ENSRNOT00000022977.5	946	748.422	21867.7	288.434	ENSRNOG00000016930.5	Ube2s	ubiquitin-conjugating enzyme E2S [Source:RGD Symbol;Acc:1564746]
ENSRNOT00000021862.6	2077	1879.42	54815	287.915	ENSRNOG00000016064.6	Tkt	transketolase [Source:RGD Symbol;Acc:621036]
ENSRNOT00000006859.5	930	732.422	21333.6	287.536	ENSRNOG00000005116.5	LOC108353446	40S ribosomal protein S2 pseudogene [Source:RGD Symbol;Acc:11481307]
ENSRNOT00000046102.2	3194	2996.42	86971	286.524	ENSRNOG00000034242.3	Vcp	valosin-containing protein [Source:RGD Symbol;Acc:621595]
ENSRNOT00000086377.1	4465	4267.42	123753	286.273	ENSRNOG00000010233.5	Cald1	caldesmon 1 [Source:RGD Symbol;Acc:2256]
ENSRNOT00000007320.5	4501	4303.42	124784	286.242	ENSRNOG00000020346.7	Best1	bestrophin 1 [Source:RGD Symbol;Acc:1311656]
ENSRNOT00000076181.1	3801	3603.42	104368	285.918	ENSRNOG00000030118.7	Msn	moesin [Source:RGD Symbol;Acc:621260]
ENSRNOT00000064931.2	308	132.651	3840	285.765	ENSRNOG00000042869.2	Atp5md	ATP synthase membrane subunit DAPIT [Source:RGD Symbol;Acc:631426]
ENSRNOT00000025925.3	1662	1464.42	42364.1	285.576	ENSRNOG00000019070.4	St13	ST13, Hsp70 interacting protein [Source:RGD Symbol;Acc:621312]
ENSRNOT00000047717.4	1639	1441.42	41685	285.482	ENSRNOG00000031965.4	Impdh2	inosine monophosphate dehydrogenase 2 [Source:RGD Symbol;Acc:735092]
ENSRNOT00000091288.1	276	107.682	3109	285.016	ENSRNOG00000060293.1	Ndufa3	NADH:ubiquinone oxidoreductase subunit A3 [Source:RGD Symbol;Acc:1588687]
ENSRNOT00000050269.5	1636	1438.42	41487.5	284.722	ENSRNOG00000001889.7	Comt	catechol-O-methyltransferase [Source:RGD Symbol;Acc:2379]
ENSRNOT00000008522.5	621	423.762	12216	284.575	ENSRNOG00000005963.7	Rab2a	RAB2A, member RAS oncogene family [Source:RGD Symbol;Acc:68323]
ENSRNOT00000014346.6	1805	1607.42	46206	283.765	ENSRNOG00000010666.6	Ccn5	cellular communication network factor 5 [Source:RGD Symbol;Acc:621867]
ENSRNOT00000017409.7	1299	1101.42	31509	282.404	ENSRNOG00000012738.7	Eif3m	eukaryotic translation initiation factor 3, subunit M [Source:RGD Symbol;Acc:1565840]
ENSRNOT00000026696.6	2834	2636.42	74842	280.234	ENSRNOG00000019525.6	Hspa9	heat shock protein family A (Hsp70) member 9 [Source:RGD Symbol;Acc:1311806]
ENSRNOT00000020670.4	799	601.458	17045.7	279.769	ENSRNOG00000014625.4	Atp5f1d	ATP synthase F1 subunit delta [Source:RGD Symbol;Acc:621372]
ENSRNOT00000010601.6	2548	2350.42	66244	278.221	ENSRNOG00000008016.6	Ckap4	cytoskeleton-associated protein 4 [Source:RGD Symbol;Acc:1311989]
ENSRNOT00000020681.6	1604	1406.42	39604.5	277.983	ENSRNOG00000014765.6	Vapa	VAMP associated protein A [Source:RGD Symbol;Acc:61803]
ENSRNOT00000064418.2	505	309.811	8714.95	277.688	ENSRNOG00000042696.2	Micos10	mitochondrial contact site and cristae organizing system subunit 10 [Source:RGD Symbol;Acc:1560187]
ENSRNOT00000065065.2	1271	1073.42	30120	276.997	ENSRNOG00000043377.4	Fdps	farnesyl diphosphate synthase [Source:RGD Symbol;Acc:68953]
ENSRNOT00000093376.1	883	685.422	19208	276.639	ENSRNOG00000013604.7	Gpx4	glutathione peroxidase 4 [Source:RGD Symbol;Acc:69226]
ENSRNOT00000008041.7	3613	3415.42	95645.1	276.445	ENSRNOG00000005796.7	Ctnna1	catenin alpha 1 [Source:RGD Symbol;Acc:1359485]
ENSRNOT00000028740.5	1961	1763.42	49358	276.306	ENSRNOG00000021166.7	Ecm1	extracellular matrix protein 1 [Source:RGD Symbol;Acc:620357]
ENSRNOT00000067011.2	881	683.422	19110.3	276.038	ENSRNOG00000003772.7	Csrp2	cysteine and glycine-rich protein 2 [Source:RGD Symbol;Acc:61950]
ENSRNOT00000007870.5	1529	1331.42	37179.4	275.662	ENSRNOG00000005861.6	Hsd11b1	hydroxysteroid 11-beta dehydrogenase 1 [Source:RGD Symbol;Acc:2834]
ENSRNOT00000022117.4	1979	1781.42	49708	275.454	ENSRNOG00000016207.4	Galnt1	polypeptide N-acetylgalactosaminyltransferase 1 [Source:RGD Symbol;Acc:620358]
ENSRNOT00000052231.4	689	491.554	13630.4	273.733	ENSRNOG00000028449.4	Rpl9	ribosomal protein L9 [Source:RGD Symbol;Acc:62049]
ENSRNOT00000087522.1	880	682.422	18921.5	273.711	ENSRNOG00000020495.7	Eif3k	eukaryotic translation initiation factor 3, subunit K [Source:RGD Symbol;Acc:1309221]
ENSRNOT00000079889.1	8412	8214.42	227072	272.883	ENSRNOG00000054890.1	Flna	filamin A [Source:RGD Symbol;Acc:1560614]
ENSRNOT00000012847.3	2110	1912.42	52789	272.489	ENSRNOG00000009642.3	Cct4	chaperonin containing TCP1 subunit 4 [Source:RGD Symbol;Acc:727937]
ENSRNOT00000025988.4	640	442.667	12210.6	272.301	ENSRNOG00000019206.4	Nupr1	nuclear protein 1, transcriptional regulator [Source:RGD Symbol;Acc:69363]
ENSRNOT00000018454.5	3032	2834.42	78055	271.848	ENSRNOG00000013743.5	Sec61a1	Sec61 translocon alpha 1 subunit [Source:RGD Symbol;Acc:68321]
ENSRNOT00000012879.3	1338	1140.42	31325.8	271.16	ENSRNOG00000009513.3	Akr1b1	aldo-keto reductase family 1 member B [Source:RGD Symbol;Acc:2092]
ENSRNOT00000075602.2	459	265.779	7299	271.102	ENSRNOG00000047250.2	Gmfb	glia maturation factor, beta [Source:RGD Symbol;Acc:70910]
ENSRNOT00000044582.3	297	123.853	3398.32	270.861	ENSRNOG00000031053.3	Mt-nd4l	mitochondrially encoded NADH 4L dehydrogenase [Source:RGD Symbol;Acc:620494]
ENSRNOT00000086790.1	1949	1751.42	47956	270.297	ENSRNOG00000056940.1	Cited2	Cbp/p300-interacting transactivator, with Glu/Asp-rich carboxy-terminal domain, 2 [Source:RGD Symbol;Acc:620112]
ENSRNOT00000044477.3	3344	3146.42	86126.7	270.216	ENSRNOG00000033790.4	Hnrnpu	heterogeneous nuclear ribonucleoprotein U [Source:RGD Symbol;Acc:620372]
ENSRNOT00000042925.5	1581	1383.42	37843	270.035	ENSRNOG00000001465.7	Ids	iduronate 2-sulfatase [Source:RGD Symbol;Acc:1560491]
ENSRNOT00000028188.7	4236	4038.42	110383	269.824	ENSRNOG00000020715.7	Ddb1	damage-specific DNA binding protein 1 [Source:RGD Symbol;Acc:621889]
ENSRNOT00000015579.6	1990	1792.42	48871	269.154	ENSRNOG00000011559.7	Cnn3	calponin 3 [Source:RGD Symbol;Acc:71044]
ENSRNOT00000028084.5	2611	2413.42	65774	269.036	ENSRNOG00000020684.5	Vat1	vesicle amine transport 1 [Source:RGD Symbol;Acc:1308943]
ENSRNOT00000060282.1	321	143.173	3896	268.625	ENSRNOG00000039336.1	Hrct1	histidine rich carboxyl terminus 1 [Source:RGD Symbol;Acc:2323278]
ENSRNOT00000006239.7	858	660.422	17971	268.621	ENSRNOG00000004628.7	Dazap2	DAZ associated protein 2 [Source:RGD Symbol;Acc:1307407]
ENSRNOT00000064068.3	1785	1587.42	43046.9	267.694	ENSRNOG00000028062.7	Arpc5	actin related protein 2/3 complex, subunit 5 [Source:RGD Symbol;Acc:1311791]
ENSRNOT00000065304.4	1401	1203.42	32561.7	267.103	ENSRNOG00000017801.7	Atf4	activating transcription factor 4 [Source:RGD Symbol;Acc:621863]
ENSRNOT00000027028.6	399	210.055	5668	266.37	ENSRNOG00000019936.7	Anapc15	anaphase promoting complex subunit 15 [Source:RGD Symbol;Acc:1311634]
ENSRNOT00000060168.2	3071	2873.42	77526	266.341	ENSRNOG00000027520.5	Pls3	plastin 3 [Source:RGD Symbol;Acc:621409]
ENSRNOT00000012608.4	1497	1299.42	35016	266.015	ENSRNOG00000008822.5	Fkbp1a	FKBP prolyl isomerase 1A [Source:RGD Symbol;Acc:2617]
ENSRNOT00000004520.6	2089	1891.42	50957.4	265.955	ENSRNOG00000003206.7	Actr3	actin related protein 3 [Source:RGD Symbol;Acc:71024]
ENSRNOT00000012455.5	1666	1468.42	39469	265.335	ENSRNOG00000009325.5	Fuca1	alpha-L-fucosidase 1 [Source:RGD Symbol;Acc:2636]
ENSRNOT00000008477.5	1800	1602.42	42969.5	264.712	ENSRNOG00000006375.6	Vdac1	voltage-dependent anion channel 1 [Source:RGD Symbol;Acc:621575]
ENSRNOT00000021734.5	755	557.481	14917	264.144	ENSRNOG00000015967.5	Sh3bgrl3	SH3 domain binding glutamate-rich protein like 3 [Source:RGD Symbol;Acc:1308118]
ENSRNOT00000007623.7	943	745.422	19891	263.417	ENSRNOG00000005763.7	Arl1	ADP-ribosylation factor like GTPase 1 [Source:RGD Symbol;Acc:621326]
ENSRNOT00000041638.6	2336	2138.42	56980.6	263.041	ENSRNOG00000004621.8	Rtn4	reticulon 4 [Source:RGD Symbol;Acc:620989]
ENSRNOT00000024464.4	1154	956.422	25424	262.412	ENSRNOG00000018109.4	Clic4	chloride intracellular channel 4 [Source:RGD Symbol;Acc:61857]
ENSRNOT00000048554.5	1617	1419.42	37690.8	262.128	ENSRNOG00000025274.6	Hexb	hexosaminidase subunit beta [Source:RGD Symbol;Acc:1307607]
ENSRNOT00000011429.7	1313	1115.42	29533	261.371	ENSRNOG00000008103.7	Mdh1	malate dehydrogenase 1 [Source:RGD Symbol;Acc:3072]
ENSRNOT00000011580.6	2653	2455.42	64897.7	260.911	ENSRNOG00000008676.6	Emp1	epithelial membrane protein 1 [Source:RGD Symbol;Acc:2552]
ENSRNOT00000012295.6	1858	1660.42	43793.2	260.362	ENSRNOG00000009029.7	Nptn	neuroplastin [Source:RGD Symbol;Acc:620296]
ENSRNOT00000002447.6	1758	1560.42	41051.1	259.7	ENSRNOG00000046836.1	AC133403.1
ENSRNOT00000050204.4	932	734.422	19316	259.634	ENSRNOG00000031889.4	AABR07065438.1	ribosomal protein L6, pseudo 1 [Source:NCBI gene;Acc:500714]
ENSRNOT00000058092.4	1800	1602.42	42028.9	258.917	ENSRNOG00000001709.7	Ap2m1	adaptor related protein complex 2 subunit mu 1 [Source:RGD Symbol;Acc:620135]
ENSRNOT00000006355.5	1147	949.422	24894	258.836	ENSRNOG00000004791.5	Arf6	ADP-ribosylation factor 6 [Source:RGD Symbol;Acc:621279]
ENSRNOT00000014817.6	1427	1229.42	32217	258.686	ENSRNOG00000011020.6	Eif3l	eukaryotic translation initiation factor 3, subunit L [Source:RGD Symbol;Acc:1308230]
ENSRNOT00000027734.5	763	565.481	14817	258.661	ENSRNOG00000020460.5	Banf1	barrier to autointegration factor 1 [Source:RGD Symbol;Acc:620662]
ENSRNOT00000071913.2	375	188.817	4936	258.062	ENSRNOG00000049912.2	Atp5f1e	ATP synthase F1 subunit epsilon [Source:RGD Symbol;Acc:621374]
ENSRNOT00000015808.7	1312	1114.42	29132	258.054	ENSRNOG00000011857.7	Mtpn	myotrophin [Source:RGD Symbol;Acc:619806]
ENSRNOT00000050302.4	1013	815.422	21314	258.031	ENSRNOG00000034198.4	Tceal9	transcription elongation factor A like 9 [Source:RGD Symbol;Acc:1592975]
ENSRNOT00000093466.1	328	148.963	3893	257.986	ENSRNOG00000062276.1	AABR07044631.2
ENSRNOT00000028627.4	1441	1243.42	32451	257.632	ENSRNOG00000021082.4	Kdelr1	KDEL endoplasmic reticulum protein retention receptor 1 [Source:RGD Symbol;Acc:1306764]
ENSRNOT00000009152.5	602	404.919	10506	256.129	ENSRNOG00000006762.5	Snu13	small nuclear ribonucleoprotein 13 [Source:RGD Symbol;Acc:1303103]
ENSRNOT00000074415.2	1113	915.422	23711	255.693	ENSRNOG00000050044.2	Ptp4a2	protein tyrosine phosphatase 4A2 [Source:RGD Symbol;Acc:619786]
ENSRNOT00000019519.6	4098	3900.42	100891	255.347	ENSRNOG00000013994.6	Enpp1	ectonucleotide pyrophosphatase/phosphodiesterase 1 [Source:RGD Symbol;Acc:628825]
ENSRNOT00000037946.5	1992	1794.42	46338	254.919	ENSRNOG00000021317.5	Cct2	chaperonin containing TCP1 subunit 2 [Source:RGD Symbol;Acc:1359143]
ENSRNOT00000042562.3	6369	6171.42	159281	254.782	ENSRNOG00000031232.5	Nrp2	neuropilin 2 [Source:RGD Symbol;Acc:621442]
ENSRNOT00000068435.3	1172	974.422	25047	253.745	ENSRNOG00000029682.5	Clic1	chloride intracellular channel 1 [Source:RGD Symbol;Acc:1303043]
ENSRNOT00000078939.1	2520	2322.42	59665.7	253.614	ENSRNOG00000018991.6	Gsn	gelsolin [Source:RGD Symbol;Acc:1303089]
ENSRNOT00000010308.7	1620	1422.42	36531.5	253.529	ENSRNOG00000007330.7	Capzb	capping actin protein of muscle Z-line subunit beta [Source:RGD Symbol;Acc:1359099]
ENSRNOT00000083876.1	1396	1198.42	30703	252.907	ENSRNOG00000057347.1	Cebpb	CCAAT/enhancer binding protein beta [Source:RGD Symbol;Acc:2327]
ENSRNOT00000040430.4	3636	3438.42	87978	252.583	ENSRNOG00000030019.4	Atp1a1	ATPase Na+/K+ transporting subunit alpha 1 [Source:RGD Symbol;Acc:2167]
ENSRNOT00000011163.3	2530	2332.42	59252.1	250.776	ENSRNOG00000008450.3	LOC100359539	ribonucleotide reductase M2 polypeptide [Source:RGD Symbol;Acc:2323655]
ENSRNOT00000065962.1	376	189.714	4819	250.753	ENSRNOG00000043114.1	Tomm7	translocase of outer mitochondrial membrane 7 [Source:RGD Symbol;Acc:1591393]
ENSRNOT00000005910.4	1462	1264.42	32116	250.737	ENSRNOG00000004284.4	Btg1	BTG anti-proliferation factor 1 [Source:RGD Symbol;Acc:2224]
ENSRNOT00000011499.7	902	704.422	17881	250.581	ENSRNOG00000008673.7	Arpc3	actin related protein 2/3 complex, subunit 3 [Source:RGD Symbol;Acc:1311985]
ENSRNOT00000057158.3	464	270.497	6854.67	250.157	ENSRNOG00000037673.3	AABR07071891.1
ENSRNOT00000066133.3	2072	1874.42	47443.1	249.859	ENSRNOG00000017106.6	Csnk1a1	casein kinase 1, alpha 1 [Source:RGD Symbol;Acc:71098]
ENSRNOT00000049448.3	1410	1212.42	30653.5	249.584	ENSRNOG00000029810.3	LOC100911766	tetraspanin-4-like [Source:RGD Symbol;Acc:6490894]
ENSRNOT00000017271.3	1705	1507.42	38104	249.531	ENSRNOG00000012640.3	Dpp7	dipeptidylpeptidase 7 [Source:RGD Symbol;Acc:71073]
ENSRNOT00000066676.1	1922	1724.42	43512	249.089	ENSRNOG00000005157.6	Rbbp7	RB binding protein 7, chromatin remodeling factor [Source:RGD Symbol;Acc:620125]
ENSRNOT00000029660.5	958	760.422	19179	248.978	ENSRNOG00000021750.5	Id1	inhibitor of DNA binding 1, HLH protein [Source:RGD Symbol;Acc:2858]
ENSRNOT00000012616.7	704	506.524	12759	248.66	ENSRNOG00000009364.7	Ndufb9	NADH:ubiquinone oxidoreductase subunit B9 [Source:RGD Symbol;Acc:1307114]
ENSRNOT00000005611.5	2336	2138.42	53790.6	248.315	ENSRNOG00000004027.5	Aldh9a1	aldehyde dehydrogenase 9 family, member A1 [Source:RGD Symbol;Acc:68409]
ENSRNOT00000025887.5	1000	802.422	20156.5	247.971	ENSRNOG00000019041.6	Psme1	proteasome activator subunit 1 [Source:RGD Symbol;Acc:3429]
ENSRNOT00000016751.6	547	350.721	8799	247.663	ENSRNOG00000012550.6	Uqcrh	ubiquinol-cytochrome c reductase hinge protein [Source:RGD Symbol;Acc:1305987]
ENSRNOT00000080485.1	1402	1204.42	30119.5	246.864	ENSRNOG00000017405.7	Raly	RALY heterogeneous nuclear ribonucleoprotein [Source:RGD Symbol;Acc:1307228]
ENSRNOT00000084200.1	138	23.6481	591	246.707	ENSRNOG00000053437.1	AC103090.1
ENSRNOT00000047550.4	955	757.422	18928	246.693	ENSRNOG00000030644.4	Mt-nd1	mitochondrially encoded NADH dehydrogenase 1 [Source:RGD Symbol;Acc:620555]
ENSRNOT00000045063.3	4380	4182.42	103978	245.416	ENSRNOG00000016398.6	Clstn1	calsyntenin 1 [Source:RGD Symbol;Acc:1306458]
ENSRNOT00000089407.1	1212	1014.42	25203.5	245.263	ENSRNOG00000016896.8	Rpl3	ribosomal protein L3 [Source:RGD Symbol;Acc:735105]
ENSRNOT00000088313.1	6141	5943.42	147344	244.729	ENSRNOG00000029212.6	Vcan	versican [Source:RGD Symbol;Acc:619940]
ENSRNOT00000064700.3	1931	1733.42	42956	244.63	ENSRNOG00000009592.6	Cyb5r3	cytochrome b5 reductase 3 [Source:RGD Symbol;Acc:2502]
ENSRNOT00000045156.5	366	181.006	4460.17	243.247	ENSRNOG00000033803.5	LOC100360841	ribosomal protein L37-like [Source:RGD Symbol;Acc:2321317]
ENSRNOT00000059190.4	1931	1733.42	42709.9	243.228	ENSRNOG00000003399.8	Hnrnph1	heterogeneous nuclear ribonucleoprotein H1 [Source:RGD Symbol;Acc:620840]
ENSRNOT00000012428.7	3288	3090.42	76052	242.931	ENSRNOG00000009152.7	Caprin1	cell cycle associated protein 1 [Source:RGD Symbol;Acc:1305707]
ENSRNOT00000001695.6	3695	3497.42	85868	242.367	ENSRNOG00000001254.6	Col6a2	collagen type VI alpha 2 chain [Source:RGD Symbol;Acc:1305585]
ENSRNOT00000024863.6	1237	1039.42	25495	242.132	ENSRNOG00000018367.6	Taldo1	transaldolase 1 [Source:RGD Symbol;Acc:620674]
ENSRNOT00000075126.1	1181	983.422	24080	241.716	ENSRNOG00000048226.1	Hmgn1	high mobility group nucleosome binding domain 1 [Source:RGD Symbol;Acc:1307761]
ENSRNOT00000031005.5	14714	14516.4	354562	241.114	ENSRNOG00000025053.5	Lrp1	LDL receptor related protein 1 [Source:RGD Symbol;Acc:1307535]
ENSRNOT00000075400.2	707	509.524	12445	241.112	ENSRNOG00000050231.2	Gng12	G protein subunit gamma 12 [Source:RGD Symbol;Acc:621516]
ENSRNOT00000019486.4	1777	1579.42	38575	241.1	ENSRNOG00000013977.4	Bzw1	basic leucine zipper and W2 domains 1 [Source:RGD Symbol;Acc:735129]
ENSRNOT00000018499.5	1710	1512.42	36938	241.096	ENSRNOG00000013562.5	Ndfip1	Nedd4 family interacting protein 1 [Source:RGD Symbol;Acc:1310053]
ENSRNOT00000013224.6	1491	1293.42	31568	240.933	ENSRNOG00000009778.6	Tmem59	transmembrane protein 59 [Source:RGD Symbol;Acc:1310313]
ENSRNOT00000079456.1	17592	17394.4	424485	240.903	ENSRNOG00000057569.1	Ahnak	AHNAK nucleoprotein [Source:RGD Symbol;Acc:619779]
ENSRNOT00000003182.5	1751	1553.42	37898	240.833	ENSRNOG00000002331.5	Aldh3a1	aldehyde dehydrogenase 3 family, member A1 [Source:RGD Symbol;Acc:2088]
ENSRNOT00000002983.7	1608	1410.42	34406	240.81	ENSRNOG00000002188.7	Hpse	heparanase [Source:RGD Symbol;Acc:61969]
ENSRNOT00000050655.5	2611	2413.42	58802	240.518	ENSRNOG00000028930.6	Dab2	DAB adaptor protein 2 [Source:RGD Symbol;Acc:621007]
ENSRNOT00000021638.7	1779	1581.42	38528	240.502	ENSRNOG00000016161.7	Lman2	lectin, mannose-binding 2 [Source:RGD Symbol;Acc:1308965]
ENSRNOT00000029829.4	1899	1701.42	41442	240.446	ENSRNOG00000021828.4	Coro1b	coronin 1B [Source:RGD Symbol;Acc:2382]
ENSRNOT00000023477.6	1618	1420.42	34398.7	239.064	ENSRNOG00000017243.6	Bnip3	BCL2 interacting protein 3 [Source:RGD Symbol;Acc:620800]
ENSRNOT00000016137.6	2625	2427.42	58709.7	238.756	ENSRNOG00000010474.7	Hmces	5-hydroxymethylcytosine binding, ES cell specific [Source:RGD Symbol;Acc:1559800]
ENSRNOT00000059127.3	1248	1050.42	25386	238.572	ENSRNOG00000010524.6	Cryab	crystallin, alpha B [Source:RGD Symbol;Acc:2414]
ENSRNOT00000028066.5	2643	2445.42	59011	238.215	ENSRNOG00000020679.6	Icam1	intercellular adhesion molecule 1 [Source:RGD Symbol;Acc:2857]
ENSRNOT00000013919.6	384	196.737	4737.3	237.703	ENSRNOG00000010306.6	H2az1	H2A.Z variant histone 1 [Source:RGD Symbol;Acc:621464]
ENSRNOT00000079916.1	411	221.06	5314.5	237.324	ENSRNOG00000059586.1	AABR07015080.2
ENSRNOT00000088111.1	411	221.06	5314.5	237.324	ENSRNOG00000056747.1	AABR07015055.1
ENSRNOT00000082885.1	411	221.06	5314.5	237.324	ENSRNOG00000060896.1	AABR07063424.1
ENSRNOT00000085875.1	411	221.06	5314.5	237.324	ENSRNOG00000055956.1	AABR07015078.1
ENSRNOT00000072398.1	411	221.06	5314.5	237.324	ENSRNOG00000046600.1	AABR07015066.1
ENSRNOT00000049609.4	994	796.422	19131.9	237.14	ENSRNOG00000032840.4	Sumo4	small ubiquitin-like modifier 4 [Source:RGD Symbol;Acc:1595256]
ENSRNOT00000038340.5	1338	1140.42	27376.3	236.973	ENSRNOG00000027690.5	Eif3el1	eukaryotic translation initiation factor 3, subunit E-like 1 [Source:RGD Symbol;Acc:1311521]
ENSRNOT00000091399.1	1049	851.422	20434.8	236.928	ENSRNOG00000058484.1	Anp32a	acidic nuclear phosphoprotein 32 family member A [Source:RGD Symbol;Acc:11508551]
ENSRNOT00000001794.7	2433	2235.42	53597	236.685	ENSRNOG00000001316.7	Anapc5	anaphase-promoting complex subunit 5 [Source:RGD Symbol;Acc:1306125]
ENSRNOT00000003674.7	454	261.04	6255.31	236.554	ENSRNOG00000002721.7	Ndufb4	NADH:ubiquinone oxidoreductase subunit B4 [Source:RGD Symbol;Acc:1307072]
ENSRNOT00000067974.2	3345	3147.42	75192	235.834	ENSRNOG00000042189.2	Rab31	RAB31, member RAS oncogene family [Source:RGD Symbol;Acc:628598]
ENSRNOT00000083839.1	410	220.128	5245	235.212	ENSRNOG00000059061.1	Uqcr10	ubiquinol-cytochrome c reductase, complex III subunit X [Source:RGD Symbol;Acc:1595126]
ENSRNOT00000048504.5	773	575.47	13700.9	235.026	ENSRNOG00000042094.3	Prr13	proline rich 13 [Source:RGD Symbol;Acc:1307129]
ENSRNOT00000068135.2	2536	2338.42	55623.5	234.815	ENSRNOG00000007492.7	Rpn2	ribophorin II [Source:RGD Symbol;Acc:62075]
ENSRNOT00000067702.2	750	552.492	13124	234.493	ENSRNOG00000042523.2	Ube2d2	ubiquitin-conjugating enzyme E2D 2 [Source:RGD Symbol;Acc:1591897]
ENSRNOT00000083255.1	3785	3587.42	85211	234.478	ENSRNOG00000054257.1	Adam10	ADAM metallopeptidase domain 10 [Source:RGD Symbol;Acc:2032]
ENSRNOT00000001397.4	1958	1760.42	41786.8	234.322	ENSRNOG00000001053.5	Tmed2	transmembrane p24 trafficking protein 2 [Source:RGD Symbol;Acc:69243]
ENSRNOT00000019033.5	639	441.667	10483.5	234.316	ENSRNOG00000038106.2	AABR07026424.1	microtubule-associated protein 1 light chain 3 beta 2 [Source:NCBI gene;Acc:100359928]
ENSRNOT00000003052.6	2146	1948.42	46073	233.428	ENSRNOG00000002225.6	Scarb2	scavenger receptor class B, member 2 [Source:RGD Symbol;Acc:621882]
ENSRNOT00000055583.2	1992	1794.42	42291	232.655	ENSRNOG00000012366.6	Mesd	mesoderm development LRP chaperone [Source:RGD Symbol;Acc:1310344]
ENSRNOT00000051155.3	4386	4188.42	98671.5	232.558	ENSRNOG00000031479.4	Hdlbp	high density lipoprotein binding protein [Source:RGD Symbol;Acc:620962]
ENSRNOT00000009815.5	561	364.419	8582	232.475	ENSRNOG00000007235.5	Atp5mc1	ATP synthase membrane subunit c locus 1 [Source:RGD Symbol;Acc:61933]
ENSRNOT00000037608.4	1170	972.422	22894.1	232.412	ENSRNOG00000021808.4	Tecr	trans-2,3-enoyl-CoA reductase [Source:RGD Symbol;Acc:620376]
ENSRNOT00000022628.5	2148	1950.42	45900	232.313	ENSRNOG00000016807.5	Oat	ornithine aminotransferase [Source:RGD Symbol;Acc:621724]
ENSRNOT00000028484.4	839	641.422	15086	232.177	ENSRNOG00000020979.5	Psmb4	proteasome 20S subunit beta 4 [Source:RGD Symbol;Acc:61877]
ENSRNOT00000012233.5	862	664.422	15607	231.881	ENSRNOG00000009090.5	Dad1	defender against cell death 1 [Source:RGD Symbol;Acc:621028]
ENSRNOT00000066204.3	1531	1333.42	31321	231.877	ENSRNOG00000013741.7	Ube2d3	ubiquitin-conjugating enzyme E2D 3 [Source:RGD Symbol;Acc:619912]
ENSRNOT00000015680.4	1096	898.422	21097	231.809	ENSRNOG00000011631.4	Fst	follistatin [Source:RGD Symbol;Acc:2633]
ENSRNOT00000018169.5	1056	858.422	20141.6	231.623	ENSRNOG00000013545.7	Polr2e	RNA polymerase II subunit E [Source:RGD Symbol;Acc:1589817]
ENSRNOT00000022138.6	1052	854.422	20028.3	231.399	ENSRNOG00000016530.7	Nsa2	NSA2 ribosome biogenesis factor [Source:RGD Symbol;Acc:621335]
ENSRNOT00000091205.1	2257	2059.42	48152.7	230.816	ENSRNOG00000019244.6	Mxra8	matrix remodeling associated 8 [Source:RGD Symbol;Acc:1359356]
ENSRNOT00000009563.2	2376	2178.42	50856	230.457	ENSRNOG00000007152.2	Bhlhe40	basic helix-loop-helix family, member e40 [Source:RGD Symbol;Acc:68439]
ENSRNOT00000025512.4	2991	2793.42	65195	230.392	ENSRNOG00000018836.4	RGD1559896	similar to RIKEN cDNA 2310022B05 [Source:RGD Symbol;Acc:1559896]
ENSRNOT00000025222.6	3953	3755.42	87532.4	230.091	ENSRNOG00000018659.7	Csf1	colony stimulating factor 1 [Source:RGD Symbol;Acc:621063]
ENSRNOT00000065847.3	1043	845.422	19696	229.982	ENSRNOG00000013712.7	Tex261	testis expressed 261 [Source:RGD Symbol;Acc:1305851]
ENSRNOT00000008120.4	1651	1453.42	33810.7	229.642	ENSRNOG00000025481.4	Dctn2	dynactin subunit 2 [Source:RGD Symbol;Acc:1303182]
ENSRNOT00000028887.6	1160	962.422	22290	228.631	ENSRNOG00000021264.6	Pcna	proliferating cell nuclear antigen [Source:RGD Symbol;Acc:3269]
ENSRNOT00000091702.1	4354	4156.42	96243.2	228.581	ENSRNOG00000059801.1	Lima1	LIM domain and actin binding 1 [Source:RGD Symbol;Acc:1564050]
ENSRNOT00000028438.4	532	336.01	7779	228.539	ENSRNOG00000020941.4	Psenen	presenilin enhancer gamma secretase subunit [Source:RGD Symbol;Acc:1312037]
ENSRNOT00000021840.4	8787	8589.42	198019	227.579	ENSRNOG00000014997.4	Igf2r	insulin-like growth factor 2 receptor [Source:RGD Symbol;Acc:2871]
ENSRNOT00000002885.6	656	458.649	10560	227.286	ENSRNOG00000002115.6	Sod1	superoxide dismutase 1 [Source:RGD Symbol;Acc:3731]
ENSRNOT00000018043.8	2067	1869.42	42955	226.828	ENSRNOG00000013443.8	Tm9sf3	transmembrane 9 superfamily member 3 [Source:RGD Symbol;Acc:1564625]
ENSRNOT00000049857.4	1073	875.422	20051.4	226.108	ENSRNOG00000006961.7	Snrpb	small nuclear ribonucleoprotein polypeptides B and B1 [Source:RGD Symbol;Acc:621301]
ENSRNOT00000087625.1	1781	1583.42	36202	225.697	ENSRNOG00000053583.1	Mapk3	mitogen activated protein kinase 3 [Source:RGD Symbol;Acc:3046]
ENSRNOT00000022603.5	1112	914.422	20906	225.691	ENSRNOG00000016770.5	Calm2	calmodulin 2 [Source:RGD Symbol;Acc:2258]
ENSRNOT00000067780.3	1783	1585.42	36245	225.68	ENSRNOG00000042838.3	Junb	JunB proto-oncogene, AP-1 transcription factor subunit [Source:RGD Symbol;Acc:2944]
ENSRNOT00000025906.4	1735	1537.42	35120.3	225.504	ENSRNOG00000018993.4	Ilk	integrin-linked kinase [Source:RGD Symbol;Acc:620063]
ENSRNOT00000089016.1	2411	2213.42	50433.3	224.928	ENSRNOG00000059463.1	Slc39a1	solute carrier family 39 member 1 [Source:RGD Symbol;Acc:1305241]
ENSRNOT00000027123.6	1007	809.422	18427.9	224.746	ENSRNOG00000019940.6	Ssr2	signal sequence receptor subunit 2 [Source:RGD Symbol;Acc:1308365]
ENSRNOT00000088821.1	1308	1110.42	25266.1	224.616	ENSRNOG00000001709.7	Ap2m1	adaptor related protein complex 2 subunit mu 1 [Source:RGD Symbol;Acc:620135]
ENSRNOT00000079414.1	1623	1425.42	32413.6	224.478	ENSRNOG00000008283.7	B4galt5	beta-1,4-galactosyltransferase 5 [Source:RGD Symbol;Acc:1310062]
ENSRNOT00000066014.3	719	521.514	11854.5	224.392	ENSRNOG00000004883.7	Erh	ERH, mRNA splicing and mitosis factor [Source:RGD Symbol;Acc:1595409]
ENSRNOT00000004228.5	1148	950.422	21561	223.945	ENSRNOG00000003163.5	Sdhc	succinate dehydrogenase complex subunit C [Source:RGD Symbol;Acc:1359454]
ENSRNOT00000073834.2	874	676.422	15338	223.842	ENSRNOG00000049920.2	Psma2	proteasome 20S subunit alpha 2 [Source:RGD Symbol;Acc:61842]
ENSRNOT00000025782.6	3036	2838.42	64128	223.029	ENSRNOG00000018761.6	Eif3c	eukaryotic translation initiation factor 3, subunit C [Source:RGD Symbol;Acc:1308871]
ENSRNOT00000022047.5	1116	918.422	20729	222.805	ENSRNOG00000016133.5	Sumo1	small ubiquitin-like modifier 1 [Source:RGD Symbol;Acc:1306919]
ENSRNOT00000017555.5	1705	1507.42	33981	222.531	ENSRNOG00000013023.5	Nop53	NOP53 ribosome biogenesis factor [Source:RGD Symbol;Acc:1303085]
ENSRNOT00000021391.6	1704	1506.42	33919	222.273	ENSRNOG00000015914.7	U2af2	U2 small nuclear RNA auxiliary factor 2 [Source:RGD Symbol;Acc:1310690]
ENSRNOT00000002996.5	1347	1149.42	25854	222.043	ENSRNOG00000002205.6	Ociad1	OCIA domain containing 1 [Source:RGD Symbol;Acc:1359549]
ENSRNOT00000000120.3	1182	984.422	22091	221.525	ENSRNOG00000000108.3	Aga	aspartylglucosaminidase [Source:RGD Symbol;Acc:1309646]
ENSRNOT00000004950.6	738	540.503	12086.4	220.743	ENSRNOG00000003720.6	Prrx1	paired related homeobox 1 [Source:RGD Symbol;Acc:628884]
ENSRNOT00000081761.2	429	237.68	5302.28	220.222	ENSRNOG00000052226.2	LOC108348144	NADH dehydrogenase [ubiquinone] 1 alpha subcomplex subunit 1 [Source:RGD Symbol;Acc:11430296]
ENSRNOT00000024406.6	477	282.85	6304.77	220.041	ENSRNOG00000017907.6	Ube2i	ubiquitin-conjugating enzyme E2I [Source:RGD Symbol;Acc:3926]
ENSRNOT00000012826.4	1693	1495.42	33295	219.788	ENSRNOG00000009243.4	Oaf	out at first homolog [Source:RGD Symbol;Acc:1305890]
ENSRNOT00000045083.4	943	745.422	16579	219.556	ENSRNOG00000031851.5	Ndufa4l2	NDUFA4, mitochondrial complex associated like 2 [Source:RGD Symbol;Acc:2324558]
ENSRNOT00000067141.2	853	655.422	14574.2	219.509	ENSRNOG00000017905.8	Map1lc3b	microtubule-associated protein 1 light chain 3 beta [Source:RGD Symbol;Acc:621315]
ENSRNOT00000001310.7	1237	1039.42	23086.3	219.256	ENSRNOG00000000990.7	Pdap1	PDGFA associated protein 1 [Source:RGD Symbol;Acc:620442]
ENSRNOT00000083750.1	1512	1314.42	29157	218.977	ENSRNOG00000055257.1	Selenof	selenoprotein F [Source:RGD Symbol;Acc:621291]
ENSRNOT00000026197.6	1382	1184.42	26252	218.799	ENSRNOG00000019277.8	Vdac3	voltage-dependent anion channel 3 [Source:RGD Symbol;Acc:621577]
ENSRNOT00000016885.5	831	633.422	14034	218.715	ENSRNOG00000012582.5	Eif4ebp1	eukaryotic translation initiation factor 4E binding protein 1 [Source:RGD Symbol;Acc:620259]
ENSRNOT00000025824.6	2128	1930.42	42493.2	217.298	ENSRNOG00000019090.6	Cct3	chaperonin containing TCP1 subunit 3 [Source:RGD Symbol;Acc:735038]
ENSRNOT00000005155.3	1728	1530.42	33666.1	217.156	ENSRNOG00000003869.3	Sod3	superoxide dismutase 3 [Source:RGD Symbol;Acc:3733]
ENSRNOT00000075517.3	644	446.667	9816.92	216.961	ENSRNOG00000050410.3	Snrpd3	small nuclear ribonucleoprotein D3 polypeptide [Source:RGD Symbol;Acc:1597573]
ENSRNOT00000009431.6	5151	4953.42	108802	216.83	ENSRNOG00000006992.6	Rpl7	ribosomal protein L7 [Source:RGD Symbol;Acc:735169]
ENSRNOT00000014464.7	2625	2427.42	53152	216.154	ENSRNOG00000010668.7	Anxa6	annexin A6 [Source:RGD Symbol;Acc:621172]
ENSRNOT00000001679.7	3078	2880.42	63059.5	216.115	ENSRNOG00000001249.8	Col6a1	collagen type VI alpha 1 chain [Source:RGD Symbol;Acc:1565398]
ENSRNOT00000021689.5	3678	3480.42	76105	215.859	ENSRNOG00000015845.5	Niban2	niban apoptosis regulator 2 [Source:RGD Symbol;Acc:1307018]
ENSRNOT00000002579.5	1052	854.422	18673.6	215.748	ENSRNOG00000001884.5	Ranbp1	RAN binding protein 1 [Source:RGD Symbol;Acc:1310521]
ENSRNOT00000010429.2	1057	859.422	18770	215.599	ENSRNOG00000007806.2	Arf5	ADP-ribosylation factor 5 [Source:RGD Symbol;Acc:621278]
ENSRNOT00000003691.3	2319	2121.42	46331	215.593	ENSRNOG00000002643.3	Ugdh	UDP-glucose 6-dehydrogenase [Source:RGD Symbol;Acc:621879]
ENSRNOT00000072464.2	404	214.61	4686	215.547	ENSRNOG00000045555.2	LOC100910944	reactive oxygen species modulator 1-like [Source:RGD Symbol;Acc:6496011]
ENSRNOT00000074211.1	729	531.514	11556	214.626	ENSRNOG00000048194.1	LOC100912380	calpain small subunit 1-like [Source:RGD Symbol;Acc:6487412]
ENSRNOT00000072756.1	729	531.514	11556	214.626	ENSRNOG00000045747.1	Capns1	calpain, small subunit 1 [Source:RGD Symbol;Acc:2270]
ENSRNOT00000064802.3	1084	886.422	19262	214.512	ENSRNOG00000019223.8	Atp5f1c	ATP synthase F1 subunit gamma [Source:RGD Symbol;Acc:620011]
ENSRNOT00000067739.2	1901	1703.42	36935	214.045	ENSRNOG00000000248.6	Srsf2	serine and arginine rich splicing factor 2 [Source:RGD Symbol;Acc:1359422]
ENSRNOT00000034740.4	1017	819.422	17748.9	213.823	ENSRNOG00000024186.4	Eef1b2	eukaryotic translation elongation factor 1 beta 2 [Source:RGD Symbol;Acc:1311415]
ENSRNOT00000005522.7	3499	3301.42	71470.9	213.707	ENSRNOG00000004132.7	Lasp1	LIM and SH3 protein 1 [Source:RGD Symbol;Acc:68408]
ENSRNOT00000024711.5	924	726.422	15715.9	213.57	ENSRNOG00000018289.6	Park7	Parkinsonism associated deglycase [Source:RGD Symbol;Acc:621808]
ENSRNOT00000009497.5	3747	3549.42	76587	213.004	ENSRNOG00000007177.5	Poglut3	protein O-glucosyltransferase 3 [Source:RGD Symbol;Acc:1562027]
ENSRNOT00000046943.2	1660	1462.42	31369	211.747	ENSRNOG00000017118.6	P4ha3	prolyl 4-hydroxylase subunit alpha 3 [Source:RGD Symbol;Acc:735150]
ENSRNOT00000021803.7	741	543.503	11653	211.653	ENSRNOG00000016269.7	Rpl7l1	ribosomal protein L7-like 1 [Source:RGD Symbol;Acc:1308469]
ENSRNOT00000024156.5	1614	1416.42	30344	211.48	ENSRNOG00000017854.5	Ucp2	uncoupling protein 2 [Source:RGD Symbol;Acc:3932]
ENSRNOT00000011316.6	324	145.667	3117	211.235	ENSRNOG00000008461.6	Smdt1	single-pass membrane protein with aspartate-rich tail 1 [Source:RGD Symbol;Acc:1311310]
ENSRNOT00000060514.3	1279	1081.42	23112.1	210.977	ENSRNOG00000011621.7	Hnrnpc	heterogeneous nuclear ribonucleoprotein C [Source:RGD Symbol;Acc:1309982]
ENSRNOT00000048848.3	1283	1085.42	23171.3	210.738	ENSRNOG00000003076.7	Rbms2	RNA binding motif, single stranded interacting protein 2 [Source:RGD Symbol;Acc:1304813]
ENSRNOT00000031164.3	2418	2220.42	47316.7	210.363	ENSRNOG00000028629.3	Akt1	AKT serine/threonine kinase 1 [Source:RGD Symbol;Acc:2081]
ENSRNOT00000002037.6	1068	870.422	18545	210.323	ENSRNOG00000001488.6	Psmb1	proteasome 20S subunit beta 1 [Source:RGD Symbol;Acc:621092]
ENSRNOT00000085466.1	3453	3255.42	69318	210.198	ENSRNOG00000060350.1	Iqsec1	IQ motif and Sec7 domain ArfGEF 1 [Source:RGD Symbol;Acc:1596313]
ENSRNOT00000018009.6	1975	1777.42	37831	210.11	ENSRNOG00000013360.6	Prkcsh	protein kinase C substrate 80K-H [Source:RGD Symbol;Acc:1309628]
ENSRNOT00000027944.6	1550	1352.42	28766	209.97	ENSRNOG00000020583.7	Fcgrt	Fc fragment of IgG receptor and transporter [Source:RGD Symbol;Acc:61811]
ENSRNOT00000080424.1	381	194.139	4122	209.597	ENSRNOG00000058289.1	AABR07027575.1
ENSRNOT00000083682.1	1336	1138.42	24165.8	209.55	ENSRNOG00000012436.6	Adh6	alcohol dehydrogenase 6 (class V) [Source:RGD Symbol;Acc:1306313]
ENSRNOT00000039002.3	4635	4437.42	94101	209.34	ENSRNOG00000006305.5	Slc38a2	solute carrier family 38, member 2 [Source:RGD Symbol;Acc:69420]
ENSRNOT00000000783.4	1187	989.422	20889.9	208.423	ENSRNOG00000000632.6	Cdk1	cyclin-dependent kinase 1 [Source:RGD Symbol;Acc:2319]
ENSRNOT00000019126.5	4954	4756.42	100295	208.156	ENSRNOG00000013516.6	Sf3b1	splicing factor 3b, subunit 1 [Source:RGD Symbol;Acc:620148]
ENSRNOT00000091050.1	1203	1005.42	21174.5	207.9	ENSRNOG00000055579.1	Tmbim6	transmembrane BAX inhibitor motif containing 6 [Source:RGD Symbol;Acc:3842]
ENSRNOT00000022921.6	1416	1218.42	25642	207.751	ENSRNOG00000017078.6	Selenon	selenoprotein N [Source:RGD Symbol;Acc:1304574]
ENSRNOT00000016981.6	2691	2493.42	52425	207.555	ENSRNOG00000010945.6	Ywhab	tyrosine 3-monooxygenase/tryptophan 5-monooxygenase activation protein, beta [Source:RGD Symbol;Acc:61998]
ENSRNOT00000039729.4	1501	1303.42	27395.5	207.484	ENSRNOG00000023850.4	Tbrg1	transforming growth factor beta regulator 1 [Source:RGD Symbol;Acc:1305123]
ENSRNOT00000000256.4	850	652.422	13704	207.352	ENSRNOG00000000239.4	Ccl7	C-C motif chemokine ligand 7 [Source:RGD Symbol;Acc:1359152]
ENSRNOT00000022029.6	2559	2361.42	49479.2	206.842	ENSRNOG00000015941.8	Fkbp10	FKBP prolyl isomerase 10 [Source:RGD Symbol;Acc:1549751]
ENSRNOT00000022196.5	685	487.554	10210	206.725	ENSRNOG00000016272.5	Edf1	endothelial differentiation-related factor 1 [Source:RGD Symbol;Acc:1308073]
ENSRNOT00000028695.5	572	375.286	7854	206.594	ENSRNOG00000021132.5	Trmt112	tRNA methyltransferase subunit 11-2 [Source:RGD Symbol;Acc:1309710]
ENSRNOT00000043005.2	466	272.41	5688.88	206.155	ENSRNOG00000031579.2	LOC100363469	ribosomal protein S24-like [Source:RGD Symbol;Acc:2322976]
ENSRNOT00000033907.5	465	271.453	5655.84	205.68	ENSRNOG00000000490.7	Rps10	ribosomal protein S10 [Source:RGD Symbol;Acc:621024]
ENSRNOT00000006209.5	3556	3358.42	69955	205.624	ENSRNOG00000004420.5	Rad21	RAD21 cohesin complex component [Source:RGD Symbol;Acc:1594529]
ENSRNOT00000005987.3	6069	5871.42	122212	205.476	ENSRNOG00000004291.6	Cltc	clathrin heavy chain [Source:RGD Symbol;Acc:2364]
ENSRNOT00000019192.6	1566	1368.42	28457	205.286	ENSRNOG00000014117.7	Hmox1	heme oxygenase 1 [Source:RGD Symbol;Acc:2806]
ENSRNOT00000045753.2	1825	1627.42	33682	204.309	ENSRNOG00000039666.3	Srpx	sushi-repeat-containing protein, X-linked [Source:RGD Symbol;Acc:70950]
ENSRNOT00000028176.6	1679	1481.42	30593.7	203.865	ENSRNOG00000020763.8	Snrnp70	small nuclear ribonucleoprotein U1 subunit 70 [Source:RGD Symbol;Acc:1307120]
ENSRNOT00000065633.3	3198	3000.42	61877.8	203.583	ENSRNOG00000003256.7	Ccng1	cyclin G1 [Source:RGD Symbol;Acc:2295]
ENSRNOT00000084836.1	291	119.195	2456	203.404	ENSRNOG00000059270.1	AC119015.4
ENSRNOT00000079552.1	645	447.667	9216	203.225	ENSRNOG00000060448.1	Hand2	heart and neural crest derivatives expressed 2 [Source:RGD Symbol;Acc:621207]
ENSRNOT00000073247.2	873	675.422	13836	202.22	ENSRNOG00000048812.2	Gpx1	glutathione peroxidase 1 [Source:RGD Symbol;Acc:2729]
ENSRNOT00000081914.1	2203	2005.42	41077	202.201	ENSRNOG00000054352.1	Atp6ap1	ATPase H+ transporting accessory protein 1 [Source:RGD Symbol;Acc:620423]
ENSRNOT00000025794.4	2063	1865.42	38194	202.119	ENSRNOG00000019048.4	Sod2	superoxide dismutase 2 [Source:RGD Symbol;Acc:3732]
ENSRNOT00000042411.5	1720	1522.42	31120	201.787	ENSRNOG00000008452.7	Eid1	EP300 interacting inhibitor of differentiation 1 [Source:RGD Symbol;Acc:1562702]
ENSRNOT00000009666.6	960	762.422	15574	201.648	ENSRNOG00000007114.6	Psma6	proteasome 20S subunit alpha 6 [Source:RGD Symbol;Acc:61849]
ENSRNOT00000008325.2	546	349.749	7135	201.385	ENSRNOG00000005698.2	Ndufa5	NADH:ubiquinone oxidoreductase subunit A5 [Source:RGD Symbol;Acc:3155]
ENSRNOT00000010433.7	2949	2751.42	56112	201.321	ENSRNOG00000007763.7	Plod1	procollagen-lysine, 2-oxoglutarate 5-dioxygenase 1 [Source:RGD Symbol;Acc:621382]
ENSRNOT00000087540.1	1837	1639.42	33351	200.82	ENSRNOG00000057934.1	Tmx1	thioredoxin-related transmembrane protein 1 [Source:RGD Symbol;Acc:1308455]
ENSRNOT00000090977.1	698	500.535	10168.1	200.538	ENSRNOG00000050473.2	Rps27l	ribosomal protein S27-like [Source:RGD Symbol;Acc:1595396]
ENSRNOT00000011272.7	477	282.85	5723.17	199.742	ENSRNOG00000008512.7	Btf3l4	basic transcription factor 3-like 4 [Source:RGD Symbol;Acc:1311774]
ENSRNOT00000027273.7	3662	3464.42	70047	199.594	ENSRNOG00000020129.7	Cdh3	cadherin 3 [Source:RGD Symbol;Acc:621089]
ENSRNOT00000009233.6	2420	2222.42	44897.4	199.427	ENSRNOG00000006859.6	Insig1	insulin induced gene 1 [Source:RGD Symbol;Acc:708457]
ENSRNOT00000075790.2	372	186.213	3759	199.275	ENSRNOG00000046172.2	Sf3b6	splicing factor 3B, subunit 6 [Source:RGD Symbol;Acc:2318878]
ENSRNOT00000051749.2	721	523.514	10563	199.181	ENSRNOG00000021151.4	Ppp1r14b	protein phosphatase 1, regulatory (inhibitor) subunit 14B [Source:RGD Symbol;Acc:628702]
ENSRNOT00000055137.2	5566	5368.42	108202	198.965	ENSRNOG00000006548.6	Mrc2	mannose receptor, C type 2 [Source:RGD Symbol;Acc:1559436]
ENSRNOT00000026651.5	1065	867.422	17479	198.919	ENSRNOG00000019666.7	Ubxn1	UBX domain protein 1 [Source:RGD Symbol;Acc:1309471]
ENSRNOT00000013747.4	1788	1590.42	32036	198.845	ENSRNOG00000010252.4	Hexa	hexosaminidase subunit alpha [Source:RGD Symbol;Acc:2792]
ENSRNOT00000064851.3	3282	3084.42	61813	197.832	ENSRNOG00000007518.7	Nckap1	NCK-associated protein 1 [Source:RGD Symbol;Acc:61939]
ENSRNOT00000063821.3	3440	3242.42	64967.7	197.796	ENSRNOG00000029212.6	Vcan	versican [Source:RGD Symbol;Acc:619940]
ENSRNOT00000077756.1	1651	1453.42	29119	197.776	ENSRNOG00000058359.1	Fkbp8	FKBP prolyl isomerase 8 [Source:RGD Symbol;Acc:1308670]
ENSRNOT00000080434.1	2202	2004.42	40108	197.529	ENSRNOG00000060723.1	AABR07071244.1
ENSRNOT00000012854.6	2010	1812.42	36265.8	197.527	ENSRNOG00000009568.6	Hdac1	histone deacetylase 1 [Source:RGD Symbol;Acc:1309799]
ENSRNOT00000027494.7	2074	1876.42	37497.4	197.27	ENSRNOG00000020235.8	Hnrnpl	heterogeneous nuclear ribonucleoprotein L [Source:RGD Symbol;Acc:71059]
ENSRNOT00000064744.1	1164	966.422	19301.2	197.154	ENSRNOG00000004616.8	Npm1	nucleophosmin 1 [Source:RGD Symbol;Acc:3192]
ENSRNOT00000006906.3	443	250.709	4999.31	196.847	ENSRNOG00000005203.3	Sec61g	Sec61 translocon gamma subunit [Source:RGD Symbol;Acc:1596170]
ENSRNOT00000079380.1	1307	1109.42	22113	196.761	ENSRNOG00000051720.1	Nudc	nuclear distribution C, dynein complex regulator [Source:RGD Symbol;Acc:3215]
ENSRNOT00000042314.3	1601	1403.42	27944.2	196.559	ENSRNOG00000033426.4	Cdc37	cell division cycle 37 [Source:RGD Symbol;Acc:71006]
ENSRNOT00000047669.5	3041	2843.42	56518.8	196.219	ENSRNOG00000050994.3	Cttn	cortactin [Source:RGD Symbol;Acc:619839]
ENSRNOT00000091551.1	1173	975.422	19368.9	196.02	ENSRNOG00000054286.1	Rrm2	ribonucleotide reductase regulatory subunit M2 [Source:RGD Symbol;Acc:1598310]
ENSRNOT00000027150.3	1072	874.422	17340.3	195.76	ENSRNOG00000020016.3	Lamtor1	late endosomal/lysosomal adaptor, MAPK and MTOR activator 1 [Source:RGD Symbol;Acc:735078]
ENSRNOT00000018462.6	1700	1502.42	29768.3	195.592	ENSRNOG00000013505.6	Vdac2	voltage-dependent anion channel 2 [Source:RGD Symbol;Acc:621576]
ENSRNOT00000003412.3	2238	2040.42	40391	195.413	ENSRNOG00000002520.5	Litaf	lipopolysaccharide-induced TNF factor [Source:RGD Symbol;Acc:69294]
ENSRNOT00000063967.3	2465	2267.42	44875	195.372	ENSRNOG00000006545.8	Septin7	septin 7 [Source:RGD Symbol;Acc:620469]
ENSRNOT00000005014.4	907	709.422	14034	195.284	ENSRNOG00000003763.7	Prdx4	peroxiredoxin 4 [Source:RGD Symbol;Acc:620043]
ENSRNOT00000080502.1	1189	991.422	19593.7	195.096	ENSRNOG00000018159.7	Anxa4	annexin A4 [Source:RGD Symbol;Acc:621171]
ENSRNOT00000080663.1	2728	2530.42	49951	194.868	ENSRNOG00000055860.1	Arl8b	ADP-ribosylation factor like GTPase 8B [Source:RGD Symbol;Acc:1562830]
ENSRNOT00000049895.3	2684	2486.42	49039	194.696	ENSRNOG00000025570.5	Os9	OS9, endoplasmic reticulum lectin [Source:RGD Symbol;Acc:1359574]
ENSRNOT00000026249.5	1210	1012.42	19947.8	194.501	ENSRNOG00000019326.5	Cfdp1	craniofacial development protein 1 [Source:RGD Symbol;Acc:735080]
ENSRNOT00000063942.1	1964	1766.42	34774.8	194.339	ENSRNOG00000002101.6	Paics	phosphoribosylaminoimidazole carboxylase and phosphoribosylaminoimidazolesuccinocarboxamide synthase [Source:RGD Symbol;Acc:620066]
ENSRNOT00000016450.6	1535	1337.42	26176	193.208	ENSRNOG00000012026.6	Psmc2	proteasome 26S subunit, ATPase 2 [Source:RGD Symbol;Acc:3428]
ENSRNOT00000047790.2	702	504.524	9872.25	193.163	ENSRNOG00000007866.8	Clec2dl1	C-type lectin domain family 2 member D-like 1 [Source:RGD Symbol;Acc:1588698]
ENSRNOT00000070862.2	577	380.225	7438	193.11	ENSRNOG00000048320.2	Ndufa11	NADH:ubiquinone oxidoreductase subunit A11 [Source:RGD Symbol;Acc:1303292]
ENSRNOT00000016509.6	560	363.448	7108	193.061	ENSRNOG00000012383.6	Ndufc2	NADH:ubiquinone oxidoreductase subunit C2 [Source:RGD Symbol;Acc:1307511]
ENSRNOT00000081980.1	2850	2652.42	51815.7	192.845	ENSRNOG00000053450.1	Myadm	myeloid-associated differentiation marker [Source:RGD Symbol;Acc:727835]
ENSRNOT00000019624.5	683	485.564	9485	192.833	ENSRNOG00000014568.5	Ndufb10	NADH:ubiquinone oxidoreductase subunit B10 [Source:RGD Symbol;Acc:1310782]
ENSRNOT00000024609.6	1085	887.422	17332	192.8	ENSRNOG00000018281.6	Uqcrfs1	ubiquinol-cytochrome c reductase, Rieske iron-sulfur polypeptide 1 [Source:RGD Symbol;Acc:628838]
ENSRNOT00000026445.6	1625	1427.42	27878	192.796	ENSRNOG00000019532.6	Emc10	ER membrane protein complex subunit 10 [Source:RGD Symbol;Acc:1303214]
ENSRNOT00000019501.4	1984	1786.42	34883	192.761	ENSRNOG00000014350.4	Ccn1	cellular communication network factor 1 [Source:RGD Symbol;Acc:620763]
ENSRNOT00000000352.5	1846	1648.42	32160	192.592	ENSRNOG00000000321.5	Cd24	CD24 molecule [Source:RGD Symbol;Acc:2298]
ENSRNOT00000000211.5	3785	3587.42	69966.5	192.53	ENSRNOG00000046414.2	Vwa5a	von Willebrand factor A domain containing 5A [Source:RGD Symbol;Acc:735145]
ENSRNOT00000013271.6	2420	2222.42	43311.7	192.384	ENSRNOG00000009184.7	Foxp1	forkhead box P1 [Source:RGD Symbol;Acc:1308669]
ENSRNOT00000005368.7	1638	1440.42	28054.3	192.265	ENSRNOG00000003846.7	Pitpna	phosphatidylinositol transfer protein, alpha [Source:RGD Symbol;Acc:61885]
ENSRNOT00000015019.6	2188	1990.42	38764	192.253	ENSRNOG00000011282.6	Ppp2r1a	protein phosphatase 2 scaffold subunit A alpha [Source:RGD Symbol;Acc:620907]
ENSRNOT00000085735.1	1687	1489.42	28998.9	192.2	ENSRNOG00000055471.1	Ywhah	tyrosine 3-monooxygenase/tryptophan 5-monooxygenase activation protein, eta [Source:RGD Symbol;Acc:3978]
ENSRNOT00000076021.1	389	201.201	3914	192.035	ENSRNOG00000000996.7	Arpc1a	actin related protein 2/3 complex, subunit 1A [Source:RGD Symbol;Acc:620834]
ENSRNOT00000019039.7	705	507.524	9866	191.899	ENSRNOG00000014078.7	Ndufb8	NADH:ubiquinone oxidoreductase subunit B8 [Source:RGD Symbol;Acc:1309129]
ENSRNOT00000087532.1	156	31.9215	620	191.734	ENSRNOG00000061301.1	AC096239.3
ENSRNOT00000011665.4	558	361.506	7019	191.668	ENSRNOG00000008689.8	Cbx1	chromobox 1 [Source:RGD Symbol;Acc:1310714]
ENSRNOT00000075493.2	723	525.514	10192	191.454	ENSRNOG00000049075.2	Fabp5	fatty acid binding protein 5 [Source:RGD Symbol;Acc:70997]
ENSRNOT00000091577.1	3569	3371.42	64980.9	190.266	ENSRNOG00000002182.7	Septin11	septin 11 [Source:RGD Symbol;Acc:1307405]
ENSRNOT00000090085.1	968	770.422	14828.2	189.999	ENSRNOG00000053557.1	LOC102553386	SUMO-conjugating enzyme UBC9-like [Source:RGD Symbol;Acc:7518044]
ENSRNOT00000022231.6	3261	3063.42	58936	189.917	ENSRNOG00000016316.6	Mcm2	minichromosome maintenance complex component 2 [Source:RGD Symbol;Acc:1305577]
ENSRNOT00000020443.6	1040	842.422	16188.2	189.696	ENSRNOG00000014846.6	Anp32a	acidic nuclear phosphoprotein 32 family member A [Source:RGD Symbol;Acc:11508551]
ENSRNOT00000033687.1	579	382.187	7341	189.613	ENSRNOG00000027722.1	H1f10	H1.10 linker histone [Source:RGD Symbol;Acc:1565596]
ENSRNOT00000064849.3	1831	1633.42	31352.4	189.479	ENSRNOG00000008283.7	B4galt5	beta-1,4-galactosyltransferase 5 [Source:RGD Symbol;Acc:1310062]
ENSRNOT00000021071.6	1838	1640.42	31404	188.981	ENSRNOG00000014637.6	Atxn10	ataxin 10 [Source:RGD Symbol;Acc:621813]
ENSRNOT00000073688.2	570	373.316	7142	188.857	ENSRNOG00000048342.2	Tbca	tubulin folding cofactor A [Source:RGD Symbol;Acc:1311538]
ENSRNOT00000067203.3	1904	1706.42	32599	188.585	ENSRNOG00000008593.7	Ryk	receptor-like tyrosine kinase [Source:RGD Symbol;Acc:620549]
ENSRNOT00000023554.6	3220	3022.42	57604	188.143	ENSRNOG00000016552.6	Hmgcs1	3-hydroxy-3-methylglutaryl-CoA synthase 1 [Source:RGD Symbol;Acc:70970]
ENSRNOT00000077687.1	1098	900.422	17150	188.021	ENSRNOG00000036852.3	Pcbp2	poly(rC) binding protein 2 [Source:RGD Symbol;Acc:1309626]
ENSRNOT00000017686.7	1463	1265.42	24037	187.514	ENSRNOG00000012966.7	Acadl	acyl-CoA dehydrogenase, long chain [Source:RGD Symbol;Acc:2011]
ENSRNOT00000021372.6	567	370.361	7016	187.006	ENSRNOG00000015953.6	Oaz2	ornithine decarboxylase antizyme 2 [Source:RGD Symbol;Acc:1562933]
ENSRNOT00000008969.6	1845	1647.42	31132	186.549	ENSRNOG00000006766.6	Laptm4b	lysosomal protein transmembrane 4 beta [Source:RGD Symbol;Acc:1311853]
ENSRNOT00000074446.2	756	558.481	10551.9	186.515	ENSRNOG00000050563.2	Sub1	SUB1 regulator of transcription [Source:RGD Symbol;Acc:621582]
ENSRNOT00000065464.2	1235	1037.42	19581	186.324	ENSRNOG00000004526.7	Cox7a2l	cytochrome c oxidase subunit 7A2 like [Source:RGD Symbol;Acc:1306111]
ENSRNOT00000024012.6	2895	2697.42	50695	185.526	ENSRNOG00000028498.5	Wdr1	WD repeat domain 1 [Source:RGD Symbol;Acc:1305789]
ENSRNOT00000012101.6	1294	1096.42	20601	185.481	ENSRNOG00000009080.6	Atp6v1d	ATPase H+ transporting V1 subunit D [Source:RGD Symbol;Acc:735119]
ENSRNOT00000046126.3	2142	1944.42	36504	185.327	ENSRNOG00000019456.6	Kars	lysyl-tRNA synthetase [Source:RGD Symbol;Acc:1359653]
ENSRNOT00000086893.1	2805	2607.42	48939.9	185.285	ENSRNOG00000019799.7	Pcdhgc3	protocadherin gamma subfamily C, 3 [Source:RGD Symbol;Acc:620746]
ENSRNOT00000013852.4	1603	1405.42	26306	184.773	ENSRNOG00000032436.2	Tmod3	tropomodulin 3 [Source:RGD Symbol;Acc:1311030]
ENSRNOT00000010602.7	1423	1225.42	22802	183.686	ENSRNOG00000007842.7	Aup1	AUP1, lipid droplet regulating VLDL assembly factor [Source:RGD Symbol;Acc:1591777]
ENSRNOT00000009737.3	643	445.667	8276.99	183.337	ENSRNOG00000007392.3	Atp6v1f	ATPase H+ transporting V1 subunit F [Source:RGD Symbol;Acc:621552]
ENSRNOT00000011999.5	1423	1225.42	22701	182.873	ENSRNOG00000009068.5	Phlda3	pleckstrin homology-like domain, family A, member 3 [Source:RGD Symbol;Acc:1310502]
ENSRNOT00000004320.3	2198	2000.42	37023	182.7	ENSRNOG00000003217.3	Lgals3bp	galectin 3 binding protein [Source:RGD Symbol;Acc:620837]
ENSRNOT00000006725.5	3538	3340.42	61772.6	182.551	ENSRNOG00000005067.5	Zfp36l2	zinc finger protein 36, C3H type-like 2 [Source:RGD Symbol;Acc:1308913]
ENSRNOT00000027537.6	1174	976.422	18026	182.243	ENSRNOG00000020308.6	Ech1	enoyl-CoA hydratase 1 [Source:RGD Symbol;Acc:69353]
ENSRNOT00000081574.1	1314	1116.42	20607.4	182.215	ENSRNOG00000006545.8	Septin7	septin 7 [Source:RGD Symbol;Acc:620469]
ENSRNOT00000008972.6	3166	2968.42	54770.7	182.143	ENSRNOG00000006197.7	Calu	calumenin [Source:RGD Symbol;Acc:620383]
ENSRNOT00000019386.3	2488	2290.42	42254.4	182.115	ENSRNOG00000014297.3	Sdc4	syndecan 4 [Source:RGD Symbol;Acc:3650]
ENSRNOT00000042928.3	1378	1180.42	21774	182.092	ENSRNOG00000029707.3	Mt-nd4	mitochondrially encoded NADH dehydrogenase 4 [Source:RGD Symbol;Acc:620559]
ENSRNOT00000090451.1	2303	2105.42	38831	182.066	ENSRNOG00000056207.1	Capza2	capping actin protein of muscle Z-line subunit alpha 2 [Source:RGD Symbol;Acc:1549770]
ENSRNOT00000080860.1	4183	3985.42	73471.3	181.984	ENSRNOG00000019143.7	Galnt2	polypeptide N-acetylgalactosaminyltransferase 2 [Source:RGD Symbol;Acc:1310692]
ENSRNOT00000066371.3	863	665.422	12260.4	181.885	ENSRNOG00000015437.7	Tmem14c	transmembrane protein 14C [Source:RGD Symbol;Acc:621692]
ENSRNOT00000007567.4	785	587.458	10816	181.751	ENSRNOG00000005512.4	Ndufa4	NDUFA4, mitochondrial complex associated [Source:RGD Symbol;Acc:1584719]
ENSRNOT00000064916.2	770	572.47	10511.1	181.254	ENSRNOG00000019895.6	Nedd8	NEDD8 ubiquitin like modifier [Source:RGD Symbol;Acc:3158]
ENSRNOT00000003077.5	6514	6316.42	115568	180.616	ENSRNOG00000002244.5	Pdgfra	platelet derived growth factor receptor alpha [Source:RGD Symbol;Acc:3284]
ENSRNOT00000072494.2	660	462.649	8460	180.513	ENSRNOG00000049931.2	LOC288913	similar to LEYDIG CELL TUMOR 10 KD PROTEIN [Source:RGD Symbol;Acc:735128]
ENSRNOT00000013331.6	1325	1127.42	20597	180.346	ENSRNOG00000009811.6	Cnih1	cornichon family AMPA receptor auxiliary protein 1 [Source:RGD Symbol;Acc:1312030]
ENSRNOT00000004895.3	998	800.422	14611	180.198	ENSRNOG00000003549.3	Cnpy2	canopy FGF signaling regulator 2 [Source:RGD Symbol;Acc:1589072]
ENSRNOT00000014065.7	2575	2377.42	43386.7	180.152	ENSRNOG00000010584.7	Tmem123	transmembrane protein 123 [Source:RGD Symbol;Acc:1305625]
ENSRNOT00000010593.7	980	782.422	14277	180.13	ENSRNOG00000007967.7	Sdhb	succinate dehydrogenase complex iron sulfur subunit B [Source:RGD Symbol;Acc:1308598]
ENSRNOT00000018796.4	1827	1629.42	29713	180.012	ENSRNOG00000014051.4	Pgrmc2	progesterone receptor membrane component 2 [Source:RGD Symbol;Acc:1308804]
ENSRNOT00000089205.1	294	121.541	2215	179.904	ENSRNOG00000060069.1	AABR07059891.1
ENSRNOT00000082687.1	3503	3305.42	60217	179.838	ENSRNOG00000061108.1	Arcn1	archain 1 [Source:RGD Symbol;Acc:1359110]
ENSRNOT00000002358.6	2946	2748.42	49973	179.491	ENSRNOG00000001719.6	Psmd2	proteasome 26S subunit, non-ATPase 2 [Source:RGD Symbol;Acc:1305752]
ENSRNOT00000044841.6	579	382.187	6938	179.204	ENSRNOG00000059116.1	AABR07035818.1
ENSRNOT00000079875.1	1055	857.422	15553.8	179.073	ENSRNOG00000052506.1	Ak3	adenylate kinase 3 [Source:RGD Symbol;Acc:619885]
ENSRNOT00000071603.2	1749	1551.42	28130.2	178.992	ENSRNOG00000047158.2	Selenbp1	selenium binding protein 1 [Source:RGD Symbol;Acc:620571]
ENSRNOT00000033726.5	1498	1300.42	23568	178.907	ENSRNOG00000023520.5	Cs	citrate synthase [Source:RGD Symbol;Acc:620330]
ENSRNOT00000016881.5	1354	1156.42	20942.7	178.774	ENSRNOG00000012641.5	Sfr1	SWI5-dependent homologous recombination repair protein 1 [Source:RGD Symbol;Acc:1305481]
ENSRNOT00000027985.7	1106	908.422	16426	178.498	ENSRNOG00000020619.7	Eif3g	eukaryotic translation initiation factor 3, subunit G [Source:RGD Symbol;Acc:1307191]
ENSRNOT00000056592.3	2611	2413.42	43491.5	177.894	ENSRNOG00000015642.6	Pabpc4	poly(A) binding protein, cytoplasmic 4 [Source:RGD Symbol;Acc:1305015]
ENSRNOT00000074685.2	565	368.361	6618.08	177.357	ENSRNOG00000046889.3	Dbi	diazepam binding inhibitor, acyl-CoA binding protein [Source:RGD Symbol;Acc:2490]
ENSRNOT00000074058.2	3135	2937.42	52766.9	177.331	ENSRNOG00000045752.2	Rrm1	ribonucleotide reductase catalytic subunit M1 [Source:RGD Symbol;Acc:1592569]
ENSRNOT00000013359.6	492	297.324	5326	176.832	ENSRNOG00000010029.6	Ubald2	UBA-like domain containing 2 [Source:RGD Symbol;Acc:1311298]
ENSRNOT00000022256.4	333	153.087	2736	176.427	ENSRNOG00000016561.4	Pclaf	PCNA clamp associated factor [Source:RGD Symbol;Acc:1303041]
ENSRNOT00000015575.7	1346	1148.42	20512	176.318	ENSRNOG00000010727.7	Ube2r2	ubiquitin-conjugating enzyme E2R 2 [Source:RGD Symbol;Acc:1594826]
ENSRNOT00000061747.3	4481	4283.42	76421.3	176.122	ENSRNOG00000014879.6	Ttc7a	tetratricopeptide repeat domain 7A [Source:RGD Symbol;Acc:1306211]
ENSRNOT00000027435.4	877	679.422	12119	176.083	ENSRNOG00000020233.4	Rabac1	Rab acceptor 1 [Source:RGD Symbol;Acc:621002]
ENSRNOT00000006890.7	891	693.422	12335	175.603	ENSRNOG00000005123.7	Emc2	ER membrane protein complex subunit 2 [Source:RGD Symbol;Acc:1310430]
ENSRNOT00000028496.4	1445	1247.42	22187	175.58	ENSRNOG00000020994.6	Slc25a39	solute carrier family 25, member 39 [Source:RGD Symbol;Acc:1306193]
ENSRNOT00000003605.7	5656	5458.42	97049.8	175.516	ENSRNOG00000002680.7	Lamc1	laminin subunit gamma 1 [Source:RGD Symbol;Acc:621052]
ENSRNOT00000091792.1	1201	1003.42	17829	175.401	ENSRNOG00000055756.1	Bcap31	B-cell receptor-associated protein 31 [Source:RGD Symbol;Acc:1302944]
ENSRNOT00000008478.4	4172	3974.42	70589	175.329	ENSRNOG00000006052.5	Sulf2	sulfatase 2 [Source:RGD Symbol;Acc:1305078]
ENSRNOT00000080142.1	1734	1536.42	27271.2	175.22	ENSRNOG00000014064.5	Ctsh	cathepsin H [Source:RGD Symbol;Acc:2447]
ENSRNOT00000019107.7	844	646.422	11462	175.039	ENSRNOG00000014201.7	Manf	mesencephalic astrocyte-derived neurotrophic factor [Source:RGD Symbol;Acc:1307252]
ENSRNOT00000022387.5	1867	1669.42	29558	174.783	ENSRNOG00000016419.6	Pdlim5	PDZ and LIM domain 5 [Source:RGD Symbol;Acc:621076]
ENSRNOT00000050232.3	1347	1149.42	20349	174.764	ENSRNOG00000008178.6	Nxn	nucleoredoxin [Source:RGD Symbol;Acc:1310489]
ENSRNOT00000010826.3	793	595.458	10539	174.718	ENSRNOG00000007971.6	Wbp2	WW domain binding protein 2 [Source:RGD Symbol;Acc:620032]
ENSRNOT00000052393.2	1036	838.422	14830.2	174.613	ENSRNOG00000034071.2	Chmp4bl1	chromatin modifying protein 4B-like 1 [Source:RGD Symbol;Acc:1583604]
ENSRNOT00000047698.5	3448	3250.42	57457.3	174.5	ENSRNOG00000031173.6	Snd1	staphylococcal nuclease and tudor domain containing 1 [Source:RGD Symbol;Acc:631340]
ENSRNOT00000019531.4	1832	1634.42	28815.2	174.039	ENSRNOG00000014160.4	Tcp1	t-complex 1 [Source:RGD Symbol;Acc:3832]
ENSRNOT00000078429.1	2752	2554.42	44992.5	173.875	ENSRNOG00000060005.1	Surf4	surfeit 4 [Source:RGD Symbol;Acc:1561980]
ENSRNOT00000001872.5	2190	1992.42	35075	173.782	ENSRNOG00000001385.5	Plbd2	phospholipase B domain containing 2 [Source:RGD Symbol;Acc:708461]
ENSRNOT00000030931.5	917	719.422	12652	173.606	ENSRNOG00000043328.3	Chmp2a	charged multivesicular body protein 2A [Source:RGD Symbol;Acc:1305050]
ENSRNOT00000008518.5	4432	4234.42	74430	173.518	ENSRNOG00000006247.7	Copa	coatomer protein complex subunit alpha [Source:RGD Symbol;Acc:1310525]
ENSRNOT00000075270.1	2622	2424.42	42576	173.359	ENSRNOG00000046794.1	Khdrbs1	KH RNA binding domain containing, signal transduction associated 1 [Source:RGD Symbol;Acc:621459]
ENSRNOT00000050562.4	935	737.422	12948	173.331	ENSRNOG00000019497.7	Mrpl17	mitochondrial ribosomal protein L17 [Source:RGD Symbol;Acc:70943]
ENSRNOT00000045096.2	666	468.631	8216	173.069	ENSRNOG00000034177.4	Efna5	ephrin A5 [Source:RGD Symbol;Acc:620391]
ENSRNOT00000026974.6	571	374.301	6561.26	173.044	ENSRNOG00000019908.6	Lamtor2	late endosomal/lysosomal adaptor, MAPK and MTOR activator 2 [Source:RGD Symbol;Acc:1562501]
ENSRNOT00000019040.4	2417	2219.42	38899.5	173.019	ENSRNOG00000014165.7	Ssr1	signal sequence receptor subunit 1 [Source:RGD Symbol;Acc:1310961]
ENSRNOT00000084443.1	297	123.853	2170	172.959	ENSRNOG00000056474.1	AC096239.2
ENSRNOT00000079469.1	234	77.7862	1362	172.848	ENSRNOG00000057601.1	AABR07044080.2
ENSRNOT00000011557.5	709	511.524	8952	172.76	ENSRNOG00000008733.5	Lsm3	LSM3 homolog, U6 small nuclear RNA and mRNA degradation associated [Source:RGD Symbol;Acc:1305971]
ENSRNOT00000077894.1	744	546.503	9542	172.36	ENSRNOG00000052357.1	Fosl2	FOS like 2, AP-1 transcription factor subunit [Source:RGD Symbol;Acc:2628]
ENSRNOT00000023606.6	1585	1387.42	24219	172.321	ENSRNOG00000017235.6	Atp6v0d1	ATPase H+ transporting V0 subunit D1 [Source:RGD Symbol;Acc:1306159]
ENSRNOT00000091095.1	2362	2164.42	37689	171.895	ENSRNOG00000051952.1	Tes	testin LIM domain protein [Source:RGD Symbol;Acc:1566346]
ENSRNOT00000021979.4	4399	4201.42	73111	171.781	ENSRNOG00000016242.4	Fzd1	frizzled class receptor 1 [Source:RGD Symbol;Acc:61916]
ENSRNOT00000027088.2	980	782.422	13600	171.588	ENSRNOG00000019980.2	Tomm20	translocase of outer mitochondrial membrane 20 [Source:RGD Symbol;Acc:708467]
ENSRNOT00000046035.4	475	280.93	4876.79	171.367	ENSRNOG00000032204.4	Uqcrb	ubiquinol-cytochrome c reductase binding protein [Source:RGD Symbol;Acc:1311971]
ENSRNOT00000023537.5	2558	2360.42	40914	171.109	ENSRNOG00000017354.6	Zyx	zyxin [Source:RGD Symbol;Acc:620698]
ENSRNOT00000001227.7	2200	2002.42	34698.9	171.06	ENSRNOG00000000923.8	Cct6a	chaperonin containing TCP1 subunit 6A [Source:RGD Symbol;Acc:1304763]
ENSRNOT00000086441.1	1020	822.422	14227.5	170.775	ENSRNOG00000048297.3	LOC108348175	protein quaking-like [Source:RGD Symbol;Acc:11514364]
ENSRNOT00000070818.3	3451	3253.42	56264.1	170.718	ENSRNOG00000047179.3	Aplp2	amyloid beta precursor like protein 2 [Source:RGD Symbol;Acc:2128]
ENSRNOT00000007577.5	676	478.583	8246	170.089	ENSRNOG00000005695.5	Mgp	matrix Gla protein [Source:RGD Symbol;Acc:3088]
ENSRNOT00000012279.4	2323	2125.42	36614	170.056	ENSRNOG00000008921.4	Dynll2	dynein light chain LC8-type 2 [Source:RGD Symbol;Acc:619860]
ENSRNOT00000022201.5	919	721.422	12426	170.032	ENSRNOG00000016383.5	Commd3	COMM domain containing 3 [Source:RGD Symbol;Acc:735116]
ENSRNOT00000018173.6	1189	991.422	17069.5	169.962	ENSRNOG00000013493.6	Psma4	proteasome 20S subunit alpha 4 [Source:RGD Symbol;Acc:61846]
ENSRNOT00000014637.6	1920	1722.42	29650.6	169.935	ENSRNOG00000010800.6	Hadhb	hydroxyacyl-CoA dehydrogenase trifunctional multienzyme complex subunit beta [Source:RGD Symbol;Acc:620513]
ENSRNOT00000022000.4	1471	1273.42	21869	169.53	ENSRNOG00000016166.4	Pdlim1	PDZ and LIM domain 1 [Source:RGD Symbol;Acc:68324]
ENSRNOT00000072573.2	255	92.3548	1584.85	169.402	ENSRNOG00000050473.2	Rps27l	ribosomal protein S27-like [Source:RGD Symbol;Acc:1595396]
ENSRNOT00000002114.6	2307	2109.42	36133	169.095	ENSRNOG00000001548.6	Nfe2l2	nuclear factor, erythroid 2-like 2 [Source:RGD Symbol;Acc:620360]
ENSRNOT00000073846.1	759	561.481	9615	169.045	ENSRNOG00000046109.1	LOC689574	hypothetical protein LOC689574 [Source:RGD Symbol;Acc:1591053]
ENSRNOT00000009985.5	3341	3143.42	53820	169.017	ENSRNOG00000007234.5	Cyp51	cytochrome P450, family 51 [Source:RGD Symbol;Acc:2481]
ENSRNOT00000011174.5	1640	1442.42	24680.7	168.91	ENSRNOG00000007998.5	Ssb	small RNA binding exonuclease protection factor La [Source:RGD Symbol;Acc:620804]
ENSRNOT00000017601.6	963	765.422	13079.8	168.69	ENSRNOG00000013190.6	Rnaset2	ribonuclease T2 [Source:RGD Symbol;Acc:1309918]
ENSRNOT00000083843.1	2144	1946.42	33214.5	168.454	ENSRNOG00000014562.6	Hnrnpf	heterogeneous nuclear ribonucleoprotein F [Source:RGD Symbol;Acc:620366]
ENSRNOT00000002429.5	1984	1786.42	30482.6	168.445	ENSRNOG00000001783.6	Tra2b	transformer 2 beta homolog [Source:RGD Symbol;Acc:619886]
ENSRNOT00000090378.1	1785	1587.42	27072.6	168.356	ENSRNOG00000011621.7	Hnrnpc	heterogeneous nuclear ribonucleoprotein C [Source:RGD Symbol;Acc:1309982]
ENSRNOT00000015946.4	1174	976.422	16649	168.322	ENSRNOG00000011745.4	Psma1	proteasome 20S subunit alpha 1 [Source:RGD Symbol;Acc:61841]
ENSRNOT00000011371.6	2896	2698.42	45945.4	168.082	ENSRNOG00000008393.8	Tax1bp1	Tax1 binding protein 1 [Source:RGD Symbol;Acc:708579]
ENSRNOT00000049822.3	1304	1106.42	18793	167.674	ENSRNOG00000012455.6	Tardbp	TAR DNA binding protein [Source:RGD Symbol;Acc:1310906]
ENSRNOT00000092622.1	766	568.47	9635.14	167.317	ENSRNOG00000046548.2	Rhox5	Rhox homeobox family member 5 [Source:RGD Symbol;Acc:3295]
ENSRNOT00000013445.5	2143	1945.42	32877	166.828	ENSRNOG00000009552.6	Serinc3	serine incorporator 3 [Source:RGD Symbol;Acc:1308390]
ENSRNOT00000019419.5	3273	3075.42	51967	166.806	ENSRNOG00000014162.5	Plekhb2	pleckstrin homology domain containing B2 [Source:RGD Symbol;Acc:1310954]
ENSRNOT00000018603.5	1354	1156.42	19539	166.792	ENSRNOG00000013889.6	Tmed3	transmembrane p24 trafficking protein 3 [Source:RGD Symbol;Acc:1303327]
ENSRNOT00000085237.1	2240	2042.42	34493.2	166.716	ENSRNOG00000016758.7	Loxl2	lysyl oxidase-like 2 [Source:RGD Symbol;Acc:1308435]
ENSRNOT00000085470.1	2001	1803.42	30429	166.564	ENSRNOG00000017251.6	Wdr55	WD repeat domain 55 [Source:RGD Symbol;Acc:1305640]
ENSRNOT00000082385.1	858	660.422	11138.6	166.495	ENSRNOG00000003720.6	Prrx1	paired related homeobox 1 [Source:RGD Symbol;Acc:628884]
ENSRNOT00000014859.8	3294	3096.42	52187	166.376	ENSRNOG00000010989.8	Ipo5	importin 5 [Source:RGD Symbol;Acc:1308715]
ENSRNOT00000023221.7	1037	839.422	14142	166.311	ENSRNOG00000017279.7	Tmem50a	transmembrane protein 50A [Source:RGD Symbol;Acc:1305638]
ENSRNOT00000001467.7	582	385.157	6469	165.802	ENSRNOG00000001106.7	Denr	density regulated reinitiation and release factor [Source:RGD Symbol;Acc:1584200]
ENSRNOT00000035650.2	3870	3672.42	61641	165.694	ENSRNOG00000019724.6	Ganab	glucosidase II alpha subunit [Source:RGD Symbol;Acc:1309775]
ENSRNOT00000020446.4	750	552.492	9266	165.56	ENSRNOG00000015205.6	Cyb5a	cytochrome b5 type A [Source:RGD Symbol;Acc:620558]
ENSRNOT00000013488.4	1961	1763.42	29571	165.539	ENSRNOG00000009934.4	Emc3	ER membrane protein complex subunit 3 [Source:RGD Symbol;Acc:1311566]
ENSRNOT00000006297.5	696	498.535	8338	165.104	ENSRNOG00000004723.5	Fcf1	FCF1 rRNA-processing protein [Source:RGD Symbol;Acc:1310899]
ENSRNOT00000015757.3	1626	1428.42	23879	165.025	ENSRNOG00000011414.5	Psmc3	proteasome 26S subunit, ATPase 3 [Source:RGD Symbol;Acc:61905]
ENSRNOT00000046490.3	1755	1557.42	26011.8	164.875	ENSRNOG00000010756.7	Tp53	tumor protein p53 [Source:RGD Symbol;Acc:3889]
ENSRNOT00000012700.4	693	495.535	8272	164.788	ENSRNOG00000009425.4	Fgf7	fibroblast growth factor 7 [Source:RGD Symbol;Acc:61805]
ENSRNOT00000092558.1	545	348.784	5820.99	164.752	ENSRNOG00000001068.7	Rac1	Rac family small GTPase 1 [Source:RGD Symbol;Acc:619755]
ENSRNOT00000001115.6	1700	1502.42	25056.8	164.636	ENSRNOG00000000841.7	Ddx39b	DExD-box helicase 39B [Source:RGD Symbol;Acc:70923]
ENSRNOT00000035048.4	1750	1552.42	25875.1	164.536	ENSRNOG00000025580.5	LOC100912618	ubiquitin-conjugating enzyme E2 variant 1-like [Source:RGD Symbol;Acc:6486058]
ENSRNOT00000000673.4	2625	2427.42	40452.7	164.51	ENSRNOG00000000557.5	Ppa1	inorganic pyrophosphatase 1 [Source:RGD Symbol;Acc:1589773]
ENSRNOT00000061878.4	3250	3052.42	50838	164.412	ENSRNOG00000006130.7	Rab5b	RAB5B, member RAS oncogene family [Source:RGD Symbol;Acc:1306489]
ENSRNOT00000072434.2	1642	1444.42	24033.9	164.256	ENSRNOG00000046094.2	Cd151	CD151 molecule (Raph blood group) [Source:RGD Symbol;Acc:621290]
ENSRNOT00000072930.2	195	52.8944	878.122	163.883	ENSRNOG00000050796.2	AABR07026893.1
ENSRNOT00000082686.1	922	724.422	12009	163.646	ENSRNOG00000056853.1	Psma7	proteasome 20S subunit alpha 7 [Source:RGD Symbol;Acc:61851]
ENSRNOT00000084171.1	3974	3776.42	62548.9	163.504	ENSRNOG00000040287.4	Cyp1b1	cytochrome P450, family 1, subfamily b, polypeptide 1 [Source:RGD Symbol;Acc:2460]
ENSRNOT00000026153.5	1576	1378.42	22814.4	163.387	ENSRNOG00000019281.5	Glmp	glycosylated lysosomal membrane protein [Source:RGD Symbol;Acc:1303130]
ENSRNOT00000021162.6	5812	5614.42	92922	163.382	ENSRNOG00000015655.6	Ptgfrn	prostaglandin F2 receptor inhibitor [Source:RGD Symbol;Acc:3437]
ENSRNOT00000001438.7	1791	1593.42	26347	163.226	ENSRNOG00000001083.7	Kdelr2	KDEL endoplasmic reticulum protein retention receptor 2 [Source:RGD Symbol;Acc:1304618]
ENSRNOT00000010579.7	950	752.422	12438	163.184	ENSRNOG00000007743.7	Mgst1	microsomal glutathione S-transferase 1 [Source:RGD Symbol;Acc:70927]
ENSRNOT00000041606.3	1814	1616.42	26709.7	163.119	ENSRNOG00000003338.6	Pmp22	peripheral myelin protein 22 [Source:RGD Symbol;Acc:3359]
ENSRNOT00000082151.1	3513	3315.42	54752.7	163.026	ENSRNOG00000018404.7	Aars	alanyl-tRNA synthetase [Source:RGD Symbol;Acc:1304832]
ENSRNOT00000001958.4	1319	1121.42	18498	162.834	ENSRNOG00000001440.4	Mdh2	malate dehydrogenase 2 [Source:RGD Symbol;Acc:619719]
ENSRNOT00000013600.4	1102	904.422	14891	162.533	ENSRNOG00000010184.4	Brk1	BRICK1 subunit of SCAR/WAVE actin nucleating complex [Source:RGD Symbol;Acc:1598136]
ENSRNOT00000023786.5	1434	1236.42	20355	162.515	ENSRNOG00000017447.5	Eif2s2	eukaryotic translation initiation factor 2 subunit beta [Source:RGD Symbol;Acc:735192]
ENSRNOT00000070851.1	192	51.1235	840.426	162.281	ENSRNOG00000046450.1	AABR07032904.1
ENSRNOT00000054955.2	1335	1137.42	18680.6	162.129	ENSRNOG00000036687.3	Alyref	Aly/REF export factor [Source:RGD Symbol;Acc:1594679]
ENSRNOT00000021400.4	2088	1890.42	31032	162.047	ENSRNOG00000015591.5	Cndp2	carnosine dipeptidase 2 [Source:RGD Symbol;Acc:1305827]
ENSRNOT00000006578.5	1573	1375.42	22572.1	162.004	ENSRNOG00000004904.5	Pa2g4	proliferation-associated 2G4 [Source:RGD Symbol;Acc:1302994]
ENSRNOT00000024914.5	2451	2253.42	36967	161.943	ENSRNOG00000018457.6	Ptpa	protein phosphatase 2 phosphatase activator [Source:RGD Symbol;Acc:1308354]
ENSRNOT00000073790.2	847	649.422	10651	161.902	ENSRNOG00000049780.2	Sri	sorcin [Source:RGD Symbol;Acc:1584485]
ENSRNOT00000059854.3	1251	1053.42	17266	161.8	ENSRNOG00000016581.6	Serpinb1a	serpin family B member 1A [Source:RGD Symbol;Acc:1306203]
ENSRNOT00000087850.1	3096	2898.42	47472.6	161.685	ENSRNOG00000007866.8	Clec2dl1	C-type lectin domain family 2 member D-like 1 [Source:RGD Symbol;Acc:1588698]
ENSRNOT00000077185.1	2310	2112.42	34581.5	161.604	ENSRNOG00000033663.5	P4ha2	prolyl 4-hydroxylase subunit alpha 2 [Source:RGD Symbol;Acc:1309673]
ENSRNOT00000064116.1	1285	1087.42	17788	161.48	ENSRNOG00000003829.6	Ap3s1	adaptor related protein complex 3 subunit sigma 1 [Source:RGD Symbol;Acc:1311115]
ENSRNOT00000086264.1	1603	1405.42	22899	160.842	ENSRNOG00000017558.6	Tubb2a	tubulin, beta 2A class IIa [Source:RGD Symbol;Acc:1588452]
ENSRNOT00000066670.3	5423	5225.42	85105.7	160.778	ENSRNOG00000013589.8	Cxcl12	C-X-C motif chemokine ligand 12 [Source:RGD Symbol;Acc:3651]
ENSRNOT00000045326.3	3512	3314.42	53913	160.574	ENSRNOG00000034015.3	Capn2	calpain 2 [Source:RGD Symbol;Acc:2268]
ENSRNOT00000035890.5	555	358.578	5832	160.555	ENSRNOG00000028717.5	Ndufb7	NADH:ubiquinone oxidoreductase subunit B7 [Source:RGD Symbol;Acc:1308550]
ENSRNOT00000024617.7	1664	1466.42	23844.6	160.517	ENSRNOG00000018184.8	Tpm1	tropomyosin 1 [Source:RGD Symbol;Acc:3898]
ENSRNOT00000058423.4	1607	1409.42	22915	160.498	ENSRNOG00000038372.4	Ndufs2	NADH:ubiquinone oxidoreductase core subunit S2 [Source:RGD Symbol;Acc:1307109]
ENSRNOT00000086633.1	3067	2869.42	46627	160.41	ENSRNOG00000059947.1	Sdc1	syndecan 1 [Source:RGD Symbol;Acc:3648]
ENSRNOT00000038448.5	1051	853.422	13863.8	160.364	ENSRNOG00000027360.6	Srsf7	serine and arginine rich splicing factor 7 [Source:RGD Symbol;Acc:1307425]
ENSRNOT00000033015.4	1857	1659.42	26928.3	160.192	ENSRNOG00000020255.6	Sars1	seryl-tRNA synthetase 1 [Source:RGD Symbol;Acc:628813]
ENSRNOT00000085843.1	2077	1879.42	30466.3	160.024	ENSRNOG00000057676.1	Polr2m	RNA polymerase II subunit M [Source:RGD Symbol;Acc:619847]
ENSRNOT00000038537.5	5617	5419.42	87746	159.832	ENSRNOG00000000567.7	Unc5b	unc-5 netrin receptor B [Source:RGD Symbol;Acc:621756]
ENSRNOT00000030344.4	1875	1677.42	27147	159.76	ENSRNOG00000018568.6	Rab5c	RAB5C, member RAS oncogene family [Source:RGD Symbol;Acc:1307095]
ENSRNOT00000077930.1	201	56.5033	914	159.684	ENSRNOG00000057080.1	AABR07030926.1
ENSRNOT00000093404.1	159	33.4818	541	159.506	ENSRNOG00000049952.3	Gucd1	guanylyl cyclase domain containing 1 [Source:RGD Symbol;Acc:1597571]
ENSRNOT00000078761.1	2375	2177.42	35077.4	159.028	ENSRNOG00000001269.6	Ppp1cc	protein phosphatase 1 catalytic subunit gamma [Source:RGD Symbol;Acc:3377]
ENSRNOT00000021514.5	1824	1626.42	26200.6	159.026	ENSRNOG00000036742.3	Uqcrc2	ubiquinol cytochrome c reductase core protein 2 [Source:RGD Symbol;Acc:1359150]
ENSRNOT00000058436.3	805	607.458	9784.7	159.009	ENSRNOG00000038375.3	AABR07026311.1
ENSRNOT00000066674.2	2083	1885.42	30365	158.984	ENSRNOG00000002848.7	Maoa	monoamine oxidase A [Source:RGD Symbol;Acc:61898]
ENSRNOT00000092282.1	845	647.422	10425.6	158.965	ENSRNOG00000018320.6	Rps15a	ribosomal protein S15a [Source:RGD Symbol;Acc:619939]
ENSRNOT00000038612.5	3295	3097.42	49870.4	158.94	ENSRNOG00000024128.6	Aco2	aconitase 2 [Source:RGD Symbol;Acc:621360]
ENSRNOT00000075819.2	528	332.084	5339.79	158.732	ENSRNOG00000047225.2	Tma7	translation machinery associated 7 homolog [Source:RGD Symbol;Acc:1584795]
ENSRNOT00000019059.5	1668	1470.42	23571.2	158.245	ENSRNOG00000013949.7	Idh2	isocitrate dehydrogenase (NADP(+)) 2 [Source:RGD Symbol;Acc:1597139]
ENSRNOT00000020767.6	6959	6761.42	108095	157.818	ENSRNOG00000015439.7	Man2a1	mannosidase, alpha, class 2A, member 1 [Source:RGD Symbol;Acc:3038]
ENSRNOT00000014912.6	2555	2357.42	37610	157.491	ENSRNOG00000011148.6	Ssr3	signal sequence receptor subunit 3 [Source:RGD Symbol;Acc:621630]
ENSRNOT00000026279.7	1338	1140.42	18168.3	157.267	ENSRNOG00000019246.7	Psme2	proteasome activator subunit 2 [Source:RGD Symbol;Acc:3430]
ENSRNOT00000009696.7	4309	4111.42	65460	157.171	ENSRNOG00000007338.8	Fbln2	fibulin 2 [Source:RGD Symbol;Acc:628685]
ENSRNOT00000025916.5	2563	2365.42	37500.8	156.502	ENSRNOG00000019113.7	Hnrnpk	heterogeneous nuclear ribonucleoprotein K [Source:RGD Symbol;Acc:71058]
ENSRNOT00000020810.7	1248	1050.42	16640	156.379	ENSRNOG00000015239.7	Ginm1	glycoprotein integral membrane 1 [Source:RGD Symbol;Acc:1309759]
ENSRNOT00000045484.4	1398	1200.42	19015	156.369	ENSRNOG00000031085.5	Ergic3	ERGIC and golgi 3 [Source:RGD Symbol;Acc:1308144]
ENSRNOT00000039186.3	1456	1258.42	19916.7	156.236	ENSRNOG00000025940.3	Mettl9	methyltransferase like 9 [Source:RGD Symbol;Acc:2311609]
ENSRNOT00000042114.4	1615	1417.42	22429	156.207	ENSRNOG00000032134.4	Uqcrc1	ubiquinol-cytochrome c reductase core protein 1 [Source:RGD Symbol;Acc:1303314]
ENSRNOT00000019323.5	1030	832.422	13147	155.91	ENSRNOG00000014058.5	Tomm22	translocase of outer mitochondrial membrane 22 [Source:RGD Symbol;Acc:1303260]
ENSRNOT00000001924.8	459	265.779	4196.23	155.858	ENSRNOG00000001420.8	Fis1	fission, mitochondrial 1 [Source:RGD Symbol;Acc:1306668]
ENSRNOT00000035060.4	969	771.422	12179	155.851	ENSRNOG00000025443.4	Map1lc3a	microtubule-associated protein 1 light chain 3 alpha [Source:RGD Symbol;Acc:735183]
ENSRNOT00000083714.1	1455	1257.42	19836	155.727	ENSRNOG00000053230.1	Fopnl	FGFR1OP N-terminal like [Source:RGD Symbol;Acc:1305823]
ENSRNOT00000085894.1	1727	1529.42	24086.7	155.467	ENSRNOG00000018184.8	Tpm1	tropomyosin 1 [Source:RGD Symbol;Acc:3898]
ENSRNOT00000087886.1	3895	3697.42	58193	155.368	ENSRNOG00000015173.7	Mbtps1	membrane-bound transcription factor peptidase, site 1 [Source:RGD Symbol;Acc:70935]
ENSRNOT00000020707.7	1072	874.422	13741	155.127	ENSRNOG00000025040.6	Gng10	G protein subunit gamma 10 [Source:RGD Symbol;Acc:621514]
ENSRNOT00000023485.4	1353	1155.42	18149	155.061	ENSRNOG00000017416.4	Ppic	peptidylprolyl isomerase C [Source:RGD Symbol;Acc:1303221]
ENSRNOT00000068020.2	2117	1919.42	30102.4	154.818	ENSRNOG00000008064.7	Naga	alpha-N-acetylgalactosaminidase [Source:RGD Symbol;Acc:1306025]
ENSRNOT00000090007.1	478	283.827	4439	154.391	ENSRNOG00000054689.1	Cox7b	cytochrome c oxidase subunit 7B [Source:RGD Symbol;Acc:727789]
ENSRNOT00000019647.2	1080	882.422	13795	154.325	ENSRNOG00000014654.2	LOC691807	RIKEN cDNA 1810037I17 gene [Source:MGI Symbol;Acc:MGI:1914954]
ENSRNOT00000020325.7	1894	1696.42	26482	154.101	ENSRNOG00000014645.7	Aldh7a1	aldehyde dehydrogenase 7 family, member A1 [Source:RGD Symbol;Acc:1308614]
ENSRNOT00000087627.1	689	491.554	7671.2	154.057	ENSRNOG00000033611.5	Wdr83os	WD repeat domain 83 opposite strand [Source:RGD Symbol;Acc:1564058]
ENSRNOT00000001319.7	1105	907.422	14159	154.033	ENSRNOG00000000996.7	Arpc1a	actin related protein 2/3 complex, subunit 1A [Source:RGD Symbol;Acc:620834]
ENSRNOT00000006190.4	2927	2729.42	42570.8	153.968	ENSRNOG00000004612.4	Ppp1cb	protein phosphatase 1 catalytic subunit beta [Source:RGD Symbol;Acc:3376]
ENSRNOT00000044108.5	4590	4392.42	68506.2	153.963	ENSRNOG00000022305.5	Abcc1	ATP binding cassette subfamily C member 1 [Source:RGD Symbol;Acc:3112]
ENSRNOT00000075480.2	2485	2287.42	35672	153.947	ENSRNOG00000049560.2	Glul	glutamate-ammonia ligase [Source:RGD Symbol;Acc:2710]
ENSRNOT00000018336.4	2277	2079.42	32404	153.832	ENSRNOG00000013331.5	Sdha	succinate dehydrogenase complex flavoprotein subunit A [Source:RGD Symbol;Acc:621557]
ENSRNOT00000064254.2	3228	3030.42	47205.9	153.774	ENSRNOG00000019534.7	Ap2a2	adaptor related protein complex 2 subunit alpha 2 [Source:RGD Symbol;Acc:71015]
ENSRNOT00000003891.6	1701	1503.42	23400	153.647	ENSRNOG00000002807.8	Septin9	septin 9 [Source:MGI Symbol;Acc:MGI:1858222]
ENSRNOT00000086193.1	1446	1248.42	19425.7	153.605	ENSRNOG00000046272.2	LOC103689931	heterogeneous nuclear ribonucleoprotein A/B [Source:RGD Symbol;Acc:9343685]
ENSRNOT00000010915.5	1822	1624.42	25250	153.445	ENSRNOG00000008703.6	Rnps1	RNA binding protein with serine rich domain 1 [Source:RGD Symbol;Acc:1307522]
ENSRNOT00000019285.5	1342	1144.42	17779.7	153.366	ENSRNOG00000014064.5	Ctsh	cathepsin H [Source:RGD Symbol;Acc:2447]
ENSRNOT00000024648.8	2116	1918.42	29801	153.347	ENSRNOG00000017751.8	Arl6ip1	ADP-ribosylation factor like GTPase 6 interacting protein 1 [Source:RGD Symbol;Acc:735205]
ENSRNOT00000017998.5	1278	1080.42	16775	153.271	ENSRNOG00000012616.5	Ppt1	palmitoyl-protein thioesterase 1 [Source:RGD Symbol;Acc:61994]
ENSRNOT00000021629.6	2759	2561.42	39767	153.261	ENSRNOG00000016137.6	Rad23b	RAD23 homolog B, nucleotide excision repair protein [Source:RGD Symbol;Acc:1562958]
ENSRNOT00000088161.1	114	15.0323	233.347	153.238	ENSRNOG00000024142.6	Arglu1	arginine and glutamate rich 1 [Source:RGD Symbol;Acc:1310061]
ENSRNOT00000061686.3	1859	1661.42	25777	153.159	ENSRNOG00000007136.6	Anxa7	annexin A7 [Source:RGD Symbol;Acc:621173]
ENSRNOT00000001820.4	1173	975.422	15127	153.091	ENSRNOG00000001346.4	Cops6	COP9 signalosome subunit 6 [Source:RGD Symbol;Acc:1309919]
ENSRNOT00000066253.2	969	771.422	11942.6	152.826	ENSRNOG00000001062.6	Kmt5a	lysine methyltransferase 5A [Source:RGD Symbol;Acc:1587560]
ENSRNOT00000017770.5	1769	1571.42	24283.9	152.551	ENSRNOG00000012957.7	Sh3glb1	SH3 domain -containing GRB2-like endophilin B1 [Source:RGD Symbol;Acc:1304859]
ENSRNOT00000068497.3	3224	3026.42	46755	152.506	ENSRNOG00000020412.7	Sf3b2	splicing factor 3b, subunit 2 [Source:RGD Symbol;Acc:1307159]
ENSRNOT00000014377.4	1267	1069.42	16518	152.475	ENSRNOG00000010628.4	Sec13	SEC13 homolog, nuclear pore and COPII coat complex component [Source:RGD Symbol;Acc:1359555]
ENSRNOT00000000052.4	1810	1612.42	24904	152.468	ENSRNOG00000000047.4	Cd82	Cd82 molecule [Source:RGD Symbol;Acc:69070]
ENSRNOT00000001499.6	1514	1316.42	20328	152.437	ENSRNOG00000001135.6	Wsb2	WD repeat and SOCS box-containing 2 [Source:RGD Symbol;Acc:1359599]
ENSRNOT00000068274.2	2219	2021.42	31211	152.419	ENSRNOG00000005686.6	Suclg2	succinate-CoA ligase, GDP-forming, beta subunit [Source:RGD Symbol;Acc:1305008]
ENSRNOT00000002876.5	2471	2273.42	35091	152.372	ENSRNOG00000002089.5	Ccng2	cyclin G2 [Source:RGD Symbol;Acc:1305002]
ENSRNOT00000091901.1	2828	2630.42	40574.9	152.272	ENSRNOG00000008825.6	Ssrp1	structure specific recognition protein 1 [Source:RGD Symbol;Acc:621143]
ENSRNOT00000088273.1	2931	2733.42	42144	152.201	ENSRNOG00000055365.1	Edem1	ER degradation enhancing alpha-mannosidase like protein 1 [Source:RGD Symbol;Acc:1563633]
ENSRNOT00000022419.4	1614	1416.42	21822	152.087	ENSRNOG00000016474.6	Tspan3	tetraspanin 3 [Source:RGD Symbol;Acc:1359444]
ENSRNOT00000000772.7	590	393.087	6047	151.859	ENSRNOG00000000622.7	Hint1	histidine triad nucleotide binding protein 1 [Source:RGD Symbol;Acc:1593411]
ENSRNOT00000013625.5	2917	2719.42	41817.9	151.801	ENSRNOG00000009997.5	Erap1	endoplasmic reticulum aminopeptidase 1 [Source:RGD Symbol;Acc:708542]
ENSRNOT00000025828.4	1740	1542.42	23709.5	151.743	ENSRNOG00000018972.4	Rab18	RAB18, member RAS oncogene family [Source:RGD Symbol;Acc:1308905]
ENSRNOT00000073019.2	3013	2815.42	43234	151.59	ENSRNOG00000047896.2	Kctd10	potassium channel tetramerization domain containing 10 [Source:RGD Symbol;Acc:1591979]
ENSRNOT00000014933.5	737	539.503	8281	151.523	ENSRNOG00000010912.5	Mrps25	mitochondrial ribosomal protein S25 [Source:RGD Symbol;Acc:1308770]
ENSRNOT00000019057.4	2084	1886.42	28945	151.469	ENSRNOG00000014153.4	Lhfpl6	LHFPL tetraspan subfamily member 6 [Source:RGD Symbol;Acc:1560177]
ENSRNOT00000014941.6	2394	2196.42	33660	151.282	ENSRNOG00000010984.6	Anxa11	annexin A11 [Source:RGD Symbol;Acc:1309911]
ENSRNOT00000007181.5	2150	1952.42	29913	151.243	ENSRNOG00000005397.5	Maea	macrophage erythroblast attacher [Source:RGD Symbol;Acc:1309877]
ENSRNOT00000083557.1	732	534.514	8187	151.201	ENSRNOG00000053172.1	Ssr4	signal sequence receptor subunit 4 [Source:RGD Symbol;Acc:62034]
ENSRNOT00000064272.3	1062	864.422	13239.4	151.193	ENSRNOG00000026109.6	Prmt1	protein arginine methyltransferase 1 [Source:RGD Symbol;Acc:62020]
ENSRNOT00000046155.6	2787	2589.42	39629	151.078	ENSRNOG00000017023.8	Tcf25	transcription factor 25 [Source:RGD Symbol;Acc:1309054]
ENSRNOT00000084202.1	2453	2255.42	34478	150.905	ENSRNOG00000058461.1	Sfpq	splicing factor proline and glutamine rich [Source:RGD Symbol;Acc:727923]
ENSRNOT00000056015.4	3238	3040.42	46375.7	150.573	ENSRNOG00000013538.7	Capza1	capping actin protein of muscle Z-line subunit alpha 1 [Source:RGD Symbol;Acc:1587438]
ENSRNOT00000040029.5	4779	4581.42	69625	150.022	ENSRNOG00000001738.8	Eif4g1	eukaryotic translation initiation factor 4 gamma, 1 [Source:RGD Symbol;Acc:1306144]
ENSRNOT00000011237.5	3079	2881.42	43720	149.783	ENSRNOG00000008116.5	Plpp3	phospholipid phosphatase 3 [Source:RGD Symbol;Acc:620454]
ENSRNOT00000012334.7	5552	5354.42	81240.2	149.778	ENSRNOG00000008749.7	Col5a1	collagen type V alpha 1 chain [Source:RGD Symbol;Acc:70920]
ENSRNOT00000090554.1	816	618.422	9370.67	149.581	ENSRNOG00000003846.7	Pitpna	phosphatidylinositol transfer protein, alpha [Source:RGD Symbol;Acc:61885]
ENSRNOT00000026710.5	3208	3010.42	45564	149.412	ENSRNOG00000019465.5	Gnai3	G protein subunit alpha i3 [Source:RGD Symbol;Acc:2714]
ENSRNOT00000083677.1	2728	2530.42	38283.4	149.351	ENSRNOG00000058646.1	Zfp36l1	zinc finger protein 36, C3H type-like 1 [Source:RGD Symbol;Acc:62009]
ENSRNOT00000055957.3	1772	1574.42	23815.1	149.321	ENSRNOG00000037113.3	Slfn2	schlafen 2 [Source:RGD Symbol;Acc:1308645]
ENSRNOT00000076772.2	1105	907.422	13723.2	149.292	ENSRNOG00000014445.7	Hp1bp3	heterochromatin protein 1, binding protein 3 [Source:RGD Symbol;Acc:735099]
ENSRNOT00000026831.5	2115	1917.42	28985	149.226	ENSRNOG00000019752.5	Slc29a1	solute carrier family 29 member 1 [Source:RGD Symbol;Acc:61899]
ENSRNOT00000036666.5	3789	3591.42	54283	149.206	ENSRNOG00000004072.6	Myo1c	myosin 1C [Source:RGD Symbol;Acc:620443]
ENSRNOT00000010253.4	836	638.422	9649	149.198	ENSRNOG00000007356.4	Chmp3	charged multivesicular body protein 3 [Source:RGD Symbol;Acc:708556]
ENSRNOT00000081196.1	3198	3000.42	45345	149.189	ENSRNOG00000061373.1	Loxl3	lysyl oxidase-like 3 [Source:RGD Symbol;Acc:1311011]
ENSRNOT00000006300.3	999	801.422	12110	149.167	ENSRNOG00000004757.3	Tmem158	transmembrane protein 158 [Source:RGD Symbol;Acc:708473]
ENSRNOT00000026280.4	2470	2272.42	34326.9	149.12	ENSRNOG00000019212.4	Tpp1	tripeptidyl peptidase 1 [Source:RGD Symbol;Acc:621296]
ENSRNOT00000020646.6	2274	2076.42	31364.1	149.11	ENSRNOG00000015295.6	Ctdsp1	CTD small phosphatase 1 [Source:RGD Symbol;Acc:1305629]
ENSRNOT00000086091.1	1418	1220.42	18424.4	149.03	ENSRNOG00000016831.6	Serpinh1	serpin family H member 1 [Source:RGD Symbol;Acc:69302]
ENSRNOT00000004653.3	1005	807.422	12186.5	148.994	ENSRNOG00000003269.3	Atp6v0e1	ATPase H+ transporting V0 subunit e1 [Source:RGD Symbol;Acc:621393]
ENSRNOT00000005658.3	1971	1773.42	26761	148.964	ENSRNOG00000003967.3	Vmp1	vacuole membrane protein 1 [Source:RGD Symbol;Acc:70367]
ENSRNOT00000025966.5	2043	1845.42	27810	148.763	ENSRNOG00000019184.5	Npr3	natriuretic peptide receptor 3 [Source:RGD Symbol;Acc:3196]
ENSRNOT00000034300.6	2793	2595.42	39090	148.678	ENSRNOG00000008680.7	Loxl1	lysyl oxidase-like 1 [Source:RGD Symbol;Acc:1308752]
ENSRNOT00000022241.5	1654	1456.42	21926.3	148.617	ENSRNOG00000016416.7	Rnh1	ribonuclease/angiogenin inhibitor 1 [Source:RGD Symbol;Acc:621398]
ENSRNOT00000031571.6	1870	1672.42	25177.3	148.612	ENSRNOG00000021881.7	Metap2	methionyl aminopeptidase 2 [Source:RGD Symbol;Acc:70995]
ENSRNOT00000083855.1	2318	2120.42	31895.8	148.491	ENSRNOG00000009434.7	RGD1310507	similar to RIKEN cDNA 1300017J02 [Source:RGD Symbol;Acc:1310507]
ENSRNOT00000018021.5	6153	5955.42	89546	148.431	ENSRNOG00000012002.6	Iqgap1	IQ motif containing GTPase activating protein 1 [Source:RGD Symbol;Acc:1311884]
ENSRNOT00000085226.1	1147	949.422	14252	148.186	ENSRNOG00000059017.1	AC106292.2
ENSRNOT00000078175.1	4304	4106.42	61525.1	147.903	ENSRNOG00000010048.6	Dctn1	dynactin subunit 1 [Source:RGD Symbol;Acc:62038]
ENSRNOT00000043543.2	934	736.422	11002	147.48	ENSRNOG00000031041.2	Rps4y2	ribosomal protein S4, Y-linked 2 [Source:RGD Symbol;Acc:1590988]
ENSRNOT00000005329.6	1614	1416.42	21132	147.278	ENSRNOG00000003951.6	Psmc1	proteasome 26S subunit, ATPase 1 [Source:RGD Symbol;Acc:621097]
ENSRNOT00000029753.3	1894	1696.42	25272	147.06	ENSRNOG00000005804.6	Eif3d	eukaryotic translation initiation factor 3, subunit D [Source:RGD Symbol;Acc:1303255]
ENSRNOT00000087555.1	2375	2177.42	32399.1	146.886	ENSRNOG00000006148.6	RGD1310352	similar to HTGN29 protein; keratinocytes associated transmembrane protein 2 [Source:RGD Symbol;Acc:1310352]
ENSRNOT00000074814.1	1103	905.422	13466	146.817	ENSRNOG00000048622.1	Sin3b	SIN3 transcription regulator family member B [Source:RGD Symbol;Acc:1587989]
ENSRNOT00000011653.6	761	563.481	8344	146.179	ENSRNOG00000008794.6	Ube2e1	ubiquitin-conjugating enzyme E2E 1 [Source:RGD Symbol;Acc:2324438]
ENSRNOT00000073140.2	1500	1302.42	19285	146.17	ENSRNOG00000045791.2	Eif4a3	eukaryotic translation initiation factor 4A3 [Source:RGD Symbol;Acc:1591139]
ENSRNOT00000072870.2	498	303.095	4483	146.009	ENSRNOG00000046883.2	Mydgf	myeloid-derived growth factor [Source:RGD Symbol;Acc:1589603]
ENSRNOT00000019761.6	2363	2165.42	32023	145.985	ENSRNOG00000014690.6	Pigt	phosphatidylinositol glycan anchor biosynthesis, class T [Source:RGD Symbol;Acc:1307156]
ENSRNOT00000081249.1	2980	2782.42	41127.7	145.915	ENSRNOG00000055012.1	LOC108348078	ATP-dependent zinc metalloprotease YME1L1 [Source:RGD Symbol;Acc:11358998]
ENSRNOT00000037844.3	2754	2556.42	37783	145.899	ENSRNOG00000023896.4	Dusp6	dual specificity phosphatase 6 [Source:RGD Symbol;Acc:70978]
ENSRNOT00000037699.3	3137	2939.42	43412	145.793	ENSRNOG00000023910.3	Man2b1	mannosidase, alpha, class 2B, member 1 [Source:RGD Symbol;Acc:3039]
ENSRNOT00000016237.3	2456	2258.42	33335	145.709	ENSRNOG00000011771.3	Ptp4a1	protein tyrosine phosphatase 4A1 [Source:RGD Symbol;Acc:61970]
ENSRNOT00000093497.1	1232	1034.42	15255.2	145.582	ENSRNOG00000019357.8	Tax1bp3	Tax1 binding protein 3 [Source:RGD Symbol;Acc:1308924]
ENSRNOT00000078532.1	852	654.422	9645.03	145.491	ENSRNOG00000016885.6	Klf6	Kruppel-like factor 6 [Source:RGD Symbol;Acc:62389]
ENSRNOT00000060568.4	3348	3150.42	46415	145.438	ENSRNOG00000016779.7	Fam120a	family with sequence similarity 120A [Source:RGD Symbol;Acc:1306643]
ENSRNOT00000012240.4	1818	1620.42	23813	145.069	ENSRNOG00000009057.4	Sec62	SEC62 homolog, preprotein translocation factor [Source:RGD Symbol;Acc:1308862]
ENSRNOT00000015618.6	884	686.422	10049	144.518	ENSRNOG00000011463.6	Psmb2	proteasome 20S subunit beta 2 [Source:RGD Symbol;Acc:61874]
ENSRNOT00000083743.1	2862	2664.42	38979.1	144.417	ENSRNOG00000008944.7	Ext2	exostosin glycosyltransferase 2 [Source:RGD Symbol;Acc:1307707]
ENSRNOT00000077884.1	3285	3087.42	45043.8	144.022	ENSRNOG00000054775.1	Fkbp11	FKBP prolyl isomerase 11 [Source:RGD Symbol;Acc:1306161]
ENSRNOT00000023651.6	1047	849.422	12381	143.887	ENSRNOG00000017506.7	Cltb	clathrin, light chain B [Source:RGD Symbol;Acc:621353]
ENSRNOT00000015468.5	2911	2713.42	39543	143.861	ENSRNOG00000011592.5	Lrp10	LDL receptor related protein 10 [Source:RGD Symbol;Acc:1310471]
ENSRNOT00000027345.5	2900	2702.42	39356.4	143.765	ENSRNOG00000020167.5	Reep5	receptor accessory protein 5 [Source:RGD Symbol;Acc:1306047]
ENSRNOT00000028271.3	3691	3493.42	50857	143.711	ENSRNOG00000020812.3	Gys1	glycogen synthase 1 [Source:RGD Symbol;Acc:1589798]
ENSRNOT00000001593.4	640	442.667	6443	143.681	ENSRNOG00000001201.4	Cstb	cystatin B [Source:RGD Symbol;Acc:2435]
ENSRNOT00000092513.1	528	332.084	4832.69	143.658	ENSRNOG00000018320.6	Rps15a	ribosomal protein S15a [Source:RGD Symbol;Acc:619939]
ENSRNOT00000092178.2	3417	3219.42	46819.5	143.562	ENSRNOG00000052326.2	Uba1y	ubiquitin-activating enzyme, Chr Y [Source:RGD Symbol;Acc:3925]
ENSRNOT00000010409.4	1104	906.422	13174	143.475	ENSRNOG00000006331.4	Elovl5	ELOVL fatty acid elongase 5 [Source:RGD Symbol;Acc:620583]
ENSRNOT00000082628.1	2769	2571.42	37354	143.401	ENSRNOG00000060912.1	Qars1	glutaminyl-tRNA synthetase 1 [Source:RGD Symbol;Acc:1359448]
ENSRNOT00000008150.5	2884	2686.42	39009.3	143.345	ENSRNOG00000005355.7	Ncstn	nicastrin [Source:RGD Symbol;Acc:631418]
ENSRNOT00000080441.2	3175	2977.42	43131.1	143.001	ENSRNOG00000056639.2	LOC103694557	ubiquitin-like modifier-activating enzyme 1 Y [Source:RGD Symbol;Acc:9252298]
ENSRNOT00000018240.5	1624	1426.42	20611	142.64	ENSRNOG00000013514.5	Maf1	MAF1 homolog, negative regulator of RNA polymerase III [Source:RGD Symbol;Acc:1359315]
ENSRNOT00000018005.7	873	675.422	9759	142.633	ENSRNOG00000013386.7	Psmb5	proteasome 20S subunit beta 5 [Source:RGD Symbol;Acc:61879]
ENSRNOT00000015518.4	1575	1377.42	19872	142.418	ENSRNOG00000011661.5	Hnrnph2	heterogeneous nuclear ribonucleoprotein H2 [Source:RGD Symbol;Acc:1549784]
ENSRNOT00000005551.4	2025	1827.42	26347	142.325	ENSRNOG00000004143.4	Adipor1	adiponectin receptor 1 [Source:RGD Symbol;Acc:1303151]
ENSRNOT00000056600.2	486	291.526	4199	142.187	ENSRNOG00000037402.2	Cops9	COP9 signalosome subunit 9 [Source:RGD Symbol;Acc:1596701]
ENSRNOT00000027756.6	1359	1161.42	16713	142.054	ENSRNOG00000020440.6	Fads2	fatty acid desaturase 2 [Source:RGD Symbol;Acc:68339]
ENSRNOT00000009073.7	1380	1182.42	17013.9	142.043	ENSRNOG00000006094.8	Cd44	CD44 molecule (Indian blood group) [Source:RGD Symbol;Acc:2307]
ENSRNOT00000009870.6	2822	2624.42	37750.4	141.996	ENSRNOG00000006756.8	Maged1	MAGE family member D1 [Source:RGD Symbol;Acc:70898]
ENSRNOT00000013375.4	1377	1179.42	16964	141.987	ENSRNOG00000009432.4	Eif2s1	eukaryotic translation initiation factor 2 subunit alpha [Source:RGD Symbol;Acc:620963]
ENSRNOT00000072917.2	666	468.631	6733.75	141.846	ENSRNOG00000046585.2	AABR07054370.1	charged multivesicular body protein 4B [Source:NCBI gene;Acc:100359642]
ENSRNOT00000037016.6	1126	928.422	13339.8	141.838	ENSRNOG00000023375.6	Rab34	RAB34, member RAS oncogene family [Source:RGD Symbol;Acc:1305058]
ENSRNOT00000003940.3	863	665.422	9554	141.735	ENSRNOG00000002946.3	Socs3	suppressor of cytokine signaling 3 [Source:RGD Symbol;Acc:621087]
ENSRNOT00000065393.2	2037	1839.42	26362.3	141.479	ENSRNOG00000005428.8	Ctbp1	C-terminal binding protein 1 [Source:RGD Symbol;Acc:2441]
ENSRNOT00000013571.5	1479	1281.42	18365	141.478	ENSRNOG00000010021.5	Isy1	ISY1 splicing factor homolog [Source:RGD Symbol;Acc:1307688]
ENSRNOT00000091374.1	1911	1713.42	24555.3	141.472	ENSRNOG00000056009.1	Rab11fip5	RAB11 family interacting protein 5 [Source:RGD Symbol;Acc:1592069]
ENSRNOT00000064910.2	4100	3902.42	55807	141.171	ENSRNOG00000001172.7	Rnf10	ring finger protein 10 [Source:RGD Symbol;Acc:1309282]
ENSRNOT00000046159.4	2631	2433.42	34798	141.165	ENSRNOG00000001862.7	Ube2l3	ubiquitin-conjugating enzyme E2L 3 [Source:RGD Symbol;Acc:1308361]
ENSRNOT00000064542.1	4291	4093.42	58521	141.129	ENSRNOG00000011157.6	Jak1	Janus kinase 1 [Source:RGD Symbol;Acc:69056]
ENSRNOT00000082159.1	1116	918.422	13117.6	140.994	ENSRNOG00000056398.1	AABR07036855.1
ENSRNOT00000076198.1	1477	1279.42	18262.7	140.909	ENSRNOG00000051193.1	AABR07010030.2
ENSRNOT00000044171.2	1849	1651.42	23562	140.846	ENSRNOG00000032297.2	Msmo1	methylsterol monooxygenase 1 [Source:RGD Symbol;Acc:620281]
ENSRNOT00000055245.3	2883	2685.42	38308.8	140.824	ENSRNOG00000036816.3	Wls	Wnt ligand secretion mediator [Source:RGD Symbol;Acc:735139]
ENSRNOT00000013324.6	1232	1034.42	14716.9	140.445	ENSRNOG00000009512.6	Esd	esterase D [Source:RGD Symbol;Acc:1592114]
ENSRNOT00000018248.6	967	769.422	10940	140.359	ENSRNOG00000013507.7	Selenot	selenoprotein T [Source:RGD Symbol;Acc:1359128]
ENSRNOT00000016871.7	1174	976.422	13865.7	140.182	ENSRNOG00000012156.7	Ostf1	osteoclast stimulating factor 1 [Source:RGD Symbol;Acc:628849]
ENSRNOT00000080887.1	2380	2182.42	30974	140.103	ENSRNOG00000056728.1	G6pd	glucose-6-phosphate dehydrogenase [Source:RGD Symbol;Acc:2645]
ENSRNOT00000088623.1	6350	6152.42	87258.1	140.007	ENSRNOG00000007133.7	Plxnb2	plexin B2 [Source:RGD Symbol;Acc:1305495]
ENSRNOT00000057895.4	427	235.81	3341.95	139.903	ENSRNOG00000038045.4	AC128960.1
ENSRNOT00000085026.1	1720	1522.42	21565	139.831	ENSRNOG00000057078.1	Ddit4	DNA-damage-inducible transcript 4 [Source:RGD Symbol;Acc:621731]
ENSRNOT00000086608.1	824	626.422	8870.94	139.795	ENSRNOG00000052730.1	Psmb3	proteasome 20S subunit beta 3 [Source:RGD Symbol;Acc:61875]
ENSRNOT00000021751.4	2551	2353.42	33320	139.764	ENSRNOG00000016152.4	Dek	DEK proto-oncogene [Source:RGD Symbol;Acc:1303246]
ENSRNOT00000027381.7	1052	854.422	12087.2	139.651	ENSRNOG00000020178.7	Cope	coatomer protein complex, subunit epsilon [Source:RGD Symbol;Acc:1306785]
ENSRNOT00000023252.7	2250	2052.42	29033	139.642	ENSRNOG00000017163.7	Pfkp	phosphofructokinase, platelet [Source:RGD Symbol;Acc:61893]
ENSRNOT00000023379.4	1503	1305.42	18460.8	139.601	ENSRNOG00000017352.4	Ctdnep1	CTD nuclear envelope phosphatase 1 [Source:RGD Symbol;Acc:1310172]
ENSRNOT00000044956.2	1213	1015.42	14354.1	139.546	ENSRNOG00000010186.7	Cdv3	CDV3 homolog [Source:RGD Symbol;Acc:1359113]
ENSRNOT00000025510.4	1277	1079.42	15247.9	139.446	ENSRNOG00000018818.6	Txnl1	thioredoxin-like 1 [Source:RGD Symbol;Acc:621717]
ENSRNOT00000006566.6	3926	3728.42	52484.6	138.962	ENSRNOG00000046159.2	Gns	glucosamine (N-acetyl)-6-sulfatase [Source:RGD Symbol;Acc:1305877]
ENSRNOT00000037517.5	1086	888.422	12499	138.882	ENSRNOG00000006949.6	C1qbp	complement C1q binding protein [Source:RGD Symbol;Acc:2230]
ENSRNOT00000070978.2	1317	1119.42	15746	138.856	ENSRNOG00000048834.2	Plin3	perilipin 3 [Source:RGD Symbol;Acc:1595854]
ENSRNOT00000088355.1	2407	2209.42	31062.4	138.786	ENSRNOG00000061910.1	Igfbp3	insulin-like growth factor binding protein 3 [Source:RGD Symbol;Acc:2874]
ENSRNOT00000014997.5	240	82.0006	1152	138.684	ENSRNOG00000011279.5	Cmc2	C-x(9)-C motif containing 2 [Source:RGD Symbol;Acc:2324599]
ENSRNOT00000028051.4	2140	1942.42	27277	138.625	ENSRNOG00000020652.4	Tgfb1	transforming growth factor, beta 1 [Source:RGD Symbol;Acc:69051]
ENSRNOT00000078013.1	1127	929.422	13045.1	138.556	ENSRNOG00000009512.6	Esd	esterase D [Source:RGD Symbol;Acc:1592114]
ENSRNOT00000090773.1	1472	1274.42	17865	138.382	ENSRNOG00000053659.1	RGD1311703	similar to sid2057p [Source:RGD Symbol;Acc:1311703]
ENSRNOT00000016112.7	1630	1432.42	20049	138.169	ENSRNOG00000011853.7	Mbd2	methyl-CpG binding domain protein 2 [Source:RGD Symbol;Acc:1595452]
ENSRNOT00000048854.6	3388	3190.42	44651.4	138.158	ENSRNOG00000006997.8	App	amyloid beta precursor protein [Source:RGD Symbol;Acc:2139]
ENSRNOT00000057177.3	2108	1910.42	26688	137.904	ENSRNOG00000018390.6	Pld3	phospholipase D family, member 3 [Source:RGD Symbol;Acc:1308248]
ENSRNOT00000018489.5	2173	1975.42	27565	137.749	ENSRNOG00000013790.5	Mfsd1	major facilitator superfamily domain containing 1 [Source:RGD Symbol;Acc:1305751]
ENSRNOT00000029996.2	2969	2771.42	38668	137.733	ENSRNOG00000027487.2	Trim28	tripartite motif-containing 28 [Source:RGD Symbol;Acc:620289]
ENSRNOT00000017211.6	3088	2890.42	40323	137.715	ENSRNOG00000012751.7	Tm9sf2	transmembrane 9 superfamily member 2 [Source:RGD Symbol;Acc:1359230]
ENSRNOT00000023014.3	1061	863.422	12032	137.564	ENSRNOG00000016866.3	Fhl2	four and a half LIM domains 2 [Source:RGD Symbol;Acc:61963]
ENSRNOT00000059564.4	2139	1941.42	27035.5	137.469	ENSRNOG00000018456.7	LOC100911664	uncharacterized LOC100911664 [Source:RGD Symbol;Acc:6491729]
ENSRNOT00000022406.6	1222	1024.42	14256.4	137.379	ENSRNOG00000016227.6	Glrx3	glutaredoxin 3 [Source:RGD Symbol;Acc:69414]
ENSRNOT00000056237.3	3548	3350.42	46602.5	137.309	ENSRNOG00000021213.6	Lix1l	limb and CNS expressed 1 like [Source:RGD Symbol;Acc:1593161]
ENSRNOT00000025570.3	8069	7871.42	109459	137.274	ENSRNOG00000018668.3	Glg1	golgi glycoprotein 1 [Source:RGD Symbol;Acc:69345]
ENSRNOT00000041237.5	1827	1629.42	22607.9	136.967	ENSRNOG00000031421.5	Eif1a	eukaryotic translation initiation factor 1A [Source:RGD Symbol;Acc:1306331]
ENSRNOT00000000018.7	1280	1082.42	15012	136.909	ENSRNOG00000000017.7	Steap1	STEAP family member 1 [Source:RGD Symbol;Acc:1311543]
ENSRNOT00000074586.2	1139	941.422	13051	136.851	ENSRNOG00000050869.2	Cebpd	CCAAT/enhancer binding protein delta [Source:RGD Symbol;Acc:2328]
ENSRNOT00000028373.6	2114	1916.42	26560	136.813	ENSRNOG00000020897.6	Prpf19	pre-mRNA processing factor 19 [Source:RGD Symbol;Acc:708496]
ENSRNOT00000093558.1	603	405.903	5624.68	136.793	ENSRNOG00000019578.7	Rps16	ribosomal protein S16 [Source:RGD Symbol;Acc:621031]
ENSRNOT00000009491.6	733	535.514	7412.13	136.635	ENSRNOG00000007237.7	Id2	inhibitor of DNA binding 2 [Source:RGD Symbol;Acc:2859]
ENSRNOT00000050931.3	382	195.001	2698.83	136.624	ENSRNOG00000032232.3	Snrpg	small nuclear ribonucleoprotein polypeptide G [Source:RGD Symbol;Acc:1584713]
ENSRNOT00000010799.6	2088	1890.42	26140.7	136.505	ENSRNOG00000008193.7	Cr1l	complement C3b/C4b receptor 1 like [Source:RGD Symbol;Acc:2399]
ENSRNOT00000028725.6	633	435.676	6024	136.493	ENSRNOG00000021153.6	Fkbp2	FKBP prolyl isomerase 2 [Source:RGD Symbol;Acc:1560660]
ENSRNOT00000008940.6	1284	1086.42	15007	136.359	ENSRNOG00000006327.6	Rcc2	regulator of chromosome condensation 2 [Source:RGD Symbol;Acc:1309986]
ENSRNOT00000075425.1	1391	1193.42	16474	136.268	ENSRNOG00000048981.1	Ahsa1	activator of Hsp90 ATPase activity 1 [Source:RGD Symbol;Acc:1589285]
ENSRNOT00000021310.5	913	715.422	9857	136.01	ENSRNOG00000015865.5	Ap2s1	adaptor related protein complex 2 subunit sigma 1 [Source:RGD Symbol;Acc:620188]
ENSRNOT00000071425.2	2713	2515.42	34606	135.81	ENSRNOG00000047088.2	Rab10	RAB10, member RAS oncogene family [Source:RGD Symbol;Acc:620879]
ENSRNOT00000022341.4	1160	962.422	13235	135.753	ENSRNOG00000016587.4	Ninj1	ninjurin 1 [Source:RGD Symbol;Acc:3179]
ENSRNOT00000002533.7	1471	1273.42	17496	135.63	ENSRNOG00000001849.7	Mapk1	mitogen activated protein kinase 1 [Source:RGD Symbol;Acc:70500]
ENSRNOT00000025196.3	2054	1856.42	25497	135.582	ENSRNOG00000018487.3	Slc3a2	solute carrier family 3 member 2 [Source:RGD Symbol;Acc:3073]
ENSRNOT00000026398.5	2262	2064.42	28310	135.373	ENSRNOG00000019450.5	Etf1	eukaryotic translation termination factor 1 [Source:RGD Symbol;Acc:1305712]
ENSRNOT00000027297.5	557	360.528	4934	135.098	ENSRNOG00000020165.5	Ahsp	alpha hemoglobin stabilizing protein [Source:RGD Symbol;Acc:1306725]
ENSRNOT00000078910.1	2044	1846.42	25250	134.996	ENSRNOG00000052219.1	Gm2a	GM2 ganglioside activator [Source:RGD Symbol;Acc:628651]
ENSRNOT00000050878.4	477	282.85	3865.99	134.926	ENSRNOG00000028884.4	Atp5mg	ATP synthase membrane subunit g [Source:RGD Symbol;Acc:1303259]
ENSRNOT00000075852.1	2073	1875.42	25633	134.924	ENSRNOG00000014445.7	Hp1bp3	heterochromatin protein 1, binding protein 3 [Source:RGD Symbol;Acc:735099]
ENSRNOT00000075796.2	3555	3357.42	45803	134.672	ENSRNOG00000047656.2	Gaa	glucosidase, alpha, acid [Source:RGD Symbol;Acc:735227]
ENSRNOT00000013463.4	2262	2064.42	28136	134.541	ENSRNOG00000010034.5	Asah1	N-acylsphingosine amidohydrolase 1 [Source:RGD Symbol;Acc:621568]
ENSRNOT00000028744.6	3173	2975.42	40465	134.252	ENSRNOG00000021168.7	Anp32e	acidic nuclear phosphoprotein 32 family member E [Source:RGD Symbol;Acc:1310611]
ENSRNOT00000036910.5	4509	4311.42	58609	134.194	ENSRNOG00000018823.7	Nisch	nischarin [Source:RGD Symbol;Acc:1306950]
ENSRNOT00000083293.1	3332	3134.42	42570	134.071	ENSRNOG00000057623.1	Copb1	coatomer protein complex, subunit beta 1 [Source:RGD Symbol;Acc:620861]
ENSRNOT00000088795.1	2946	2748.42	37309.7	134.007	ENSRNOG00000056756.1	Actn1	actinin, alpha 1 [Source:RGD Symbol;Acc:70907]
ENSRNOT00000007711.5	1567	1369.42	18575	133.9	ENSRNOG00000005841.6	Erp44	endoplasmic reticulum protein 44 [Source:RGD Symbol;Acc:1309176]
ENSRNOT00000019234.4	615	417.804	5666.98	133.896	ENSRNOG00000014130.4	Cks2	CDC28 protein kinase regulatory subunit 2 [Source:RGD Symbol;Acc:1562047]
ENSRNOT00000007698.6	1241	1043.42	14129	133.672	ENSRNOG00000005615.6	Gadd45a	growth arrest and DNA-damage-inducible, alpha [Source:RGD Symbol;Acc:2654]
ENSRNOT00000065270.2	2340	2142.42	28931	133.305	ENSRNOG00000036835.4	Copz1	coatomer protein complex, subunit zeta 1 [Source:RGD Symbol;Acc:1306154]
ENSRNOT00000048923.4	1157	959.422	12953.3	133.279	ENSRNOG00000029549.4	Eci3	enoyl-Coenzyme A delta isomerase 3 [Source:RGD Symbol;Acc:1310224]
ENSRNOT00000024656.3	729	531.514	7155	132.888	ENSRNOG00000018207.4	Dynlt1	dynein light chain Tctex-type 1 [Source:RGD Symbol;Acc:620261]
ENSRNOT00000056704.3	3672	3474.42	46749.6	132.827	ENSRNOG00000030183.5	Plod2	procollagen lysine, 2-oxoglutarate 5-dioxygenase 2 [Source:RGD Symbol;Acc:3353]
ENSRNOT00000080410.1	2497	2299.42	30913.3	132.714	ENSRNOG00000015514.7	Bcat1	branched chain amino acid transaminase 1 [Source:RGD Symbol;Acc:2195]
ENSRNOT00000090875.1	1578	1380.42	18501.6	132.308	ENSRNOG00000013195.6	Ruvbl1	RuvB-like AAA ATPase 1 [Source:RGD Symbol;Acc:68373]
ENSRNOT00000073020.2	258	94.4463	1265	132.219	ENSRNOG00000049032.2	AABR07029573.1
ENSRNOT00000019497.6	2163	1965.42	26293.2	132.062	ENSRNOG00000014399.6	Aamp	angio-associated, migratory cell protein [Source:RGD Symbol;Acc:1306281]
ENSRNOT00000080720.1	210	61.9765	828.62	131.983	ENSRNOG00000060998.1	AABR07029467.2
ENSRNOT00000021221.4	929	731.422	9766.76	131.817	ENSRNOG00000015844.4	Snrpd2	small nuclear ribonucleoprotein D2 polypeptide [Source:RGD Symbol;Acc:1593018]
ENSRNOT00000029177.4	1879	1681.42	22436.2	131.723	ENSRNOG00000021492.4	Rbbp4	RB binding protein 4, chromatin remodeling factor [Source:RGD Symbol;Acc:1593768]
ENSRNOT00000002732.6	823	625.422	8331	131.496	ENSRNOG00000001991.7	Atp5po	ATP synthase peripheral stalk subunit OSCP [Source:RGD Symbol;Acc:621379]
ENSRNOT00000056199.2	1454	1256.42	16699	131.203	ENSRNOG00000020667.7	Shisa5	shisa family member 5 [Source:RGD Symbol;Acc:1359661]
ENSRNOT00000028411.3	3809	3611.42	47940.8	131.044	ENSRNOG00000020918.5	Ccnd1	cyclin D1 [Source:RGD Symbol;Acc:68384]
ENSRNOT00000082107.1	3270	3072.42	40772	131	ENSRNOG00000060753.1	Esyt1	extended synaptotagmin 1 [Source:RGD Symbol;Acc:3053]
ENSRNOT00000025767.6	588	391.087	5185.98	130.902	ENSRNOG00000018881.6	Rnasek	ribonuclease K [Source:RGD Symbol;Acc:1305687]
ENSRNOT00000086847.1	1479	1281.42	16987.7	130.868	ENSRNOG00000056585.1	Fscn1	fascin actin-bundling protein 1 [Source:RGD Symbol;Acc:1583309]
ENSRNOT00000028743.7	2101	1903.42	25225	130.823	ENSRNOG00000021164.7	Stip1	stress-induced phosphoprotein 1 [Source:RGD Symbol;Acc:621599]
ENSRNOT00000012376.4	5669	5471.42	72394	130.615	ENSRNOG00000009275.4	Kpnb1	karyopherin subunit beta 1 [Source:RGD Symbol;Acc:2909]
ENSRNOT00000014044.6	1116	918.422	12136	130.444	ENSRNOG00000010298.6	Xbp1	X-box binding protein 1 [Source:RGD Symbol;Acc:1303073]
ENSRNOT00000002599.6	1802	1604.42	21200.1	130.439	ENSRNOG00000001893.6	LOC100362453	serine/threonine-protein phosphatase 2A catalytic subunit alpha-like [Source:RGD Symbol;Acc:2318135]
ENSRNOT00000015085.6	1260	1062.42	14002.7	130.108	ENSRNOG00000039980.4	Slc25a5	solute carrier family 25 member 5 [Source:RGD Symbol;Acc:620353]
ENSRNOT00000028100.7	3746	3548.42	46747	130.049	ENSRNOG00000020683.7	Hnrnpul1	heterogeneous nuclear ribonucleoprotein U-like 1 [Source:RGD Symbol;Acc:1307456]
ENSRNOT00000015218.6	1201	1003.42	13200	129.861	ENSRNOG00000011029.6	Sec11a	SEC11 homolog A, signal peptidase complex subunit [Source:RGD Symbol;Acc:69360]
ENSRNOT00000005126.6	3007	2809.42	36930	129.763	ENSRNOG00000003844.6	Dhx15	DEAH-box helicase 15 [Source:RGD Symbol;Acc:1308072]
ENSRNOT00000054980.3	1963	1765.42	23202	129.738	ENSRNOG00000019965.6	Tgfb1i1	transforming growth factor beta 1 induced transcript 1 [Source:RGD Symbol;Acc:620173]
ENSRNOT00000012996.6	2427	2229.42	29280	129.649	ENSRNOG00000009625.6	Dpysl2	dihydropyrimidinase-like 2 [Source:RGD Symbol;Acc:2517]
ENSRNOT00000003658.2	736	538.503	7070	129.605	ENSRNOG00000002693.2	Nme1	NME/NM23 nucleoside diphosphate kinase 1 [Source:RGD Symbol;Acc:70497]
ENSRNOT00000022255.3	2366	2168.42	28402	129.299	ENSRNOG00000016299.3	Klf4	Kruppel like factor 4 [Source:RGD Symbol;Acc:621445]
ENSRNOT00000014798.5	3199	3001.42	39261.6	129.131	ENSRNOG00000009820.5	Bnip3l	BCL2 interacting protein 3 like [Source:RGD Symbol;Acc:621354]
ENSRNOT00000013841.3	753	555.492	7266	129.124	ENSRNOG00000010420.3	Sem1	SEM1, 26S proteasome complex subunit [Source:RGD Symbol;Acc:1590628]
ENSRNOT00000078775.1	336	155.494	2029.51	128.845	ENSRNOG00000055634.1	AABR07024908.1
ENSRNOT00000027360.5	3674	3476.42	45373	128.841	ENSRNOG00000020182.5	Mvp	major vault protein [Source:RGD Symbol;Acc:70932]
ENSRNOT00000003158.6	1553	1355.42	17679	128.758	ENSRNOG00000002292.8	Hnrnpd	heterogeneous nuclear ribonucleoprotein D [Source:RGD Symbol;Acc:620365]
ENSRNOT00000007554.4	988	790.422	10307	128.725	ENSRNOG00000005331.4	Vapb	VAMP associated protein B and C [Source:RGD Symbol;Acc:68326]
ENSRNOT00000085397.1	534	337.997	4406	128.683	ENSRNOG00000057147.1	Praf2	PRA1 domain family, member 2 [Source:RGD Symbol;Acc:1566287]
ENSRNOT00000072429.2	2682	2484.42	32355	128.56	ENSRNOG00000046891.2	Hk1	hexokinase 1 [Source:RGD Symbol;Acc:2796]
ENSRNOT00000077799.1	927	729.422	9477.13	128.259	ENSRNOG00000013930.7	Rnf4	ring finger protein 4 [Source:RGD Symbol;Acc:3583]
ENSRNOT00000039997.4	604	406.903	5285	128.216	ENSRNOG00000028411.6	Pcnp	PEST proteolytic signal containing nuclear protein [Source:RGD Symbol;Acc:1563775]
ENSRNOT00000076548.2	1700	1502.42	19488	128.046	ENSRNOG00000009878.7	Crtapl1	cartilage associated protein-like 1 [Source:RGD Symbol;Acc:1565180]
ENSRNOT00000066947.3	5125	4927.42	63887	127.992	ENSRNOG00000010117.7	Eif3a	eukaryotic translation initiation factor 3, subunit A [Source:RGD Symbol;Acc:1307269]
ENSRNOT00000024413.6	1074	876.422	11362	127.977	ENSRNOG00000017949.6	Mvb12a	multivesicular body subunit 12A [Source:RGD Symbol;Acc:735220]
ENSRNOT00000089874.1	1487	1289.42	16710	127.93	ENSRNOG00000058053.1	Ube2n	ubiquitin-conjugating enzyme E2N [Source:RGD Symbol;Acc:621096]
ENSRNOT00000027118.6	3797	3599.42	46640.5	127.914	ENSRNOG00000020020.6	Wbp1l	WW domain binding protein 1-like [Source:RGD Symbol;Acc:1305793]
ENSRNOT00000010386.7	1457	1259.42	16309	127.834	ENSRNOG00000007788.7	Glod4	glyoxalase domain containing 4 [Source:RGD Symbol;Acc:1307010]
ENSRNOT00000045153.3	1223	1025.42	13267	127.72	ENSRNOG00000031367.4	Hprt1	hypoxanthine phosphoribosyltransferase 1 [Source:RGD Symbol;Acc:2826]
ENSRNOT00000011183.4	849	651.422	8428	127.718	ENSRNOG00000008329.4	Ndufb11	NADH:ubiquinone oxidoreductase subunit B11 [Source:RGD Symbol;Acc:1563698]
ENSRNOT00000031115.4	3602	3404.42	44017.9	127.637	ENSRNOG00000019164.7	Uba1	ubiquitin-like modifier activating enzyme 1 [Source:RGD Symbol;Acc:1359327]
ENSRNOT00000072795.2	466	272.41	3521.72	127.621	ENSRNOG00000060344.1	AABR07073045.1	40S ribosomal protein S25-like [Source:NCBI gene;Acc:100911371]
ENSRNOT00000003586.5	1526	1328.42	17168.8	127.583	ENSRNOG00000002572.5	Cacybp	calcyclin binding protein [Source:RGD Symbol;Acc:1303146]
ENSRNOT00000067376.3	795	597.458	7719	127.539	ENSRNOG00000008613.7	Gatad1	GATA zinc finger domain containing 1 [Source:RGD Symbol;Acc:1562004]
ENSRNOT00000015177.6	2442	2244.42	28992	127.516	ENSRNOG00000010543.6	Srpra	SRP receptor subunit alpha [Source:RGD Symbol;Acc:1311504]
ENSRNOT00000068683.3	2481	2283.42	29463	127.374	ENSRNOG00000031743.5	Gbp2	guanylate binding protein 2 [Source:RGD Symbol;Acc:621810]
ENSRNOT00000004941.4	2802	2604.42	33584	127.295	ENSRNOG00000003524.4	Lrrc59	leucine rich repeat containing 59 [Source:RGD Symbol;Acc:1305092]
ENSRNOT00000085214.1	4801	4603.42	59354.4	127.28	ENSRNOG00000002393.7	Eprs	glutamyl-prolyl-tRNA synthetase [Source:RGD Symbol;Acc:1310952]
ENSRNOT00000016220.6	2288	2090.42	26936.5	127.203	ENSRNOG00000011798.6	Mapre1	microtubule-associated protein, RP/EB family, member 1 [Source:RGD Symbol;Acc:621781]
ENSRNOT00000013243.5	2059	1861.42	23979.9	127.172	ENSRNOG00000009850.5	St3gal4	ST3 beta-galactoside alpha-2,3-sialyltransferase 4 [Source:RGD Symbol;Acc:1303068]
ENSRNOT00000084069.1	870	672.422	8661.07	127.151	ENSRNOG00000005668.7	Ndufa8	NADH:ubiquinone oxidoreductase subunit A8 [Source:RGD Symbol;Acc:1306283]
ENSRNOT00000064452.2	2577	2379.42	30645	127.139	ENSRNOG00000007284.7	Slc2a1	solute carrier family 2 member 1 [Source:RGD Symbol;Acc:3704]
ENSRNOT00000085981.1	971	773.422	9956.83	127.085	ENSRNOG00000011732.7	Psmb7	proteasome 20S subunit beta 7 [Source:RGD Symbol;Acc:621093]
ENSRNOT00000039400.5	237	79.9127	1028	126.989	ENSRNOG00000024813.5	Mzt1	mitotic spindle organizing protein 1 [Source:RGD Symbol;Acc:1592140]
ENSRNOT00000084031.1	4210	4012.42	51560.1	126.852	ENSRNOG00000014863.7	Reck	reversion-inducing-cysteine-rich protein with kazal motifs [Source:RGD Symbol;Acc:1308845]
ENSRNOT00000028787.8	2021	1823.42	23430	126.845	ENSRNOG00000021203.8	Atl3	atlastin GTPase 3 [Source:RGD Symbol;Acc:1309871]
ENSRNOT00000005909.6	1165	967.422	12400	126.531	ENSRNOG00000004411.6	Tspan8	tetraspanin 8 [Source:RGD Symbol;Acc:621783]
ENSRNOT00000010127.5	1335	1137.42	14574	126.487	ENSRNOG00000007613.5	C1qtnf5	C1q and TNF related 5 [Source:RGD Symbol;Acc:1308802]
ENSRNOT00000005127.6	2159	1961.42	25046	126.054	ENSRNOG00000003743.7	Dars	aspartyl-tRNA synthetase [Source:RGD Symbol;Acc:621167]
ENSRNOT00000083528.1	7074	6876.42	87744.8	125.965	ENSRNOG00000005434.7	Sptbn1	spectrin, beta, non-erythrocytic 1 [Source:RGD Symbol;Acc:727922]
ENSRNOT00000002746.6	2070	1872.42	23891	125.956	ENSRNOG00000002004.7	Prdm8	PR/SET domain 8 [Source:RGD Symbol;Acc:1311628]
ENSRNOT00000071737.2	1075	877.422	11173	125.705	ENSRNOG00000050578.2	Rheb	Ras homolog, mTORC1 binding [Source:RGD Symbol;Acc:621840]
ENSRNOT00000039551.6	4363	4165.42	53007.1	125.622	ENSRNOG00000023383.6	Ddx3x	DEAD-box helicase 3, X-linked [Source:RGD Symbol;Acc:1564771]
ENSRNOT00000021858.2	2886	2688.42	34200.7	125.582	ENSRNOG00000016244.6	Mical2	microtubule associated monooxygenase, calponin and LIM domain containing 2 [Source:RGD Symbol;Acc:1311773]
ENSRNOT00000042144.4	2315	2117.42	26928.5	125.543	ENSRNOG00000033663.5	P4ha2	prolyl 4-hydroxylase subunit alpha 2 [Source:RGD Symbol;Acc:1309673]
ENSRNOT00000013400.6	2743	2545.42	32371.3	125.542	ENSRNOG00000009781.8	Dync1i2	dynein cytoplasmic 1 intermediate chain 2 [Source:RGD Symbol;Acc:620174]
ENSRNOT00000020322.5	2079	1881.42	23882	125.307	ENSRNOG00000015020.7	Idh1	isocitrate dehydrogenase (NADP(+)) 1 [Source:RGD Symbol;Acc:2862]
ENSRNOT00000074177.2	1688	1490.42	18902	125.195	ENSRNOG00000046905.2	Sgce	sarcoglycan, epsilon [Source:RGD Symbol;Acc:1303201]
ENSRNOT00000026416.6	2554	2356.42	29878	125.166	ENSRNOG00000019507.6	Hnrnpul2	heterogeneous nuclear ribonucleoprotein U-like 2 [Source:RGD Symbol;Acc:1562784]
ENSRNOT00000067542.3	2828	2630.42	33329	125.08	ENSRNOG00000008830.7	Nfe2l1	nuclear factor, erythroid 2-like 1 [Source:RGD Symbol;Acc:1311972]
ENSRNOT00000017254.6	1277	1079.42	13631.2	124.661	ENSRNOG00000012630.6	Rhoc	ras homolog family member C [Source:RGD Symbol;Acc:1304965]
ENSRNOT00000073271.1	1152	954.422	12025	124.375	ENSRNOG00000050485.1	Gas1	growth arrest-specific 1 [Source:RGD Symbol;Acc:1586820]
ENSRNOT00000026949.5	3760	3562.42	44853.7	124.292	ENSRNOG00000019875.6	Matr3	matrin 3 [Source:RGD Symbol;Acc:3052]
ENSRNOT00000061332.5	2991	2793.42	35170.3	124.288	ENSRNOG00000012346.8	Epb41l2	erythrocyte membrane protein band 4.1-like 2 [Source:RGD Symbol;Acc:1563977]
ENSRNOT00000013933.6	2004	1806.42	22732.3	124.227	ENSRNOG00000010176.6	Map2k1	mitogen activated protein kinase kinase 1 [Source:RGD Symbol;Acc:70495]
ENSRNOT00000003447.3	3264	3066.42	38581	124.203	ENSRNOG00000002488.3	Galnt10	polypeptide N-acetylgalactosaminyltransferase 10 [Source:RGD Symbol;Acc:69409]
ENSRNOT00000079709.1	912	714.422	8971.02	123.959	ENSRNOG00000058658.1	Mtch2	mitochondrial carrier 2 [Source:RGD Symbol;Acc:1308080]
ENSRNOT00000005258.4	1483	1285.42	16135	123.912	ENSRNOG00000003923.4	Rab21	RAB21, member RAS oncogene family [Source:RGD Symbol;Acc:1303150]
ENSRNOT00000041106.5	3419	3221.42	40429	123.89	ENSRNOG00000029028.5	Mknk2	MAPK interacting serine/threonine kinase 2 [Source:RGD Symbol;Acc:1305728]
ENSRNOT00000045415.2	3361	3163.42	39660.7	123.764	ENSRNOG00000031368.2	LOC499235	LRRGT00141 [Source:RGD Symbol;Acc:1565730]
ENSRNOT00000012287.6	2067	1869.42	23426	123.703	ENSRNOG00000008744.6	Cops2	COP9 signalosome subunit 2 [Source:RGD Symbol;Acc:628791]
ENSRNOT00000022400.5	8647	8449.42	105864	123.683	ENSRNOG00000016630.6	Tln1	talin 1 [Source:RGD Symbol;Acc:1306247]
ENSRNOT00000009448.3	835	637.422	7986	123.678	ENSRNOG00000007159.3	Ccl2	C-C motif chemokine ligand 2 [Source:RGD Symbol;Acc:3645]
ENSRNOT00000036172.6	2190	1992.42	24959.8	123.666	ENSRNOG00000007921.8	Hnrnpm	heterogeneous nuclear ribonucleoprotein M [Source:RGD Symbol;Acc:620369]
ENSRNOT00000064288.3	1480	1282.42	16054.4	123.581	ENSRNOG00000037765.4	Lims1	LIM zinc finger domain containing 1 [Source:RGD Symbol;Acc:1560732]
ENSRNOT00000057752.3	1870	1672.42	20923	123.5	ENSRNOG00000000569.6	Vsir	V-set immunoregulatory receptor [Source:RGD Symbol;Acc:1590938]
ENSRNOT00000089309.1	2673	2475.42	30944	123.4	ENSRNOG00000058805.1	Aida	axin interactor, dorsalization associated [Source:RGD Symbol;Acc:1592746]
ENSRNOT00000068185.3	1500	1302.42	16210.2	122.865	ENSRNOG00000005480.8	Ybx3	Y box binding protein 3 [Source:RGD Symbol;Acc:621056]
ENSRNOT00000082792.1	6709	6511.42	80941.2	122.711	ENSRNOG00000012094.6	Ltbp2	latent transforming growth factor beta binding protein 2 [Source:RGD Symbol;Acc:68380]
ENSRNOT00000026964.7	2671	2473.42	30721.8	122.613	ENSRNOG00000019848.7	Rbm39	RNA binding motif protein 39 [Source:RGD Symbol;Acc:1310071]
ENSRNOT00000091048.1	591	394.079	4890.79	122.514	ENSRNOG00000049056.2	AABR07051450.1
ENSRNOT00000004046.6	2204	2006.42	24890	122.459	ENSRNOG00000002989.6	Nmt1	N-myristoyltransferase 1 [Source:RGD Symbol;Acc:628642]
ENSRNOT00000039275.3	1773	1575.42	19539	122.432	ENSRNOG00000022392.3	Hspb8	heat shock protein family B (small) member 8 [Source:RGD Symbol;Acc:71003]
ENSRNOT00000080342.1	2376	2178.42	26989.5	122.304	ENSRNOG00000018529.7	Csnk1g2	casein kinase 1, gamma 2 [Source:RGD Symbol;Acc:621407]
ENSRNOT00000020323.3	763	565.481	7003.19	122.255	ENSRNOG00000015131.6	Ube2c	ubiquitin-conjugating enzyme E2C [Source:RGD Symbol;Acc:1305382]
ENSRNOT00000016060.5	711	513.524	6359	122.241	ENSRNOG00000011825.5	Ndufb3	NADH:ubiquinone oxidoreductase subunit B3 [Source:RGD Symbol;Acc:1310737]
ENSRNOT00000027580.4	1722	1524.42	18860.6	122.135	ENSRNOG00000020358.4	Ptov1	PTOV1, extended AT-hook containing adaptor protein [Source:RGD Symbol;Acc:1306977]
ENSRNOT00000013759.5	1154	956.422	11832	122.123	ENSRNOG00000010332.6	Nipsnap3b	nipsnap homolog 3B [Source:RGD Symbol;Acc:1359688]
ENSRNOT00000046399.6	2546	2348.42	29041	122.075	ENSRNOG00000015177.8	Sun2	Sad1 and UNC84 domain containing 2 [Source:RGD Symbol;Acc:1563141]
ENSRNOT00000013979.5	1062	864.422	10687	122.045	ENSRNOG00000010461.5	Gpx8	glutathione peroxidase 8 [Source:RGD Symbol;Acc:1307506]
ENSRNOT00000020337.4	4233	4035.42	49879	122.016	ENSRNOG00000028504.3	Socs5	suppressor of cytokine signaling 5 [Source:RGD Symbol;Acc:1564914]
ENSRNOT00000007300.5	1934	1736.42	21446	121.922	ENSRNOG00000005249.5	Snx6	sorting nexin 6 [Source:RGD Symbol;Acc:1304647]
ENSRNOT00000019121.4	3231	3033.42	37446	121.86	ENSRNOG00000014258.4	Rab32	RAB32, member RAS oncogene family [Source:RGD Symbol;Acc:1559997]
ENSRNOT00000002116.4	909	711.422	8772.87	121.732	ENSRNOG00000001551.4	Atp5pf	ATP synthase peripheral stalk subunit F6 [Source:RGD Symbol;Acc:621376]
ENSRNOT00000064251.3	3751	3553.42	43776	121.613	ENSRNOG00000042668.3	Msrb3	methionine sulfoxide reductase B3 [Source:RGD Symbol;Acc:1596851]
ENSRNOT00000049255.3	1019	821.422	10119	121.607	ENSRNOG00000000340.7	Rtraf	RNA transcription, translation and transport factor [Source:RGD Symbol;Acc:1304704]
ENSRNOT00000056169.3	1104	906.422	11163	121.574	ENSRNOG00000013577.7	Kdelr3	KDEL endoplasmic reticulum protein retention receptor 3 [Source:RGD Symbol;Acc:1311536]
ENSRNOT00000067883.2	1259	1061.42	13066.9	121.528	ENSRNOG00000030683.5	Vps26a	VPS26 retromer complex component A [Source:RGD Symbol;Acc:1359254]
ENSRNOT00000001792.4	1403	1205.42	14837.7	121.511	ENSRNOG00000001325.4	Il3ra	interleukin 3 receptor subunit alpha [Source:RGD Symbol;Acc:628728]
ENSRNOT00000074727.1	2144	1946.42	23930.3	121.367	ENSRNOG00000049281.1	Gba	glucosylceramidase beta [Source:RGD Symbol;Acc:1589149]
ENSRNOT00000026792.5	2767	2569.42	31557	121.241	ENSRNOG00000019725.5	Actr1a	actin related protein 1A [Source:RGD Symbol;Acc:1307025]
ENSRNOT00000059541.2	422	231.186	2838	121.182	ENSRNOG00000038951.2	Cox17	cytochrome c oxidase copper chaperone COX17 [Source:RGD Symbol;Acc:620548]
ENSRNOT00000092125.1	3851	3653.42	44828.7	121.128	ENSRNOG00000014610.5	Anpep	alanyl aminopeptidase, membrane [Source:RGD Symbol;Acc:2991]
ENSRNOT00000001638.5	2571	2373.42	29082	120.959	ENSRNOG00000001223.5	Pttg1ip	PTTG1 interacting protein [Source:RGD Symbol;Acc:1305983]
ENSRNOT00000073492.2	1224	1026.42	12566	120.854	ENSRNOG00000049497.2	Eif6	eukaryotic translation initiation factor 6 [Source:RGD Symbol;Acc:1305373]
ENSRNOT00000003004.6	1594	1396.42	17095	120.849	ENSRNOG00000002210.6	Hsd17b11	hydroxysteroid (17-beta) dehydrogenase 11 [Source:RGD Symbol;Acc:1303235]
ENSRNOT00000042965.3	762	564.481	6908.73	120.82	ENSRNOG00000004621.8	Rtn4	reticulon 4 [Source:RGD Symbol;Acc:620989]
ENSRNOT00000000253.4	1750	1552.42	18975	120.66	ENSRNOG00000000236.7	Zfp207	zinc finger protein 207 [Source:RGD Symbol;Acc:1308121]
ENSRNOT00000013043.6	2562	2364.42	28857.9	120.484	ENSRNOG00000009754.6	Nampt	nicotinamide phosphoribosyltransferase [Source:RGD Symbol;Acc:631365]
ENSRNOT00000080288.1	3901	3703.42	45187	120.448	ENSRNOG00000053239.1	Clmp	CXADR-like membrane protein [Source:RGD Symbol;Acc:708569]
ENSRNOT00000033288.6	1513	1315.42	16046	120.418	ENSRNOG00000027175.6	Cnpy4	canopy FGF signaling regulator 4 [Source:RGD Symbol;Acc:1307636]
ENSRNOT00000019555.6	585	388.118	4732.87	120.379	ENSRNOG00000013930.7	Rnf4	ring finger protein 4 [Source:RGD Symbol;Acc:3583]
ENSRNOT00000047043.4	312	135.876	1655.76	120.294	ENSRNOG00000040101.3	AABR07026805.2
ENSRNOT00000065593.3	1596	1398.42	17028.7	120.208	ENSRNOG00000031993.5	Prim1	DNA primase subunit 1 [Source:RGD Symbol;Acc:621380]
ENSRNOT00000001918.6	1344	1146.42	13957	120.181	ENSRNOG00000001415.6	Ap1s1	adaptor related protein complex 1 subunit sigma 1 [Source:RGD Symbol;Acc:1305911]
ENSRNOT00000007977.5	3479	3281.42	39931	120.126	ENSRNOG00000006076.5	Steap2	STEAP2 metalloreductase [Source:RGD Symbol;Acc:1307050]
ENSRNOT00000013632.5	2825	2627.42	31967.1	120.106	ENSRNOG00000010196.5	Glb1	galactosidase, beta 1 [Source:RGD Symbol;Acc:1597145]
ENSRNOT00000014508.3	2575	2377.42	28867	119.863	ENSRNOG00000010557.3	Smarcd2	SWI/SNF related, matrix associated, actin dependent regulator of chromatin, subfamily d, member 2 [Source:RGD Symbol;Acc:69289]
ENSRNOT00000015956.6	2358	2160.42	26200	119.716	ENSRNOG00000011782.6	Got2	glutamic-oxaloacetic transaminase 2 [Source:RGD Symbol;Acc:2722]
ENSRNOT00000084552.1	2466	2268.42	27484.6	119.607	ENSRNOG00000003206.7	Actr3	actin related protein 3 [Source:RGD Symbol;Acc:71024]
ENSRNOT00000017532.5	2928	2730.42	33074	119.577	ENSRNOG00000013057.6	Prc1	protein regulator of cytokinesis 1 [Source:RGD Symbol;Acc:1311754]
ENSRNOT00000075674.2	1711	1513.42	18330.9	119.568	ENSRNOG00000047287.2	Nucks1	nuclear casein kinase and cyclin-dependent kinase substrate 1 [Source:RGD Symbol;Acc:620993]
ENSRNOT00000013695.7	3505	3307.42	40052.9	119.546	ENSRNOG00000010218.7	Eif5	eukaryotic translation initiation factor 5 [Source:RGD Symbol;Acc:619861]
ENSRNOT00000003473.6	549	352.692	4266	119.403	ENSRNOG00000002575.6	Sap30l	SAP30-like [Source:RGD Symbol;Acc:1309585]
ENSRNOT00000010481.6	2754	2556.42	30912.7	119.37	ENSRNOG00000007892.6	Tram1	translocation associated membrane protein 1 [Source:RGD Symbol;Acc:1359100]
ENSRNOT00000093598.1	819	621.422	7507.71	119.264	ENSRNOG00000051382.2	Ntan1	N-terminal asparagine amidase [Source:RGD Symbol;Acc:1305160]
ENSRNOT00000023977.6	1698	1500.42	18120.5	119.219	ENSRNOG00000017819.6	Cd14	CD14 molecule [Source:RGD Symbol;Acc:620588]
ENSRNOT00000026760.4	4428	4230.42	51090	119.218	ENSRNOG00000019742.5	Stat3	signal transducer and activator of transcription 3 [Source:RGD Symbol;Acc:3772]
ENSRNOT00000007558.5	1672	1474.42	17799	119.169	ENSRNOG00000005276.6	Csnk2a1	casein kinase 2 alpha 1 [Source:RGD Symbol;Acc:621663]
ENSRNOT00000072378.2	2773	2575.42	31053.1	119.027	ENSRNOG00000046533.2	AABR07043421.1	cold shock domain-containing protein E1-like [Source:NCBI gene;Acc:100364335]
ENSRNOT00000026989.4	1358	1160.42	13984	118.961	ENSRNOG00000019934.4	Paip2	poly(A) binding protein interacting protein 2 [Source:RGD Symbol;Acc:1359176]
ENSRNOT00000004308.6	702	504.524	6079.68	118.957	ENSRNOG00000003147.8	Sqstm1	sequestosome 1 [Source:RGD Symbol;Acc:69287]
ENSRNOT00000013831.6	2950	2752.42	33162.8	118.939	ENSRNOG00000010153.6	Raf1	Raf-1 proto-oncogene, serine/threonine kinase [Source:RGD Symbol;Acc:3531]
ENSRNOT00000008964.4	898	700.422	8436	118.896	ENSRNOG00000006500.6	Snf8	SNF8 subunit of ESCRT-II [Source:RGD Symbol;Acc:1310144]
ENSRNOT00000014780.6	2368	2170.42	26140	118.892	ENSRNOG00000011052.6	Gars	glycyl-tRNA synthetase [Source:RGD Symbol;Acc:1307856]
ENSRNOT00000078806.1	3005	2807.42	33801.6	118.855	ENSRNOG00000014333.6	Vcam1	vascular cell adhesion molecule 1 [Source:RGD Symbol;Acc:3952]
ENSRNOT00000032047.5	1743	1545.42	18595.6	118.783	ENSRNOG00000024470.5	Lman1	lectin, mannose-binding, 1 [Source:RGD Symbol;Acc:71020]
ENSRNOT00000037809.4	3430	3232.42	38844	118.628	ENSRNOG00000024886.4	Ext1	exostosin glycosyltransferase 1 [Source:RGD Symbol;Acc:1587375]
ENSRNOT00000018073.7	3800	3602.42	43289.7	118.626	ENSRNOG00000013039.8	Add1	adducin 1 [Source:RGD Symbol;Acc:2041]
ENSRNOT00000008893.7	2165	1967.42	23620.9	118.519	ENSRNOG00000006221.7	Uba3	ubiquitin-like modifier activating enzyme 3 [Source:RGD Symbol;Acc:621084]
ENSRNOT00000086591.1	1261	1063.42	12760	118.45	ENSRNOG00000051482.1	Hmg1l1	high-mobility group (nonhistone chromosomal) protein 1-like 1 [Source:RGD Symbol;Acc:1587112]
ENSRNOT00000004770.5	2186	1988.42	23856.9	118.439	ENSRNOG00000003289.8	Lap3	leucine aminopeptidase 3 [Source:RGD Symbol;Acc:1307985]
ENSRNOT00000019642.6	1568	1370.42	16435	118.387	ENSRNOG00000014109.6	Psmd13	proteasome 26S subunit, non-ATPase 13 [Source:RGD Symbol;Acc:1305236]
ENSRNOT00000089104.1	1774	1576.42	18902	118.365	ENSRNOG00000015059.5	Mcfd2	multiple coagulation factor deficiency 2 [Source:RGD Symbol;Acc:628690]
ENSRNOT00000019443.6	1243	1045.42	12533	118.346	ENSRNOG00000014415.6	Hsbp1	heat shock factor binding protein 1 [Source:RGD Symbol;Acc:628632]
ENSRNOT00000025952.4	767	569.47	6823.65	118.287	ENSRNOG00000018691.7	Aurkaip1	aurora kinase A interacting protein 1 [Source:RGD Symbol;Acc:1303211]
ENSRNOT00000070812.1	2304	2106.42	25237	118.272	ENSRNOG00000046996.1	Pea15	proliferation and apoptosis adaptor protein 15 [Source:RGD Symbol;Acc:1306055]
ENSRNOT00000008321.7	5645	5447.42	65241	118.228	ENSRNOG00000005678.7	Lamb1	laminin subunit beta 1 [Source:RGD Symbol;Acc:1306311]
ENSRNOT00000024447.6	876	678.422	8114	118.066	ENSRNOG00000018075.6	Spcs1	signal peptidase complex subunit 1 [Source:RGD Symbol;Acc:1309125]
ENSRNOT00000077784.1	3270	3072.42	36738.9	118.041	ENSRNOG00000057626.1	Kif1b	kinesin family member 1B [Source:RGD Symbol;Acc:621520]
ENSRNOT00000040865.6	3887	3689.42	44107.5	118.017	ENSRNOG00000003226.8	Mprip	myosin phosphatase Rho interacting protein [Source:RGD Symbol;Acc:619947]
ENSRNOT00000061526.2	315	138.365	1652.57	117.903	ENSRNOG00000040024.2	AABR07028805.1
ENSRNOT00000092741.1	555	358.578	4280.61	117.845	ENSRNOG00000011572.9	Klc1	kinesin light chain 1 [Source:RGD Symbol;Acc:621411]
ENSRNOT00000049725.3	3977	3779.42	45110.5	117.826	ENSRNOG00000008292.6	Hif1a	hypoxia inducible factor 1 subunit alpha [Source:RGD Symbol;Acc:61928]
ENSRNOT00000055102.4	2358	2160.42	25784	117.815	ENSRNOG00000004479.7	Aurka	aurora kinase A [Source:RGD Symbol;Acc:628895]
ENSRNOT00000026470.6	1679	1481.42	17662	117.693	ENSRNOG00000019568.6	Jund	JunD proto-oncogene, AP-1 transcription factor subunit [Source:RGD Symbol;Acc:2945]
ENSRNOT00000089456.1	6791	6593.42	78568.4	117.632	ENSRNOG00000016117.7	Myof	myoferlin [Source:RGD Symbol;Acc:1564216]
ENSRNOT00000074253.1	2955	2757.42	32847	117.593	ENSRNOG00000046502.1	Lonp1	lon peptidase 1, mitochondrial [Source:RGD Symbol;Acc:621598]
ENSRNOT00000034074.5	464	270.497	3217.11	117.407	ENSRNOG00000024845.5	Mrps21	mitochondrial ribosomal protein S21 [Source:RGD Symbol;Acc:1592330]
ENSRNOT00000022960.6	2028	1830.42	21768.8	117.401	ENSRNOG00000017029.6	Snx1	sorting nexin 1 [Source:RGD Symbol;Acc:68935]
ENSRNOT00000084917.1	1142	944.422	11218.5	117.262	ENSRNOG00000061216.1	Tubb5	tubulin, beta 5 class I [Source:RGD Symbol;Acc:628596]
ENSRNOT00000084913.1	696	498.535	5920.94	117.243	ENSRNOG00000030174.4	AABR07042903.1
ENSRNOT00000047078.4	354	170.613	2025.41	117.19	ENSRNOG00000051416.1	AABR07071000.1
ENSRNOT00000061432.4	2337	2139.42	25327	116.863	ENSRNOG00000039976.4	Ptk7	protein tyrosine kinase 7 [Source:RGD Symbol;Acc:1310472]
ENSRNOT00000005794.6	381	194.139	2297.52	116.825	ENSRNOG00000004316.6	Llph	LLP homolog, long-term synaptic facilitation factor [Source:RGD Symbol;Acc:1308261]
ENSRNOT00000049812.3	2737	2539.42	30051.7	116.822	ENSRNOG00000021202.8	Rtn3	reticulon 3 [Source:RGD Symbol;Acc:620988]
ENSRNOT00000026799.5	1647	1449.42	17150	116.804	ENSRNOG00000019772.5	Dnpep	aspartyl aminopeptidase [Source:RGD Symbol;Acc:1583848]
ENSRNOT00000088442.1	2097	1899.42	22426.5	116.555	ENSRNOG00000051480.1	Fxr1	FMR1 autosomal homolog 1 [Source:RGD Symbol;Acc:1311733]
ENSRNOT00000044081.5	2431	2233.42	26367.6	116.544	ENSRNOG00000006997.8	App	amyloid beta precursor protein [Source:RGD Symbol;Acc:2139]
ENSRNOT00000017600.6	4081	3883.42	45794.9	116.41	ENSRNOG00000012820.8	Add3	adducin 3 [Source:RGD Symbol;Acc:2043]
ENSRNOT00000021868.7	1813	1615.42	19029	116.284	ENSRNOG00000016315.7	Cnpy3	canopy FGF signaling regulator 3 [Source:RGD Symbol;Acc:1597709]
ENSRNOT00000007414.3	1837	1639.42	19306	116.25	ENSRNOG00000005096.5	Bzw2	basic leucine zipper and W2 domains 2 [Source:RGD Symbol;Acc:621507]
ENSRNOT00000020364.6	2276	2078.42	24475.1	116.247	ENSRNOG00000014992.6	M6pr	mannose-6-phosphate receptor, cation dependent [Source:RGD Symbol;Acc:1359355]
ENSRNOT00000029456.5	2017	1819.42	21397	116.094	ENSRNOG00000021638.6	Eef1d	eukaryotic translation elongation factor 1 delta [Source:RGD Symbol;Acc:621174]
ENSRNOT00000038649.6	2948	2750.42	32322	116.008	ENSRNOG00000024629.6	Hadha	hydroxyacyl-CoA dehydrogenase trifunctional multienzyme complex subunit alpha [Source:RGD Symbol;Acc:620512]
ENSRNOT00000064090.2	363	178.312	2094	115.927	ENSRNOG00000020427.7	Borcs8	BLOC-1 related complex subunit 8 [Source:RGD Symbol;Acc:1582941]
ENSRNOT00000024264.8	2605	2407.42	28186.4	115.578	ENSRNOG00000017852.8	Nars1	asparaginyl-tRNA synthetase 1 [Source:RGD Symbol;Acc:1307238]
ENSRNOT00000044346.5	1664	1466.42	17155.9	115.49	ENSRNOG00000017106.6	Csnk1a1	casein kinase 1, alpha 1 [Source:RGD Symbol;Acc:71098]
ENSRNOT00000000886.4	3412	3214.42	37595	115.456	ENSRNOG00000000697.4	Coro1c	coronin 1C [Source:RGD Symbol;Acc:1564490]
ENSRNOT00000010914.4	1454	1256.42	14689.6	115.416	ENSRNOG00000008247.6	Ikbip	IKBKB interacting protein [Source:RGD Symbol;Acc:1305457]
ENSRNOT00000011373.3	552	355.628	4155.2	115.341	ENSRNOG00000008605.4	Ost4	oligosaccharyltransferase complex subunit 4, non-catalytic [Source:RGD Symbol;Acc:2300150]
ENSRNOT00000023495.4	844	646.422	7545.46	115.228	ENSRNOG00000017144.4	Mea1	male-enhanced antigen 1 [Source:RGD Symbol;Acc:1597751]
ENSRNOT00000034188.4	1107	909.422	10611	115.181	ENSRNOG00000023214.4	Il20rb	interleukin 20 receptor subunit beta [Source:RGD Symbol;Acc:1566151]
ENSRNOT00000019994.5	712	514.524	5994	115.001	ENSRNOG00000014908.5	Sf3b5	splicing factor 3b, subunit 5 [Source:RGD Symbol;Acc:1586993]
ENSRNOT00000072845.1	1275	1077.42	12542.1	114.914	ENSRNOG00000046314.1	AABR07044473.1
ENSRNOT00000082011.1	1275	1077.42	12542.1	114.914	ENSRNOG00000055972.1	AC128394.1
ENSRNOT00000075406.1	1275	1077.42	12542.1	114.914	ENSRNOG00000050867.1	AABR07050530.1
ENSRNOT00000073903.1	1275	1077.42	12542.1	114.914	ENSRNOG00000047509.1	AABR07047844.1
ENSRNOT00000074538.1	1275	1077.42	12542.1	114.914	ENSRNOG00000048192.1	AABR07070238.3
ENSRNOT00000006582.7	2538	2340.42	27231	114.857	ENSRNOG00000032391.5	Esyt2	extended synaptotagmin 2 [Source:RGD Symbol;Acc:1565705]
ENSRNOT00000019465.7	4085	3887.42	45206.5	114.797	ENSRNOG00000014079.7	Stat1	signal transducer and activator of transcription 1 [Source:RGD Symbol;Acc:3771]
ENSRNOT00000070920.2	2017	1819.42	21148.7	114.746	ENSRNOG00000045605.2	Uxs1	UDP-glucuronate decarboxylase 1 [Source:RGD Symbol;Acc:628680]
ENSRNOT00000073104.2	1311	1113.42	12897.3	114.348	ENSRNOG00000045790.2	Fam50a	family with sequence similarity 50, member A [Source:RGD Symbol;Acc:1560964]
ENSRNOT00000005961.5	2539	2341.42	27116	114.324	ENSRNOG00000004481.5	Adss	adenylosuccinate synthase [Source:RGD Symbol;Acc:1310508]
ENSRNOT00000090989.1	2697	2499.42	28918.3	114.215	ENSRNOG00000047374.2	Gnas	GNAS complex locus [Source:RGD Symbol;Acc:2716]
ENSRNOT00000013570.6	3561	3363.42	38843	114.004	ENSRNOG00000009977.6	Thrap3	thyroid hormone receptor associated protein 3 [Source:RGD Symbol;Acc:1306129]
ENSRNOT00000064114.3	1524	1326.42	15311	113.949	ENSRNOG00000019428.7	Higd1a	HIG1 hypoxia inducible domain family, member 1A [Source:RGD Symbol;Acc:620215]
ENSRNOT00000015233.4	2330	2132.42	24614.1	113.946	ENSRNOG00000011168.5	Micu2	mitochondrial calcium uptake 2 [Source:RGD Symbol;Acc:619739]
ENSRNOT00000085576.1	888	690.422	7964.09	113.87	ENSRNOG00000060329.1	Emb	embigin [Source:RGD Symbol;Acc:621067]
ENSRNOT00000010271.6	1610	1412.42	16273	113.735	ENSRNOG00000007793.6	Pnrc1	proline-rich nuclear receptor coactivator 1 [Source:RGD Symbol;Acc:628753]
ENSRNOT00000014058.7	1200	1002.42	11531.1	113.556	ENSRNOG00000010452.7	Cycs	cytochrome c, somatic [Source:RGD Symbol;Acc:2451]
ENSRNOT00000024224.4	2309	2111.42	24284	113.536	ENSRNOG00000017977.4	Smpd1	sphingomyelin phosphodiesterase 1 [Source:RGD Symbol;Acc:1549719]
ENSRNOT00000009634.6	4756	4558.42	52335	113.336	ENSRNOG00000007081.6	Xdh	xanthine dehydrogenase [Source:RGD Symbol;Acc:62043]
ENSRNOT00000026932.5	1100	902.422	10360.7	113.336	ENSRNOG00000019811.5	LOC100362432	mitochondrial import inner membrane translocase subunit Tim23-like [Source:RGD Symbol;Acc:2318156]
ENSRNOT00000023060.5	2066	1868.42	21449.4	113.326	ENSRNOG00000017073.5	Ca9	carbonic anhydrase 9 [Source:RGD Symbol;Acc:1306426]
ENSRNOT00000015318.6	2348	2150.42	24656	113.185	ENSRNOG00000011158.6	Ppp2r2a	protein phosphatase 2, regulatory subunit B, alpha [Source:RGD Symbol;Acc:620919]
ENSRNOT00000084870.1	793	595.458	6822	113.097	ENSRNOG00000051450.1	Abracl	ABRA C-terminal like [Source:RGD Symbol;Acc:1583256]
ENSRNOT00000026021.4	1181	983.422	11265.5	113.084	ENSRNOG00000019229.4	Fbl	fibrillarin [Source:RGD Symbol;Acc:1305542]
ENSRNOT00000086491.1	4023	3825.42	43794.1	113.012	ENSRNOG00000008519.7	Dipk2a	divergent protein kinase domain 2A [Source:RGD Symbol;Acc:1309079]
ENSRNOT00000017319.5	660	462.649	5296	113.002	ENSRNOG00000012722.5	Ppdpf	pancreatic progenitor cell differentiation and proliferation factor [Source:RGD Symbol;Acc:1310660]
ENSRNOT00000012837.7	2388	2190.42	25070	112.984	ENSRNOG00000009244.7	Abhd4	abhydrolase domain containing 4 [Source:RGD Symbol;Acc:1311858]
ENSRNOT00000011203.4	616	418.779	4791.85	112.956	ENSRNOG00000008459.4	Anapc13	anaphase promoting complex subunit 13 [Source:RGD Symbol;Acc:1583270]
ENSRNOT00000031272.5	1948	1750.42	20028.1	112.95	ENSRNOG00000025592.5	Tspan31	tetraspanin 31 [Source:RGD Symbol;Acc:1309876]
ENSRNOT00000020795.6	1952	1754.42	20070.8	112.933	ENSRNOG00000015329.6	Kpna2	karyopherin subunit alpha 2 [Source:RGD Symbol;Acc:621419]
ENSRNOT00000013914.4	3598	3400.42	38881	112.874	ENSRNOG00000009689.4	Api5	apoptosis inhibitor 5 [Source:RGD Symbol;Acc:1309772]
ENSRNOT00000082097.1	1131	933.422	10667.4	112.816	ENSRNOG00000010186.7	Cdv3	CDV3 homolog [Source:RGD Symbol;Acc:1359113]
ENSRNOT00000082066.1	1890	1692.42	19340	112.807	ENSRNOG00000055446.1	Amfr	autocrine motility factor receptor [Source:RGD Symbol;Acc:1311551]
ENSRNOT00000024583.5	2147	1949.42	22269	112.768	ENSRNOG00000018107.5	Zfand5	zinc finger AN1-type containing 5 [Source:RGD Symbol;Acc:1310776]
ENSRNOT00000005270.3	889	691.422	7887	112.605	ENSRNOG00000003863.3	Trir	telomerase RNA component interacting RNase [Source:RGD Symbol;Acc:1564093]
ENSRNOT00000020155.3	2399	2201.42	25098.6	112.548	ENSRNOG00000014779.5	Pdcd4	programmed cell death 4 [Source:RGD Symbol;Acc:620816]
ENSRNOT00000019104.6	1564	1366.42	15578	112.542	ENSRNOG00000014097.6	Psmd7	proteasome 26S subunit, non-ATPase 7 [Source:RGD Symbol;Acc:1306902]
ENSRNOT00000022214.7	2088	1890.42	21528.6	112.421	ENSRNOG00000016367.7	Vasp	vasodilator-stimulated phosphoprotein [Source:RGD Symbol;Acc:1311542]
ENSRNOT00000084730.1	3410	3212.42	36569.5	112.377	ENSRNOG00000001436.5	Ywhag	tyrosine 3-monooxygenase/tryptophan 5-monooxygenase activation protein, gamma [Source:RGD Symbol;Acc:62002]
ENSRNOT00000056457.5	3226	3028.42	34445.5	112.281	ENSRNOG00000033280.6	Pam	peptidylglycine alpha-amidating monooxygenase [Source:RGD Symbol;Acc:3252]
ENSRNOT00000000742.5	2178	1980.42	22516	112.234	ENSRNOG00000000604.5	Hdac2	histone deacetylase 2 [Source:RGD Symbol;Acc:619976]
ENSRNOT00000091210.1	3728	3530.42	40130.9	112.213	ENSRNOG00000061058.1	Csde1	cold shock domain containing E1 [Source:RGD Symbol;Acc:619726]
ENSRNOT00000016851.5	878	680.422	7732.98	112.191	ENSRNOG00000028746.6	Gsto1	glutathione S-transferase omega 1 [Source:RGD Symbol;Acc:70952]
ENSRNOT00000070984.2	1380	1182.42	13434	112.156	ENSRNOG00000045740.2	Tmx3	thioredoxin-related transmembrane protein 3 [Source:RGD Symbol;Acc:1592777]
ENSRNOT00000011330.6	1158	960.422	10892	111.953	ENSRNOG00000008236.6	Decr1	2,4-dienoyl-CoA reductase 1 [Source:RGD Symbol;Acc:70999]
ENSRNOT00000020385.5	1697	1499.42	16999.6	111.919	ENSRNOG00000014564.6	Yipf5	Yip1 domain family, member 5 [Source:RGD Symbol;Acc:1359165]
ENSRNOT00000062031.1	243	84.0711	953.054	111.908	ENSRNOG00000040303.1	Cebpzos	CEBPZ opposite strand [Source:RGD Symbol;Acc:9177508]
ENSRNOT00000055970.4	6584	6386.42	72310	111.771	ENSRNOG00000018309.7	Chd4	chromodomain helicase DNA binding protein 4 [Source:RGD Symbol;Acc:620064]
ENSRNOT00000091499.1	1598	1400.42	15851	111.735	ENSRNOG00000061128.1	Pelo	pelota mRNA surveillance and ribosome rescue factor [Source:RGD Symbol;Acc:1359591]
ENSRNOT00000000201.5	1217	1019.42	11517	111.526	ENSRNOG00000000185.5	Mpst	mercaptopyruvate sulfurtransferase [Source:RGD Symbol;Acc:620065]
ENSRNOT00000042875.4	1488	1290.42	14574	111.49	ENSRNOG00000013911.6	Nagk	N-acetylglucosamine kinase [Source:RGD Symbol;Acc:1305057]
ENSRNOT00000019707.6	977	779.422	8800	111.455	ENSRNOG00000014633.6	Vps28	VPS28 subunit of ESCRT-I [Source:RGD Symbol;Acc:1306537]
ENSRNOT00000024306.5	3065	2867.42	32353.1	111.382	ENSRNOG00000017730.6	Psmd1	proteasome 26S subunit, non-ATPase 1 [Source:RGD Symbol;Acc:621669]
ENSRNOT00000084597.1	255	92.3548	1042	111.378	ENSRNOG00000054999.1	Hilpda	hypoxia inducible lipid droplet-associated [Source:RGD Symbol;Acc:2319900]
ENSRNOT00000047126.5	3889	3691.42	41619	111.298	ENSRNOG00000008012.7	Abcb4	ATP binding cassette subfamily B member 4 [Source:RGD Symbol;Acc:620248]
ENSRNOT00000007374.6	1670	1472.42	16588	111.212	ENSRNOG00000005492.6	Hpcal1	hippocalcin-like 1 [Source:RGD Symbol;Acc:708375]
ENSRNOT00000082186.1	1929	1731.42	19498	111.167	ENSRNOG00000060949.1	Anxa8	annexin A8 [Source:RGD Symbol;Acc:1307719]
ENSRNOT00000008885.5	2883	2685.42	30205	111.034	ENSRNOG00000006646.6	Vopp1	VOPP1 WW domain binding protein [Source:RGD Symbol;Acc:1306494]
ENSRNOT00000013738.6	1449	1251.42	14059.2	110.904	ENSRNOG00000010204.6	Tmem9	transmembrane protein 9 [Source:RGD Symbol;Acc:1307922]
ENSRNOT00000015009.6	627	429.702	4822	110.777	ENSRNOG00000011214.6	Polr2f	RNA polymerase II subunit F [Source:RGD Symbol;Acc:708567]
ENSRNOT00000074515.2	2100	1902.42	21312.4	110.59	ENSRNOG00000000204.7	Syncrip	synaptotagmin binding, cytoplasmic RNA interacting protein [Source:RGD Symbol;Acc:1305683]
ENSRNOT00000030811.2	936	738.422	8270.34	110.563	ENSRNOG00000021960.2	AC109958.1	mortality factor 4-like protein 1-like [Source:NCBI gene;Acc:100910850]
ENSRNOT00000001921.4	2750	2552.42	28584.1	110.551	ENSRNOG00000001417.5	Plod3	procollagen-lysine, 2-oxoglutarate 5-dioxygenase 3 [Source:RGD Symbol;Acc:631339]
ENSRNOT00000011065.4	989	791.422	8858	110.489	ENSRNOG00000008372.4	Vamp7	vesicle-associated membrane protein 7 [Source:RGD Symbol;Acc:621558]
ENSRNOT00000026334.6	1633	1435.42	16065.4	110.484	ENSRNOG00000019298.7	Dctn4	dynactin subunit 4 [Source:RGD Symbol;Acc:71023]
ENSRNOT00000005837.4	873	675.422	7558.19	110.467	ENSRNOG00000024170.5	Phf5a	PHD finger protein 5A [Source:RGD Symbol;Acc:621555]
ENSRNOT00000018190.4	973	775.422	8674	110.426	ENSRNOG00000013454.4	Rala	RAS like proto-oncogene A [Source:RGD Symbol;Acc:619851]
ENSRNOT00000023728.5	644	446.667	4994.36	110.379	ENSRNOG00000042160.1	Tmem167b	transmembrane protein 167B [Source:RGD Symbol;Acc:1564454]
ENSRNOT00000002169.6	2521	2323.42	25979	110.378	ENSRNOG00000001592.6	Cct8	chaperonin containing TCP1 subunit 8 [Source:RGD Symbol;Acc:1305452]
ENSRNOT00000083191.1	550	353.671	3953	110.336	ENSRNOG00000056148.1	Nudcd3	NudC domain containing 3 [Source:RGD Symbol;Acc:1642416]
ENSRNOT00000024362.6	1641	1443.42	16131.9	110.327	ENSRNOG00000018044.6	Phyh	phytanoyl-CoA 2-hydroxylase [Source:RGD Symbol;Acc:620317]
ENSRNOT00000067483.3	1100	902.422	10085.3	110.324	ENSRNOG00000005614.7	Txn2	thioredoxin 2 [Source:RGD Symbol;Acc:71040]
ENSRNOT00000012258.3	1873	1675.42	18716.8	110.28	ENSRNOG00000009248.4	Pnrc2	proline-rich nuclear receptor coactivator 2 [Source:RGD Symbol;Acc:1642418]
ENSRNOT00000078562.1	3278	3080.42	34395.5	110.225	ENSRNOG00000061779.1	Man2b2	mannosidase, alpha, class 2B, member 2 [Source:RGD Symbol;Acc:1308840]
ENSRNOT00000077163.1	1634	1436.42	16026	110.137	ENSRNOG00000015019.6	Spg21	SPG21 abhydrolase domain containing, maspardin [Source:RGD Symbol;Acc:1359141]
ENSRNOT00000059169.2	1220	1022.42	11398	110.05	ENSRNOG00000022980.5	Sdhd	succinate dehydrogenase complex subunit D [Source:RGD Symbol;Acc:735231]
ENSRNOT00000021105.4	2484	2286.42	25484	110.027	ENSRNOG00000015511.4	Atic	5-aminoimidazole-4-carboxamide ribonucleotide formyltransferase/IMP cyclohydrolase [Source:RGD Symbol;Acc:70879]
ENSRNOT00000087513.1	1175	977.422	10889.5	109.98	ENSRNOG00000009856.7	Sypl1	synaptophysin-like 1 [Source:RGD Symbol;Acc:1359569]
ENSRNOT00000011484.4	517	321.398	3579	109.928	ENSRNOG00000008569.4	Ndufa6	NADH:ubiquinone oxidoreductase subunit A6 [Source:RGD Symbol;Acc:1309818]
ENSRNOT00000003282.5	2831	2633.42	29316.2	109.895	ENSRNOG00000002413.6	Gpc4	glypican 4 [Source:RGD Symbol;Acc:1359399]
ENSRNOT00000074457.3	2157	1959.42	21803.9	109.849	ENSRNOG00000047179.3	Aplp2	amyloid beta precursor like protein 2 [Source:RGD Symbol;Acc:2128]
ENSRNOT00000002381.6	1839	1641.42	18236.8	109.678	ENSRNOG00000001746.6	Ncbp2	nuclear cap binding protein subunit 2 [Source:RGD Symbol;Acc:1596188]
ENSRNOT00000066121.1	1282	1084.42	12040.2	109.604	ENSRNOG00000042037.1	Smim7	small integral membrane protein 7 [Source:RGD Symbol;Acc:1588793]
ENSRNOT00000080351.1	2039	1841.42	20427	109.507	ENSRNOG00000057284.1	Cenpb	centromere protein B [Source:RGD Symbol;Acc:1304794]
ENSRNOT00000024866.5	3012	2814.42	31217.7	109.497	ENSRNOG00000023317.4	Colgalt1	collagen beta(1-O)galactosyltransferase 1 [Source:RGD Symbol;Acc:1309002]
ENSRNOT00000016792.6	1885	1687.42	18694	109.362	ENSRNOG00000012329.6	Saraf	store-operated calcium entry-associated regulatory factor [Source:RGD Symbol;Acc:1303011]
ENSRNOT00000057222.2	669	471.612	5223.88	109.345	ENSRNOG00000011494.4	Rpl36a	ribosomal protein L36a [Source:RGD Symbol;Acc:1306640]
ENSRNOT00000050664.5	633	435.676	4824	109.303	ENSRNOG00000025509.7	Apbb2	amyloid beta precursor protein binding family B member 2 [Source:RGD Symbol;Acc:1562438]
ENSRNOT00000086019.1	1422	1224.42	13547	109.22	ENSRNOG00000055082.1	Maz	MYC associated zinc finger protein [Source:RGD Symbol;Acc:1594632]
ENSRNOT00000034723.6	1260	1062.42	11736	109.047	ENSRNOG00000011511.7	Stk24	serine/threonine kinase 24 [Source:RGD Symbol;Acc:1561742]
ENSRNOT00000011654.6	1419	1221.42	13479	108.939	ENSRNOG00000008604.7	Nsfl1c	NSFL1 cofactor [Source:RGD Symbol;Acc:619952]
ENSRNOT00000082086.1	2652	2454.42	27060.5	108.837	ENSRNOG00000031896.5	Stt3a	STT3 oligosaccharyltransferase complex catalytic subunit A [Source:RGD Symbol;Acc:1565793]
ENSRNOT00000006800.5	2104	1906.42	21015	108.818	ENSRNOG00000005034.5	Arhgef25	Rho guanine nucleotide exchange factor 25 [Source:RGD Symbol;Acc:735210]
ENSRNOT00000089612.1	3130	2932.42	32301	108.737	ENSRNOG00000060154.1	Ddx23	DEAD-box helicase 23 [Source:RGD Symbol;Acc:1308685]
ENSRNOT00000074217.1	1911	1713.42	18857	108.642	ENSRNOG00000050258.1	Ccnd3	cyclin D3 [Source:RGD Symbol;Acc:2293]
ENSRNOT00000090262.1	2862	2664.42	29321	108.634	ENSRNOG00000003123.8	Rpa1	replication protein A1 [Source:RGD Symbol;Acc:1307376]
ENSRNOT00000021309.7	1989	1791.42	19706.5	108.593	ENSRNOG00000015619.7	Agfg1	ArfGAP with FG repeats 1 [Source:RGD Symbol;Acc:1560041]
ENSRNOT00000001419.5	1226	1028.42	11297	108.438	ENSRNOG00000001070.5	Cdk2ap1	cyclin-dependent kinase 2 associated protein 1 [Source:RGD Symbol;Acc:1308664]
ENSRNOT00000013997.6	1288	1090.42	11973	108.392	ENSRNOG00000010038.6	Psmc5	proteasome 26S subunit, ATPase 5 [Source:RGD Symbol;Acc:708376]
ENSRNOT00000006168.7	1565	1367.42	15008	108.345	ENSRNOG00000004505.7	Nfic	nuclear factor I/C [Source:RGD Symbol;Acc:62016]
ENSRNOT00000020472.6	2625	2427.42	26637	108.325	ENSRNOG00000014614.6	Cxxc1	CXXC finger protein 1 [Source:RGD Symbol;Acc:1310755]
ENSRNOT00000038395.4	1754	1556.42	17056.4	108.18	ENSRNOG00000021725.5	Unc119b	unc-119 lipid binding chaperone B [Source:RGD Symbol;Acc:1309359]
ENSRNOT00000009839.4	4141	3943.42	43181	108.096	ENSRNOG00000006803.5	Dnajc10	DnaJ heat shock protein family (Hsp40) member C10 [Source:RGD Symbol;Acc:1307813]
ENSRNOT00000019620.4	1255	1057.42	11568	107.994	ENSRNOG00000014270.4	Rer1	retention in endoplasmic reticulum sorting receptor 1 [Source:RGD Symbol;Acc:1306324]
ENSRNOT00000040229.3	1656	1458.42	15943	107.914	ENSRNOG00000037162.3	Slbp	stem-loop binding protein [Source:RGD Symbol;Acc:1584682]
ENSRNOT00000019623.7	855	657.422	7169	107.648	ENSRNOG00000014330.7	Pcmt1	protein-L-isoaspartate (D-aspartate) O-methyltransferase 1 [Source:RGD Symbol;Acc:3268]
ENSRNOT00000059715.2	1330	1132.42	12347.7	107.638	ENSRNOG00000010386.4	H2ax	H2A.X variant histone [Source:RGD Symbol;Acc:1566119]
ENSRNOT00000044865.7	2885	2687.42	29225.4	107.353	ENSRNOG00000010448.9	Ptbp1	polypyrimidine tract binding protein 1 [Source:RGD Symbol;Acc:62047]
ENSRNOT00000039306.4	2635	2437.42	26473.9	107.22	ENSRNOG00000025023.4	Stat6	signal transducer and activator of transcription 6 [Source:RGD Symbol;Acc:1309063]
ENSRNOT00000002462.6	1927	1729.42	18777	107.18	ENSRNOG00000001803.6	Dnajb11	DnaJ heat shock protein family (Hsp40) member B11 [Source:RGD Symbol;Acc:1307373]
ENSRNOT00000026928.7	1009	811.422	8805	107.12	ENSRNOG00000019868.7	Psma5	proteasome 20S subunit alpha 5 [Source:RGD Symbol;Acc:61848]
ENSRNOT00000019409.6	1239	1041.42	11294.1	107.057	ENSRNOG00000048800.2	AABR07031756.1
ENSRNOT00000014887.5	1427	1229.42	13324.1	106.986	ENSRNOG00000023830.4	Dnase2	deoxyribonuclease 2, lysosomal [Source:RGD Symbol;Acc:621457]
ENSRNOT00000004942.5	3435	3237.42	35071	106.94	ENSRNOG00000003691.5	Tmed7	transmembrane p24 trafficking protein 7 [Source:RGD Symbol;Acc:727954]
ENSRNOT00000027076.3	766	568.47	6143	106.675	ENSRNOG00000019987.3	Scand1	SCAN domain-containing 1 [Source:RGD Symbol;Acc:1308530]
ENSRNOT00000065229.2	4008	3810.42	41166.2	106.649	ENSRNOG00000007462.7	Septin8	septin 8 [Source:RGD Symbol;Acc:1308449]
ENSRNOT00000011907.7	1320	1122.42	12103	106.445	ENSRNOG00000008672.7	Chmp5	charged multivesicular body protein 5 [Source:RGD Symbol;Acc:1305968]
ENSRNOT00000009621.6	471	277.11	2984	106.301	ENSRNOG00000007336.7	Churc1	churchill domain containing 1 [Source:RGD Symbol;Acc:1305116]
ENSRNOT00000058852.4	1935	1737.42	18707	106.289	ENSRNOG00000018698.7	Wac	WW domain containing adaptor with coiled-coil [Source:RGD Symbol;Acc:1562407]
ENSRNOT00000008364.7	1141	943.422	10154	106.248	ENSRNOG00000005884.7	Emc7	ER membrane protein complex subunit 7 [Source:RGD Symbol;Acc:1305045]
ENSRNOT00000008008.3	2175	1977.42	21272	106.194	ENSRNOG00000021403.2	Rhob	ras homolog family member B [Source:RGD Symbol;Acc:621309]
ENSRNOT00000026091.4	3145	2947.42	31677	106.094	ENSRNOG00000019152.4	Trpc4ap	transient receptor potential cation channel, subfamily C, member 4 associated protein [Source:RGD Symbol;Acc:1309914]
ENSRNOT00000012260.6	2048	1850.42	19872	106.013	ENSRNOG00000008945.6	Nans	N-acetylneuraminate synthase [Source:RGD Symbol;Acc:1311943]
ENSRNOT00000026327.7	5184	4986.42	53508	105.93	ENSRNOG00000019400.7	Dag1	dystroglycan 1 [Source:RGD Symbol;Acc:621890]
ENSRNOT00000024083.5	908	710.422	7621	105.897	ENSRNOG00000017851.5	Etfb	electron transfer flavoprotein subunit beta [Source:RGD Symbol;Acc:1303312]
ENSRNOT00000022014.5	1607	1409.42	15112	105.845	ENSRNOG00000016273.5	Fam136a	family with sequence similarity 136, member A [Source:RGD Symbol;Acc:1304825]
ENSRNOT00000029712.4	629	431.693	4625.9	105.782	ENSRNOG00000024539.5	Ndufb6	NADH:ubiquinone oxidoreductase subunit B6 [Source:RGD Symbol;Acc:1311354]
ENSRNOT00000000707.6	4180	3982.42	42669	105.768	ENSRNOG00000000579.6	Marcks	myristoylated alanine rich protein kinase C substrate [Source:RGD Symbol;Acc:3028]
ENSRNOT00000015179.7	5270	5072.42	54274.9	105.627	ENSRNOG00000010765.7	Vcl	vinculin [Source:RGD Symbol;Acc:1311217]
ENSRNOT00000007351.5	849	651.422	6964	105.532	ENSRNOG00000005556.5	Snrpf	small nuclear ribonucleoprotein polypeptide F [Source:RGD Symbol;Acc:1588229]
ENSRNOT00000013785.6	2280	2082.42	22228	105.371	ENSRNOG00000009889.6	Pgm1	phosphoglucomutase 1 [Source:RGD Symbol;Acc:3316]
ENSRNOT00000037393.5	1060	862.422	9204	105.353	ENSRNOG00000023322.5	Ostc	oligosaccharyltransferase complex non-catalytic subunit [Source:RGD Symbol;Acc:1560708]
ENSRNOT00000076222.1	356	172.322	1836.65	105.214	ENSRNOG00000047261.3	AABR07031445.1
ENSRNOT00000039383.4	1138	940.422	10019	105.17	ENSRNOG00000024899.5	Cxcl13	C-X-C motif chemokine ligand 13 [Source:RGD Symbol;Acc:1564256]
ENSRNOT00000033627.3	4122	3924.42	41802	105.15	ENSRNOG00000026842.5	Nnt	nicotinamide nucleotide transhydrogenase [Source:RGD Symbol;Acc:1587346]
ENSRNOT00000000635.6	1802	1604.42	17085.3	105.122	ENSRNOG00000000527.6	Mtch1	mitochondrial carrier 1 [Source:RGD Symbol;Acc:1309262]
ENSRNOT00000027917.7	1418	1220.42	12993.5	105.101	ENSRNOG00000043007.3	Rcn3	reticulocalbin 3 [Source:RGD Symbol;Acc:1359365]
ENSRNOT00000030892.4	456	262.924	2797	105.015	ENSRNOG00000026616.4	Ndufb2	NADH:ubiquinone oxidoreductase subunit B2 [Source:RGD Symbol;Acc:1308130]
ENSRNOT00000014300.7	4577	4379.42	46563	104.958	ENSRNOG00000010737.7	Mbnl2	muscleblind-like splicing regulator 2 [Source:RGD Symbol;Acc:1591755]
ENSRNOT00000075656.1	1266	1068.42	11357	104.933	ENSRNOG00000049828.1	Crlf2	cytokine receptor-like factor 2 [Source:RGD Symbol;Acc:621078]
ENSRNOT00000021920.6	1206	1008.42	10718.6	104.926	ENSRNOG00000016000.6	Atp5pb	ATP synthase peripheral stalk-membrane subunit b [Source:RGD Symbol;Acc:620041]
ENSRNOT00000075083.2	1206	1008.42	10718.6	104.926	ENSRNOG00000046299.2	LOC100911417	ATP synthase subunit b, mitochondrial-like [Source:RGD Symbol;Acc:6493308]
ENSRNOT00000022126.6	2453	2255.42	23973	104.926	ENSRNOG00000016265.7	Acsl5	acyl-CoA synthetase long-chain family member 5 [Source:RGD Symbol;Acc:69402]
ENSRNOT00000027693.2	1442	1244.42	13226	104.918	ENSRNOG00000020385.3	Fads3	fatty acid desaturase 3 [Source:RGD Symbol;Acc:628876]
ENSRNOT00000001822.5	1091	893.422	9486.48	104.819	ENSRNOG00000001348.5	Erp29	endoplasmic reticulum protein 29 [Source:RGD Symbol;Acc:619781]
ENSRNOT00000045997.4	766	568.47	6031	104.73	ENSRNOG00000028822.4	Bex3	brain expressed X-linked 3 [Source:RGD Symbol;Acc:3148]
ENSRNOT00000007071.6	1902	1704.42	18082	104.727	ENSRNOG00000005126.6	Slc66a3	solute carrier family 66 member 3 [Source:RGD Symbol;Acc:1306818]
ENSRNOT00000008525.5	1324	1126.42	11944.1	104.675	ENSRNOG00000006359.5	Galk1	galactokinase 1 [Source:RGD Symbol;Acc:1305375]
ENSRNOT00000018646.5	832	634.422	6726	104.657	ENSRNOG00000013714.5	Snrpd1	small nuclear ribonucleoprotein D1 polypeptide [Source:RGD Symbol;Acc:1306345]
ENSRNOT00000022676.6	1984	1786.42	18935	104.634	ENSRNOG00000016486.6	Nop58	NOP58 ribonucleoprotein [Source:RGD Symbol;Acc:620484]
ENSRNOT00000084168.1	1476	1278.42	13546.7	104.604	ENSRNOG00000060288.1	LOC100365062	eukaryotic translation initiation factor 3, subunit 6 48kDa-like [Source:RGD Symbol;Acc:2319808]
ENSRNOT00000020402.6	1937	1739.42	18420	104.538	ENSRNOG00000015128.6	Sae1	SUMO1 activating enzyme subunit 1 [Source:RGD Symbol;Acc:1306098]
ENSRNOT00000013067.3	4724	4526.42	47889.5	104.442	ENSRNOG00000009832.6	Slc39a14	solute carrier family 39 member 14 [Source:RGD Symbol;Acc:1307026]
ENSRNOT00000067636.3	2701	2503.42	26482	104.425	ENSRNOG00000012940.7	Vps41	VPS41 subunit of HOPS complex [Source:RGD Symbol;Acc:1560511]
ENSRNOT00000049973.5	3423	3225.42	34114	104.408	ENSRNOG00000031824.5	Slc44a2	solute carrier family 44 member 2 [Source:RGD Symbol;Acc:1309680]
ENSRNOT00000080836.1	1237	1039.42	10990.8	104.383	ENSRNOG00000010676.7	Smarce1	SWI/SNF related, matrix associated, actin dependent regulator of chromatin, subfamily e, member 1 [Source:RGD Symbol;Acc:1304726]
ENSRNOT00000016965.5	889	691.422	7310	104.367	ENSRNOG00000042503.2	Ndufv2	NADH:ubiquinone oxidoreductase core subunit V2 [Source:RGD Symbol;Acc:621733]
ENSRNOT00000017067.7	1195	997.422	10545	104.366	ENSRNOG00000012457.7	Cyc1	cytochrome c-1 [Source:RGD Symbol;Acc:1306597]
ENSRNOT00000015564.7	3734	3536.42	37381.5	104.348	ENSRNOG00000011589.8	Camk2d	calcium/calmodulin-dependent protein kinase II delta [Source:RGD Symbol;Acc:2263]
ENSRNOT00000084682.1	1343	1145.42	12103.1	104.308	ENSRNOG00000014289.7	Arpc2	actin related protein 2/3 complex, subunit 2 [Source:RGD Symbol;Acc:1305848]
ENSRNOT00000025362.3	2763	2565.42	27106.5	104.305	ENSRNOG00000018770.3	Pmaip1	phorbol-12-myristate-13-acetate-induced protein 1 [Source:RGD Symbol;Acc:1359266]
ENSRNOT00000014062.4	4381	4183.42	44193	104.283	ENSRNOG00000009935.5	Xpo1	exportin 1 [Source:RGD Symbol;Acc:620517]
ENSRNOT00000073005.1	5086	4888.42	51635	104.271	ENSRNOG00000050323.1	Srsf1	serine and arginine rich splicing factor 1 [Source:RGD Symbol;Acc:1587490]
ENSRNOT00000010720.3	4383	4185.42	44194	104.235	ENSRNOG00000007834.5	Cand1	cullin-associated and neddylation-dissociated 1 [Source:RGD Symbol;Acc:620479]
ENSRNOT00000010380.7	548	351.713	3710	104.13	ENSRNOG00000007784.7	Bloc1s1	biogenesis of lysosomal organelles complex-1, subunit 1 [Source:RGD Symbol;Acc:1307564]
ENSRNOT00000017224.6	2092	1894.42	19921.6	103.809	ENSRNOG00000012865.6	Parp3	poly (ADP-ribose) polymerase family, member 3 [Source:RGD Symbol;Acc:1305189]
ENSRNOT00000005930.4	2019	1821.42	19144	103.756	ENSRNOG00000004494.5	Lta4h	leukotriene A4 hydrolase [Source:RGD Symbol;Acc:1311333]
ENSRNOT00000018877.7	3112	2914.42	30608	103.675	ENSRNOG00000013963.7	Il6st	interleukin 6 signal transducer [Source:RGD Symbol;Acc:2903]
ENSRNOT00000004319.3	1437	1239.42	13006	103.589	ENSRNOG00000003223.3	Degs1	delta(4)-desaturase, sphingolipid 1 [Source:RGD Symbol;Acc:70917]
ENSRNOT00000009100.6	2502	2304.42	24154	103.471	ENSRNOG00000006652.6	Ddx1	DEAD-box helicase 1 [Source:RGD Symbol;Acc:619903]
ENSRNOT00000081886.1	585	388.118	4066.76	103.437	ENSRNOG00000057978.1	AABR07028997.1
ENSRNOT00000091448.1	2275	2077.42	21737.3	103.293	ENSRNOG00000023383.6	Ddx3x	DEAD-box helicase 3, X-linked [Source:RGD Symbol;Acc:1564771]
ENSRNOT00000011394.5	1897	1699.42	17757	103.147	ENSRNOG00000008427.5	Necap2	NECAP endocytosis associated 2 [Source:RGD Symbol;Acc:735063]
ENSRNOT00000025353.5	1100	902.422	9427	103.123	ENSRNOG00000018653.5	Pfdn1	prefoldin subunit 1 [Source:RGD Symbol;Acc:1305603]
ENSRNOT00000067668.3	2113	1915.42	19977	102.957	ENSRNOG00000008079.7	Ugp2	UDP-glucose pyrophosphorylase 2 [Source:RGD Symbol;Acc:1310210]
ENSRNOT00000077236.1	1131	933.422	9728.01	102.881	ENSRNOG00000020667.7	Shisa5	shisa family member 5 [Source:RGD Symbol;Acc:1359661]
ENSRNOT00000027234.5	2487	2289.42	23844	102.812	ENSRNOG00000019996.5	Slc16a1	solute carrier family 16 member 1 [Source:RGD Symbol;Acc:3690]
ENSRNOT00000018225.6	3741	3543.42	36901	102.803	ENSRNOG00000028650.7	Inf2	inverted formin, FH2 and WH2 domain containing [Source:NCBI gene;Acc:362790]
ENSRNOT00000000749.6	727	529.514	5513	102.778	ENSRNOG00000000610.6	Cisd1	CDGSH iron sulfur domain 1 [Source:RGD Symbol;Acc:1309529]
ENSRNOT00000073317.2	777	579.458	6014.86	102.469	ENSRNOG00000049622.2	LOC103690013	H/ACA ribonucleoprotein complex subunit 2 [Source:RGD Symbol;Acc:9459675]
ENSRNOT00000027818.5	925	727.422	7548	102.432	ENSRNOG00000020474.6	Pin1	peptidylprolyl cis/trans isomerase, NIMA-interacting 1 [Source:RGD Symbol;Acc:1310299]
ENSRNOT00000067846.3	3114	2916.42	30250	102.392	ENSRNOG00000043210.4	Ppp3r1	protein phosphatase 3, regulatory subunit B, alpha [Source:RGD Symbol;Acc:69230]
ENSRNOT00000042711.4	1847	1649.42	17095	102.312	ENSRNOG00000050510.2	Rab1b	RAB1B, member RAS oncogene family [Source:RGD Symbol;Acc:1642882]
ENSRNOT00000017794.5	643	445.667	4619	102.312	ENSRNOG00000012985.5	Pfdn5	prefoldin subunit 5 [Source:RGD Symbol;Acc:1311436]
ENSRNOT00000003715.4	2822	2624.42	27197	102.3	ENSRNOG00000002705.4	Vps4b	vacuolar protein sorting 4 homolog B [Source:RGD Symbol;Acc:1305969]
ENSRNOT00000009649.5	2379	2181.42	22596.9	102.258	ENSRNOG00000007203.5	Psmc6	proteasome 26S subunit, ATPase 6 [Source:RGD Symbol;Acc:1308825]
ENSRNOT00000043559.4	931	733.422	7590.04	102.16	ENSRNOG00000003049.7	Hsd17b10	hydroxysteroid (17-beta) dehydrogenase 10 [Source:RGD Symbol;Acc:69231]
ENSRNOT00000007276.5	2011	1813.42	18765.4	102.152	ENSRNOG00000005256.5	Zc3h15	zinc finger CCCH-type containing 15 [Source:RGD Symbol;Acc:1359234]
ENSRNOT00000079388.1	1550	1352.42	13987	102.094	ENSRNOG00000053196.1	Slc48a1	solute carrier family 48 member 1 [Source:RGD Symbol;Acc:1562880]
ENSRNOT00000019713.6	4712	4514.42	46628	101.961	ENSRNOG00000014617.7	Tgoln2	trans-golgi network protein 2 [Source:RGD Symbol;Acc:620445]
ENSRNOT00000048529.4	2136	1938.42	20012	101.914	ENSRNOG00000031312.5	Tnfrsf1a	TNF receptor superfamily member 1A [Source:RGD Symbol;Acc:621237]
ENSRNOT00000008909.7	2005	1807.42	18657	101.899	ENSRNOG00000006778.7	Mmp19	matrix metallopeptidase 19 [Source:RGD Symbol;Acc:1311376]
ENSRNOT00000007164.5	1196	998.422	10304	101.878	ENSRNOG00000005358.5	Pmm1	phosphomannomutase 1 [Source:RGD Symbol;Acc:1310897]
ENSRNOT00000002044.6	1537	1339.42	13810	101.781	ENSRNOG00000001494.6	Napa	NSF attachment protein alpha [Source:RGD Symbol;Acc:620855]
ENSRNOT00000056289.3	2037	1839.42	18957.1	101.737	ENSRNOG00000023816.5	Aph1a	aph-1 homolog A, gamma secretase subunit [Source:RGD Symbol;Acc:1311546]
ENSRNOT00000010700.6	1471	1273.42	13115	101.668	ENSRNOG00000008090.6	Txndc12	thioredoxin domain containing 12 [Source:RGD Symbol;Acc:1305960]
ENSRNOT00000077331.1	2015	1817.42	18713.6	101.646	ENSRNOG00000015461.7	Serpine2	serpin family E member 2 [Source:RGD Symbol;Acc:3748]
ENSRNOT00000051554.4	1721	1523.42	15676	101.579	ENSRNOG00000030055.4	Vamp3	vesicle-associated membrane protein 3 [Source:RGD Symbol;Acc:61880]
ENSRNOT00000024695.6	1400	1202.42	12372.6	101.576	ENSRNOG00000018214.6	Bok	BCL2 family apoptosis regulator BOK [Source:RGD Symbol;Acc:70984]
ENSRNOT00000023429.3	1206	1008.42	10356.5	101.382	ENSRNOG00000017405.7	Raly	RALY heterogeneous nuclear ribonucleoprotein [Source:RGD Symbol;Acc:1307228]
ENSRNOT00000050631.4	2034	1836.42	18853	101.344	ENSRNOG00000017832.6	Snx2	sorting nexin 2 [Source:RGD Symbol;Acc:1310291]
ENSRNOT00000005996.4	2081	1883.42	19331	101.32	ENSRNOG00000004515.4	Pes1	pescadillo ribosomal biogenesis factor 1 [Source:RGD Symbol;Acc:1559814]
ENSRNOT00000002510.6	3339	3141.42	32199.3	101.183	ENSRNOG00000001833.6	Mcm4	minichromosome maintenance complex component 4 [Source:RGD Symbol;Acc:3060]
ENSRNOT00000034334.5	1377	1179.42	12082	101.125	ENSRNOG00000027151.5	Lrrc58	leucine rich repeat containing 58 [Source:RGD Symbol;Acc:1307440]
ENSRNOT00000004862.5	1384	1186.42	12150	101.094	ENSRNOG00000003661.6	Jpt1	Jupiter microtubule associated homolog 1 [Source:RGD Symbol;Acc:1359325]
ENSRNOT00000010300.7	1417	1219.42	12471.1	100.958	ENSRNOG00000007504.7	Actr10	actin related protein 10 [Source:RGD Symbol;Acc:1306515]
ENSRNOT00000005144.4	1207	1009.42	10303	100.758	ENSRNOG00000003815.4	Slc25a11	solute carrier family 25 member 11 [Source:RGD Symbol;Acc:708476]
ENSRNOT00000092019.1	3723	3525.42	35955.3	100.679	ENSRNOG00000060793.1	Eif2s3	eukaryotic translation initiation factor 2 subunit gamma [Source:RGD Symbol;Acc:1561279]
ENSRNOT00000047678.4	1857	1659.42	16913.6	100.616	ENSRNOG00000001827.8	Masp1	mannan-binding lectin serine peptidase 1 [Source:RGD Symbol;Acc:620213]
ENSRNOT00000057827.4	831	633.422	6456	100.614	ENSRNOG00000017595.7	Rsu1	Ras suppressor protein 1 [Source:RGD Symbol;Acc:1591781]
ENSRNOT00000028699.4	2012	1814.42	18487.2	100.582	ENSRNOG00000021138.6	Cers2	ceramide synthase 2 [Source:RGD Symbol;Acc:1310059]
ENSRNOT00000023628.3	4520	4322.42	44032	100.561	ENSRNOG00000016596.3	Hspa4	heat shock protein family A (Hsp70) member 4 [Source:RGD Symbol;Acc:628878]
ENSRNOT00000019656.4	2902	2704.42	27546	100.548	ENSRNOG00000014647.5	Cbfb	core-binding factor subunit beta [Source:RGD Symbol;Acc:620493]
ENSRNOT00000048188.5	2049	1851.42	18845	100.48	ENSRNOG00000032759.5	Cdx2	caudal type homeo box 2 [Source:RGD Symbol;Acc:621234]
ENSRNOT00000005815.6	839	641.422	6528.47	100.475	ENSRNOG00000004401.6	Mrpl13	mitochondrial ribosomal protein L13 [Source:RGD Symbol;Acc:1359587]
ENSRNOT00000010887.5	2198	2000.42	20360	100.472	ENSRNOG00000008215.5	Trim47	tripartite motif-containing 47 [Source:RGD Symbol;Acc:1597317]
ENSRNOT00000017252.6	1445	1247.42	12687.7	100.406	ENSRNOG00000046357.2	Adh5	alcohol dehydrogenase 5 (class III), chi polypeptide [Source:RGD Symbol;Acc:2292706]
ENSRNOT00000086147.1	2316	2118.42	21519.9	100.281	ENSRNOG00000010897.6	Nek6	NIMA-related kinase 6 [Source:RGD Symbol;Acc:727779]
ENSRNOT00000009425.7	474	279.975	2844	100.277	ENSRNOG00000006939.7	Ndufa7	NADH:ubiquinone oxidoreductase subunit A7 [Source:RGD Symbol;Acc:1304597]
ENSRNOT00000056166.4	5503	5305.42	53888.7	100.269	ENSRNOG00000020748.7	Map4	microtubule-associated protein 4 [Source:RGD Symbol;Acc:1564359]
ENSRNOT00000081634.1	2221	2023.42	20547.7	100.246	ENSRNOG00000058908.1	Hmgb1	high mobility group box 1 [Source:RGD Symbol;Acc:2802]
ENSRNOT00000083577.1	1401	1203.42	12219.5	100.236	ENSRNOG00000007330.7	Capzb	capping actin protein of muscle Z-line subunit beta [Source:RGD Symbol;Acc:1359099]
ENSRNOT00000028143.3	1628	1430.42	14524	100.233	ENSRNOG00000020723.3	Pten	phosphatase and tensin homolog [Source:RGD Symbol;Acc:61995]
ENSRNOT00000028328.5	831	633.422	6419.7	100.049	ENSRNOG00000020876.6	Bax	BCL2 associated X, apoptosis regulator [Source:RGD Symbol;Acc:2192]
ENSRNOT00000087075.1	1592	1394.42	14130	100.032	ENSRNOG00000007738.7	Hm13	histocompatibility minor 13 [Source:RGD Symbol;Acc:1308946]
ENSRNOT00000009417.5	4582	4384.42	44411	99.9926	ENSRNOG00000007151.6	Cdk14	cyclin-dependent kinase 14 [Source:RGD Symbol;Acc:1305544]
ENSRNOT00000090858.1	2691	2493.42	25194	99.745	ENSRNOG00000053210.1	Zc3h11a	zinc finger CCCH-type containing 11A [Source:RGD Symbol;Acc:1308290]
ENSRNOT00000055500.2	2856	2658.42	26856	99.7257	ENSRNOG00000006868.4	Ube2z	ubiquitin-conjugating enzyme E2Z [Source:RGD Symbol;Acc:1308347]
ENSRNOT00000007255.6	2949	2751.42	27788	99.6988	ENSRNOG00000004936.6	Sdc2	syndecan 2 [Source:RGD Symbol;Acc:3649]
ENSRNOT00000083472.1	925	727.422	7346.45	99.6967	ENSRNOG00000006789.6	Ddit3	DNA-damage inducible transcript 3 [Source:RGD Symbol;Acc:62391]
ENSRNOT00000010252.6	2129	1931.42	19489	99.6098	ENSRNOG00000007739.6	Rars1	arginyl-tRNA synthetase 1 [Source:RGD Symbol;Acc:1309215]
ENSRNOT00000085805.1	3151	2953.42	29795.2	99.5889	ENSRNOG00000005310.6	Cul1	cullin 1 [Source:RGD Symbol;Acc:1308157]
ENSRNOT00000019735.5	1531	1333.42	13446	99.544	ENSRNOG00000014485.5	Pdcd6	programmed cell death 6 [Source:RGD Symbol;Acc:1311239]
ENSRNOT00000026862.5	2016	1818.42	18327	99.4916	ENSRNOG00000019812.5	Nr1h2	nuclear receptor subfamily 1, group H, member 2 [Source:RGD Symbol;Acc:61906]
ENSRNOT00000033784.4	2921	2723.42	27447	99.4876	ENSRNOG00000024428.4	Kif20a	kinesin family member 20A [Source:RGD Symbol;Acc:1307695]
ENSRNOT00000093720.1	767	569.47	5737	99.4497	ENSRNOG00000062276.1	AABR07044631.2
ENSRNOT00000075850.2	1380	1182.42	11906.7	99.4053	ENSRNOG00000011540.8	Vta1	vesicle trafficking 1 [Source:RGD Symbol;Acc:1305031]
ENSRNOT00000025644.6	1235	1037.42	10440.5	99.3469	ENSRNOG00000018904.7	Dtymk	deoxythymidylate kinase [Source:RGD Symbol;Acc:1309614]
ENSRNOT00000085725.1	1291	1093.42	10999	99.3012	ENSRNOG00000010895.6	Tmem30a	transmembrane protein 30A [Source:RGD Symbol;Acc:1303315]
ENSRNOT00000001190.3	1394	1196.42	12031	99.2675	ENSRNOG00000000888.3	Sbds	SBDS, ribosome maturation factor [Source:RGD Symbol;Acc:1311043]
ENSRNOT00000050321.4	1874	1676.42	16857	99.2628	ENSRNOG00000007283.6	Erlec1	endoplasmic reticulum lectin 1 [Source:RGD Symbol;Acc:1306508]
ENSRNOT00000009249.5	1361	1163.42	11689	99.1813	ENSRNOG00000006751.5	Psmd6	proteasome 26S subunit, non-ATPase 6 [Source:RGD Symbol;Acc:735127]
ENSRNOT00000009155.5	1110	912.422	9166.53	99.1743	ENSRNOG00000030520.3	Sarnp	SAP domain containing ribonucleoprotein [Source:RGD Symbol;Acc:1305692]
ENSRNOT00000038352.6	2811	2613.42	26253.8	99.1684	ENSRNOG00000025383.6	Pdha1	pyruvate dehydrogenase E1 alpha 1 subunit [Source:RGD Symbol;Acc:3286]
ENSRNOT00000065494.1	2887	2689.42	27014	99.1561	ENSRNOG00000016366.6	Colec12	collectin sub-family member 12 [Source:RGD Symbol;Acc:735039]
ENSRNOT00000029266.5	2549	2351.42	23611	99.1228	ENSRNOG00000024650.5	Ckap2	cytoskeleton associated protein 2 [Source:RGD Symbol;Acc:1311631]
ENSRNOT00000047674.4	6245	6047.42	60627	98.9659	ENSRNOG00000033090.4	Ltbp1	latent transforming growth factor beta binding protein 1 [Source:RGD Symbol;Acc:68379]
ENSRNOT00000025303.3	1984	1786.42	17901.3	98.9213	ENSRNOG00000018677.3	Akt2	AKT serine/threonine kinase 2 [Source:RGD Symbol;Acc:2082]
ENSRNOT00000075964.1	1453	1255.42	12573	98.8641	ENSRNOG00000051232.2	Gbe1	1,4-alpha-glucan branching enzyme 1 [Source:RGD Symbol;Acc:1309968]
ENSRNOT00000010464.4	1818	1620.42	16226	98.8492	ENSRNOG00000007671.4	Smu1	SMU1, DNA replication regulator and spliceosomal factor [Source:RGD Symbol;Acc:620694]
ENSRNOT00000025649.5	3317	3119.42	31233.6	98.841	ENSRNOG00000018901.5	Rab14	RAB14, member RAS oncogene family [Source:RGD Symbol;Acc:620881]
ENSRNOT00000088549.1	3159	2961.42	29645.1	98.8193	ENSRNOG00000004912.7	Itgav	integrin subunit alpha V [Source:RGD Symbol;Acc:1310613]
ENSRNOT00000090987.1	4405	4207.42	42111.5	98.8039	ENSRNOG00000059474.1	Mob1a	MOB kinase activator 1A [Source:RGD Symbol;Acc:1307014]
ENSRNOT00000022573.5	1838	1640.42	16413	98.7693	ENSRNOG00000016251.5	Dnaja2	DnaJ heat shock protein family (Hsp40) member A2 [Source:RGD Symbol;Acc:71001]
ENSRNOT00000044608.5	1938	1740.42	17382.5	98.5935	ENSRNOG00000034066.5	Hspa8	heat shock protein family A (Hsp70) member 8 [Source:RGD Symbol;Acc:621725]
ENSRNOT00000025819.5	1417	1219.42	12179	98.5933	ENSRNOG00000018994.5	Psmc4	proteasome 26S subunit, ATPase 4 [Source:RGD Symbol;Acc:621102]
ENSRNOT00000016608.2	1628	1430.42	14271	98.4872	ENSRNOG00000012228.2	Skap2	src kinase associated phosphoprotein 2 [Source:RGD Symbol;Acc:620159]
ENSRNOT00000009681.6	1506	1308.42	13050	98.4583	ENSRNOG00000007316.6	Idh3b	isocitrate dehydrogenase (NAD(+)) 3 non-catalytic subunit beta [Source:RGD Symbol;Acc:621881]
ENSRNOT00000007298.4	2779	2581.42	25739.5	98.4308	ENSRNOG00000005061.5	Dlst	dihydrolipoamide S-succinyltransferase [Source:RGD Symbol;Acc:1359615]
ENSRNOT00000074804.2	643	445.667	4441.26	98.375	ENSRNOG00000050827.2	NEWGENE_1310561	programmed cell death 5 [Source:RGD Symbol;Acc:11480964]
ENSRNOT00000032944.2	1911	1713.42	17074	98.3695	ENSRNOG00000021962.2	Fzd2	frizzled class receptor 2 [Source:RGD Symbol;Acc:71012]
ENSRNOT00000080422.1	662	464.64	4624.92	98.2601	ENSRNOG00000051483.1	LOC103689961	selenoprotein W-like [Source:RGD Symbol;Acc:9418506]
ENSRNOT00000003346.4	1868	1670.42	16626	98.2542	ENSRNOG00000002433.5	G3bp2	G3BP stress granule assembly factor 2 [Source:RGD Symbol;Acc:1309571]
ENSRNOT00000064588.4	2443	2245.42	22336.6	98.1996	ENSRNOG00000024213.6	Golim4	golgi integral membrane protein 4 [Source:RGD Symbol;Acc:1310948]
ENSRNOT00000002649.5	1172	974.422	9693	98.1976	ENSRNOG00000001930.7	Ccdc50	coiled-coil domain containing 50 [Source:RGD Symbol;Acc:727841]
ENSRNOT00000002361.6	1980	1782.42	17712	98.095	ENSRNOG00000001733.7	Ppp1r2	protein phosphatase 1, regulatory (inhibitor) subunit 2 [Source:RGD Symbol;Acc:621099]
ENSRNOT00000043895.4	6803	6605.42	65633	98.087	ENSRNOG00000012157.7	Snrnp200	small nuclear ribonucleoprotein U5 subunit 200 [Source:RGD Symbol;Acc:1561120]
ENSRNOT00000067375.3	3417	3219.42	31949	97.9646	ENSRNOG00000038933.4	Spcs3	signal peptidase complex subunit 3 [Source:RGD Symbol;Acc:1588184]
ENSRNOT00000074081.2	951	753.422	7476	97.9537	ENSRNOG00000045860.2	U2af1	U2 small nuclear RNA auxiliary factor 1 [Source:RGD Symbol;Acc:1584190]
ENSRNOT00000013299.4	960	762.422	7562	97.9109	ENSRNOG00000037768.2	Rab43	RAB43, member RAS oncogene family [Source:RGD Symbol;Acc:1565300]
ENSRNOT00000082484.1	2042	1844.42	18290	97.8911	ENSRNOG00000051965.1	Smad4	SMAD family member 4 [Source:RGD Symbol;Acc:3033]
ENSRNOT00000023514.5	2523	2325.42	23025	97.7434	ENSRNOG00000017426.5	Rragc	Ras-related GTP binding C [Source:RGD Symbol;Acc:1311760]
ENSRNOT00000078317.1	1383	1185.42	11730	97.6824	ENSRNOG00000014289.7	Arpc2	actin related protein 2/3 complex, subunit 2 [Source:RGD Symbol;Acc:1305848]
ENSRNOT00000091287.1	8121	7923.42	78364.7	97.6332	ENSRNOG00000058561.1	Srrm2	serine/arginine repetitive matrix 2 [Source:RGD Symbol;Acc:1310163]
ENSRNOT00000007314.6	2271	2073.42	20504	97.6204	ENSRNOG00000005264.6	Sav1	salvador family WW domain containing protein 1 [Source:RGD Symbol;Acc:1307253]
ENSRNOT00000055602.5	4668	4470.42	44197	97.5964	ENSRNOG00000005958.8	Rrbp1	ribosome binding protein 1 [Source:RGD Symbol;Acc:1306536]
ENSRNOT00000090258.1	2661	2463.42	24324.4	97.475	ENSRNOG00000058898.1	Nedd4	NEDD4 E3 ubiquitin protein ligase [Source:RGD Symbol;Acc:3157]
ENSRNOT00000027539.7	1019	821.422	8110	97.464	ENSRNOG00000020317.7	Rab5if	RAB5 interacting factor [Source:RGD Symbol;Acc:1307752]
ENSRNOT00000015852.5	2474	2276.42	22469	97.4363	ENSRNOG00000011849.6	Ndufs1	NADH:ubiquinone oxidoreductase core subunit S1 [Source:RGD Symbol;Acc:1359670]
ENSRNOT00000024248.3	3221	3023.42	29835.6	97.4149	ENSRNOG00000017932.3	St3gal2	ST3 beta-galactoside alpha-2,3-sialyltransferase 2 [Source:RGD Symbol;Acc:68413]
ENSRNOT00000089441.1	2110	1912.42	18842.5	97.2621	ENSRNOG00000033593.5	Osbpl9	oxysterol binding protein-like 9 [Source:RGD Symbol;Acc:1311508]
ENSRNOT00000012400.6	3212	3014.42	29690.4	97.2302	ENSRNOG00000009102.7	Fermt2	fermitin family member 2 [Source:RGD Symbol;Acc:1311799]
ENSRNOT00000071885.2	2942	2744.42	27027	97.2157	ENSRNOG00000049033.2	Racgap1	Rac GTPase-activating protein 1 [Source:RGD Symbol;Acc:1305912]
ENSRNOT00000026040.5	1684	1486.42	14620	97.0946	ENSRNOG00000019047.6	Ola1	Obg-like ATPase 1 [Source:RGD Symbol;Acc:1307982]
ENSRNOT00000007851.5	1909	1711.42	16818	97.0079	ENSRNOG00000005935.5	A3galt2	alpha 1,3-galactosyltransferase 2 [Source:RGD Symbol;Acc:727913]
ENSRNOT00000091994.1	1740	1542.42	15115	96.7372	ENSRNOG00000002983.7	Nfix	nuclear factor I X [Source:RGD Symbol;Acc:69080]
ENSRNOT00000074847.2	2364	2166.42	21211	96.6513	ENSRNOG00000048733.2	Nup62	nucleoporin 62 [Source:RGD Symbol;Acc:619938]
ENSRNOT00000029728.5	2227	2029.42	19867.4	96.6404	ENSRNOG00000021781.5	Camk1	calcium/calmodulin-dependent protein kinase I [Source:RGD Symbol;Acc:629473]
ENSRNOT00000074212.1	4203	4005.42	39111	96.3918	ENSRNOG00000010588.8	Tns2	tensin 2 [Source:RGD Symbol;Acc:1310917]
ENSRNOT00000083188.1	1946	1748.42	17065.5	96.3526	ENSRNOG00000059538.1	Clec2g	C-type lectin domain family 2, member G [Source:RGD Symbol;Acc:1563148]
ENSRNOT00000025380.6	210	61.9765	604.747	96.3245	ENSRNOG00000049442.2	AABR07026317.1
ENSRNOT00000044287.4	5078	4880.42	47576	96.2321	ENSRNOG00000014096.6	Nr3c1	nuclear receptor subfamily 3, group C, member 1 [Source:RGD Symbol;Acc:2741]
ENSRNOT00000049170.5	1899	1701.42	16576	96.1739	ENSRNOG00000028956.5	Mbd3	methyl-CpG binding domain protein 3 [Source:RGD Symbol;Acc:1307389]
ENSRNOT00000040847.3	2889	2691.42	26214	96.1482	ENSRNOG00000033192.3	Osmr	oncostatin M receptor [Source:RGD Symbol;Acc:1302983]
ENSRNOT00000071817.2	683	485.564	4727.92	96.12	ENSRNOG00000051180.1	LOC100911516	coiled-coil-helix-coiled-coil-helix domain-containing protein 2, mitochondrial-like [Source:RGD Symbol;Acc:6492335]
ENSRNOT00000020663.3	1585	1387.42	13509.3	96.1198	ENSRNOG00000015182.6	Ppp2cb	protein phosphatase 2 catalytic subunit beta [Source:RGD Symbol;Acc:3381]
ENSRNOT00000006917.5	1744	1546.42	15045	96.0404	ENSRNOG00000004846.5	Atp6v1c1	ATPase H+ transporting V1 subunit C1 [Source:RGD Symbol;Acc:1311082]
ENSRNOT00000065871.1	3284	3086.42	30021	96.0195	ENSRNOG00000010237.6	Map7d1	MAP7 domain containing 1 [Source:RGD Symbol;Acc:1597986]
ENSRNOT00000004938.5	1037	839.422	8158	95.9385	ENSRNOG00000003706.5	Ufc1	ubiquitin-fold modifier conjugating enzyme 1 [Source:RGD Symbol;Acc:1303313]
ENSRNOT00000039836.4	2147	1949.42	18931	95.8644	ENSRNOG00000028103.5	Psmd3	proteasome 26S subunit, non-ATPase 3 [Source:RGD Symbol;Acc:1311470]
ENSRNOT00000021358.2	1393	1195.42	11606.5	95.8449	ENSRNOG00000015936.2	LOC108349548	guanine nucleotide-binding protein G(I)/G(S)/G(O) subunit gamma-5 [Source:RGD Symbol;Acc:11485321]
ENSRNOT00000080109.1	1886	1688.42	16368.2	95.6996	ENSRNOG00000052990.1	Cers5	ceramide synthase 5 [Source:RGD Symbol;Acc:1311597]
ENSRNOT00000013052.6	2047	1849.42	17924	95.6728	ENSRNOG00000009414.6	Creld1	cysteine-rich with EGF-like domains 1 [Source:RGD Symbol;Acc:1309412]
ENSRNOT00000005677.3	1952	1754.42	17002	95.6656	ENSRNOG00000004111.3	Soat1	sterol O-acyltransferase 1 [Source:RGD Symbol;Acc:621641]
ENSRNOT00000082846.1	1606	1408.42	13645	95.638	ENSRNOG00000058539.1	Ccnb1	cyclin B1 [Source:RGD Symbol;Acc:2291]
ENSRNOT00000077053.2	3438	3240.42	31338	95.4685	ENSRNOG00000014371.8	Cdh13	cadherin 13 [Source:RGD Symbol;Acc:619745]
ENSRNOT00000015186.5	1482	1284.42	12418	95.4407	ENSRNOG00000010958.5	Prdx3	peroxiredoxin 3 [Source:RGD Symbol;Acc:620040]
ENSRNOT00000005719.7	600	402.951	3891.12	95.326	ENSRNOG00000004245.7	Mgst3	microsomal glutathione S-transferase 3 [Source:RGD Symbol;Acc:1306373]
ENSRNOT00000020581.3	934	736.422	7084.32	94.9645	ENSRNOG00000015202.3	Dnajc5	DnaJ heat shock protein family (Hsp40) member C5 [Source:RGD Symbol;Acc:620516]
ENSRNOT00000092112.1	760	562.481	5410	94.9464	ENSRNOG00000016733.4	Rab13	RAB13, member RAS oncogene family [Source:RGD Symbol;Acc:620880]
ENSRNOT00000027809.7	950	752.422	7236	94.9351	ENSRNOG00000037247.4	Rras	RAS related [Source:RGD Symbol;Acc:1311443]
ENSRNOT00000092663.1	1917	1719.42	16535.2	94.9326	ENSRNOG00000000520.8	Srsf3	serine and arginine rich splicing factor 3 [Source:RGD Symbol;Acc:1309233]
ENSRNOT00000083935.1	2303	2105.42	20239.5	94.8965	ENSRNOG00000036833.4	Zfp385a	zinc finger protein 385A [Source:RGD Symbol;Acc:1593784]
ENSRNOT00000020885.5	1713	1515.42	14567	94.8913	ENSRNOG00000015068.5	Il11ra1	interleukin 11 receptor subunit alpha 1 [Source:RGD Symbol;Acc:621332]
ENSRNOT00000019740.5	595	398.007	3823.1	94.8231	ENSRNOG00000014581.5	Trappc2l	trafficking protein particle complex 2-like [Source:RGD Symbol;Acc:1304906]
ENSRNOT00000072411.2	5076	4878.42	46751.3	94.6028	ENSRNOG00000009037.7	Sulf1	sulfatase 1 [Source:RGD Symbol;Acc:708554]
ENSRNOT00000010197.5	1632	1434.42	13738.9	94.5507	ENSRNOG00000007648.5	Rab11b	RAB11B, member RAS oncogene family [Source:RGD Symbol;Acc:68369]
ENSRNOT00000004783.6	1575	1377.42	13183	94.4793	ENSRNOG00000003583.6	Smyd2	SET and MYND domain containing 2 [Source:RGD Symbol;Acc:727785]
ENSRNOT00000000737.7	5947	5749.42	54954	94.355	ENSRNOG00000000599.7	Lama4	laminin subunit alpha 4 [Source:RGD Symbol;Acc:1560062]
ENSRNOT00000082341.1	1803	1605.42	15335	94.294	ENSRNOG00000055524.1	Trip10	thyroid hormone receptor interactor 10 [Source:RGD Symbol;Acc:621145]
ENSRNOT00000078752.1	2145	1947.42	18572	94.1431	ENSRNOG00000060479.1	Sp3	Sp3 transcription factor [Source:RGD Symbol;Acc:1583765]
ENSRNOT00000087065.1	1441	1243.42	11854.4	94.1132	ENSRNOG00000020643.7	Bub3	BUB3 mitotic checkpoint protein [Source:RGD Symbol;Acc:1306654]
ENSRNOT00000020144.8	2585	2387.42	22753.4	94.082	ENSRNOG00000014835.8	Il1rl1	interleukin 1 receptor-like 1 [Source:RGD Symbol;Acc:2894]
ENSRNOT00000021286.5	2171	1973.42	18807	94.0782	ENSRNOG00000015753.6	Epn1	Epsin 1 [Source:RGD Symbol;Acc:619772]
ENSRNOT00000087062.1	3799	3601.42	34310	94.0451	ENSRNOG00000051854.1	Enpep	glutamyl aminopeptidase [Source:RGD Symbol;Acc:621228]
ENSRNOT00000008164.4	1707	1509.42	14377	94.0258	ENSRNOG00000005988.4	Arl8a	ADP-ribosylation factor like GTPase 8A [Source:RGD Symbol;Acc:1565940]
ENSRNOT00000084320.1	1902	1704.42	16229.3	93.9967	ENSRNOG00000008193.7	Cr1l	complement C3b/C4b receptor 1 like [Source:RGD Symbol;Acc:2399]
ENSRNOT00000023526.5	748	550.492	5237	93.9119	ENSRNOG00000017446.5	Ndufs8	NADH:ubiquinone oxidoreductase core subunit S8 [Source:RGD Symbol;Acc:1309436]
ENSRNOT00000061070.4	2526	2328.42	22142	93.8739	ENSRNOG00000004726.7	Mapkapk2	MAPK activated protein kinase 2 [Source:RGD Symbol;Acc:631362]
ENSRNOT00000042643.2	380	193.24	1831.99	93.5873	ENSRNOG00000029668.4	Wfdc21	WAP four-disulfide core domain 21 [Source:RGD Symbol;Acc:1303147]
ENSRNOT00000026646.5	1035	837.422	7936.97	93.5621	ENSRNOG00000019634.9	Eif4e2	eukaryotic translation initiation factor 4E family member 2 [Source:RGD Symbol;Acc:1307790]
ENSRNOT00000074695.2	2001	1803.42	17072	93.4494	ENSRNOG00000049683.2	Sh3gl1	SH3 domain containing GRB2 like 1, endophilin A2 [Source:RGD Symbol;Acc:708456]
ENSRNOT00000062055.5	4619	4421.42	41843.5	93.4235	ENSRNOG00000010286.8	Cast	calpastatin [Source:RGD Symbol;Acc:2278]
ENSRNOT00000009207.5	607	409.878	3878	93.3991	ENSRNOG00000006898.5	Mrps16	mitochondrial ribosomal protein S16 [Source:RGD Symbol;Acc:1582995]
ENSRNOT00000058190.3	384	196.737	1861	93.3793	ENSRNOG00000038218.3	Ndufc1	NADH:ubiquinone oxidoreductase subunit C1 [Source:RGD Symbol;Acc:1586362]
ENSRNOT00000092432.1	744	546.503	5159.42	93.1961	ENSRNOG00000001009.7	Bri3	brain protein I3 [Source:RGD Symbol;Acc:1309187]
ENSRNOT00000024884.6	1109	911.422	8594	93.082	ENSRNOG00000018410.6	Nfu1	NFU1 iron-sulfur cluster scaffold [Source:RGD Symbol;Acc:1307823]
ENSRNOT00000015598.3	2262	2064.42	19424	92.8816	ENSRNOG00000011302.3	Rab11a	RAB11a, member RAS oncogene family [Source:RGD Symbol;Acc:619762]
ENSRNOT00000081497.1	2281	2083.42	19588.7	92.8149	ENSRNOG00000016012.7	Spats2l	spermatogenesis associated, serine-rich 2-like [Source:RGD Symbol;Acc:1309930]
ENSRNOT00000088525.1	2239	2041.42	19191.2	92.8023	ENSRNOG00000025418.6	Armc9	armadillo repeat containing 9 [Source:RGD Symbol;Acc:1305615]
ENSRNOT00000008509.6	3247	3049.42	28665.5	92.7967	ENSRNOG00000005736.6	Eif1ax	eukaryotic translation initiation factor 1A, X-linked [Source:RGD Symbol;Acc:1560198]
ENSRNOT00000041493.3	4083	3885.42	36523	92.7936	ENSRNOG00000031364.3	Kif1c	kinesin family member 1C [Source:RGD Symbol;Acc:70928]
ENSRNOT00000009866.5	839	641.422	6029.07	92.789	ENSRNOG00000007512.5	Srp14	signal recognition particle 14 [Source:RGD Symbol;Acc:1308506]
ENSRNOT00000015495.5	3961	3763.42	35331	92.675	ENSRNOG00000011339.6	Slk	STE20-like kinase [Source:RGD Symbol;Acc:3780]
ENSRNOT00000012004.4	2653	2455.42	23045	92.6489	ENSRNOG00000008927.4	Hbp1	HMG-box transcription factor 1 [Source:RGD Symbol;Acc:620444]
ENSRNOT00000075444.2	2168	1970.42	18485.4	92.6104	ENSRNOG00000049681.2	AABR07031491.2
ENSRNOT00000060444.1	2919	2721.42	25523	92.5818	ENSRNOG00000001253.6	Eif3b	eukaryotic translation initiation factor 3, subunit B [Source:RGD Symbol;Acc:1309018]
ENSRNOT00000028758.5	1533	1335.42	12517	92.5276	ENSRNOG00000021181.5	Sf3b4	splicing factor 3b, subunit 4 [Source:RGD Symbol;Acc:1309667]
ENSRNOT00000056405.2	2504	2306.42	21613.2	92.506	ENSRNOG00000004742.5	Chp1	calcineurin-like EF-hand protein 1 [Source:RGD Symbol;Acc:620447]
ENSRNOT00000092945.1	3562	3364.42	31521.3	92.4874	ENSRNOG00000018322.8	Picalm	phosphatidylinositol binding clathrin assembly protein [Source:RGD Symbol;Acc:621054]
ENSRNOT00000085344.1	5589	5391.42	50509.3	92.4821	ENSRNOG00000053047.1	Top2a	DNA topoisomerase II alpha [Source:RGD Symbol;Acc:62048]
ENSRNOT00000015869.8	1785	1587.42	14853.8	92.371	ENSRNOG00000011489.8	R3hdm4	R3H domain containing 4 [Source:RGD Symbol;Acc:1307067]
ENSRNOT00000073049.2	1962	1764.42	16500.9	92.3198	ENSRNOG00000047699.2	Snai2	snail family transcriptional repressor 2 [Source:RGD Symbol;Acc:3722]
ENSRNOT00000000146.7	1521	1323.42	12369	92.2626	ENSRNOG00000000133.7	Txndc15	thioredoxin domain containing 15 [Source:RGD Symbol;Acc:1304696]
ENSRNOT00000020748.6	1743	1545.42	14437.4	92.2212	ENSRNOG00000014621.7	Rab8a	RAB8A, member RAS oncogene family [Source:RGD Symbol;Acc:621144]
ENSRNOT00000013516.5	2619	2421.42	22621	92.2212	ENSRNOG00000009867.5	Tgfb3	transforming growth factor, beta 3 [Source:RGD Symbol;Acc:3851]
ENSRNOT00000016288.5	3803	3605.42	33679	92.2131	ENSRNOG00000011953.5	Supt16h	SPT16 homolog, facilitates chromatin remodeling subunit [Source:RGD Symbol;Acc:1310032]
ENSRNOT00000007484.5	2763	2565.42	23960	92.1972	ENSRNOG00000005551.6	Derl1	derlin 1 [Source:RGD Symbol;Acc:1311835]
ENSRNOT00000071439.1	750	552.492	5154.93	92.1056	ENSRNOG00000050669.2	LOC100911515	triosephosphate isomerase-like [Source:RGD Symbol;Acc:6492323]
ENSRNOT00000017086.7	1371	1173.42	10947.2	92.0955	ENSRNOG00000012594.7	Sugt1	SGT1 homolog, MIS12 kinetochore complex assembly cochaperone [Source:RGD Symbol;Acc:1307550]
ENSRNOT00000048767.3	1830	1632.42	15227	92.0813	ENSRNOG00000029971.3	Mt-nd5	mitochondrially encoded NADH dehydrogenase 5 [Source:RGD Symbol;Acc:620560]
ENSRNOT00000073683.2	1721	1523.42	14199	92.0083	ENSRNOG00000047134.2	Gtf2f1	general transcription factor IIF subunit 1 [Source:RGD Symbol;Acc:1359646]
ENSRNOT00000048429.1	318	140.754	1309.37	91.8312	ENSRNOG00000032885.1	LOC100363502	cytochrome c, somatic-like [Source:RGD Symbol;Acc:2322845]
ENSRNOT00000076585.2	1854	1656.42	15400.2	91.7791	ENSRNOG00000015787.8	P3h4	prolyl 3-hydroxylase family member 4 (non-enzymatic) [Source:RGD Symbol;Acc:620767]
ENSRNOT00000074392.2	633	435.676	4049	91.7431	ENSRNOG00000050552.2	AABR07053516.1
ENSRNOT00000038807.5	1890	1692.42	15717	91.6749	ENSRNOG00000028017.5	Tmem109	transmembrane protein 109 [Source:RGD Symbol;Acc:1359538]
ENSRNOT00000089814.1	2304	2106.42	19533.5	91.5429	ENSRNOG00000056870.1	Gdi1	GDP dissociation inhibitor 1 [Source:RGD Symbol;Acc:2676]
ENSRNOT00000010020.4	1728	1530.42	14192	91.5423	ENSRNOG00000007412.4	Dok1	docking protein 1 [Source:RGD Symbol;Acc:1309499]
ENSRNOT00000078279.1	3213	3015.42	27943.9	91.4804	ENSRNOG00000019077.5	Lipa	lipase A, lysosomal acid type [Source:RGD Symbol;Acc:3008]
ENSRNOT00000012533.6	3258	3060.42	28357	91.4679	ENSRNOG00000009006.6	Ccdc47	coiled-coil domain containing 47 [Source:RGD Symbol;Acc:1308813]
ENSRNOT00000036151.4	1847	1649.42	15271.4	91.3978	ENSRNOG00000028415.4	Cdc20	cell division cycle 20 [Source:RGD Symbol;Acc:620477]
ENSRNOT00000048998.3	1592	1394.42	12909.5	91.3915	ENSRNOG00000019425.5	Gabarapl2	GABA type A receptor associated protein like 2 [Source:RGD Symbol;Acc:620510]
ENSRNOT00000019556.5	1996	1798.42	16635.6	91.3141	ENSRNOG00000039528.3	Fam32a	family with sequence similarity 32, member A [Source:RGD Symbol;Acc:1561287]
ENSRNOT00000074626.2	3422	3224.42	29798	91.2273	ENSRNOG00000048043.2	F2r	coagulation factor II (thrombin) receptor [Source:RGD Symbol;Acc:2586]
ENSRNOT00000057475.4	1283	1085.42	10029.3	91.2143	ENSRNOG00000045539.2	Dusp11	dual specificity phosphatase 11 [Source:RGD Symbol;Acc:1307038]
ENSRNOT00000034924.5	1752	1554.42	14348.4	91.1221	ENSRNOG00000012237.6	Rdx	radixin [Source:RGD Symbol;Acc:1359472]
ENSRNOT00000015099.7	2688	2490.42	22957	90.998	ENSRNOG00000011295.7	Anapc2	anaphase promoting complex subunit 2 [Source:RGD Symbol;Acc:1305546]
ENSRNOT00000003926.6	951	753.422	6944	90.9832	ENSRNOG00000002928.6	Guk1	guanylate kinase 1 [Source:RGD Symbol;Acc:1309638]
ENSRNOT00000074286.3	522	326.229	3003.59	90.8881	ENSRNOG00000042915.4	Mxra7	matrix remodeling associated 7 [Source:RGD Symbol;Acc:1594666]
ENSRNOT00000067663.2	5241	5043.42	46432	90.8828	ENSRNOG00000031475.4	Col16a1	collagen type XVI alpha 1 chain [Source:RGD Symbol;Acc:1310982]
ENSRNOT00000005601.4	2241	2043.42	18805.4	90.8479	ENSRNOG00000013141.6	Eno2	enolase 2 [Source:RGD Symbol;Acc:2554]
ENSRNOT00000047836.4	2341	2143.42	19722	90.8308	ENSRNOG00000032463.4	Rap1a	RAP1A, member of RAS oncogene family [Source:RGD Symbol;Acc:1359694]
ENSRNOT00000066892.4	816	618.422	5689.54	90.8202	ENSRNOG00000000665.7	Pitpnb	phosphatidylinositol transfer protein, beta [Source:RGD Symbol;Acc:620143]
ENSRNOT00000006223.5	1221	1023.42	9414.69	90.8115	ENSRNOG00000004474.5	Klhdc2	kelch domain containing 2 [Source:RGD Symbol;Acc:1306504]
ENSRNOT00000068606.2	2213	2015.42	18540	90.8099	ENSRNOG00000029209.4	Rnf13	ring finger protein 13 [Source:RGD Symbol;Acc:1594062]
ENSRNOT00000021483.4	2096	1898.42	17462	90.801	ENSRNOG00000016001.4	Chmp1a	charged multivesicular body protein 1A [Source:RGD Symbol;Acc:1311083]
ENSRNOT00000084616.1	614	416.82	3833.26	90.784	ENSRNOG00000052279.1	LOC103692169	39S ribosomal protein L53, mitochondrial [Source:RGD Symbol;Acc:9457461]
ENSRNOT00000076164.2	3319	3121.42	28685.1	90.7181	ENSRNOG00000051170.2	Ddx17	DEAD-box helicase 17 [Source:RGD Symbol;Acc:1304945]
ENSRNOT00000037710.4	2412	2214.42	20347	90.7047	ENSRNOG00000022623.4	Ttll12	tubulin tyrosine ligase like 12 [Source:RGD Symbol;Acc:1305319]
ENSRNOT00000085120.1	2155	1957.42	17982.5	90.6893	ENSRNOG00000032878.3	Cxxc5	CXXC finger protein 5 [Source:RGD Symbol;Acc:1359466]
ENSRNOT00000013864.6	2763	2565.42	23561	90.662	ENSRNOG00000010370.7	Tnip1	TNFAIP3 interacting protein 1 [Source:RGD Symbol;Acc:1309380]
ENSRNOT00000019351.5	2148	1950.42	17887	90.5313	ENSRNOG00000013774.5	Lmnb1	lamin B1 [Source:RGD Symbol;Acc:620522]
ENSRNOT00000075966.1	1187	989.422	9067.22	90.4654	ENSRNOG00000048441.3	Wdr82	WD repeat domain 82 [Source:RGD Symbol;Acc:1584269]
ENSRNOT00000025104.6	3371	3173.42	29071.6	90.4339	ENSRNOG00000018176.7	Rab6a	RAB6A, member RAS oncogene family [Source:RGD Symbol;Acc:619737]
ENSRNOT00000083560.1	2701	2503.42	22933	90.4308	ENSRNOG00000054176.1	LOC103692171	mannosyl-oligosaccharide glucosidase [Source:RGD Symbol;Acc:9236907]
ENSRNOT00000071917.2	1008	810.422	7422	90.4064	ENSRNOG00000046330.2	AABR07029581.1
ENSRNOT00000016520.6	1679	1481.42	13558	90.3455	ENSRNOG00000011952.6	Samm50	SAMM50 sorting and assembly machinery component [Source:RGD Symbol;Acc:1303219]
ENSRNOT00000005125.6	2179	1981.42	18103.3	90.1927	ENSRNOG00000003563.6	Blmh	bleomycin hydrolase [Source:RGD Symbol;Acc:1304668]
ENSRNOT00000085995.1	2330	2132.42	19461	90.0913	ENSRNOG00000006695.7	Rbck1	RANBP2-type and C3HC4-type zinc finger containing 1 [Source:RGD Symbol;Acc:708404]
ENSRNOT00000020020.5	804	606.458	5532.49	90.0553	ENSRNOG00000014890.5	Mrpl43	mitochondrial ribosomal protein L43 [Source:RGD Symbol;Acc:1307593]
ENSRNOT00000015553.5	2737	2539.42	23163	90.0429	ENSRNOG00000010721.5	Dlgap5	DLG associated protein 5 [Source:RGD Symbol;Acc:1311247]
ENSRNOT00000026564.6	3734	3536.42	32254	90.0345	ENSRNOG00000019582.7	Mthfd1l	methylenetetrahydrofolate dehydrogenase (NADP+ dependent) 1-like [Source:RGD Symbol;Acc:1307311]
ENSRNOT00000085311.1	1538	1340.42	12223	90.0173	ENSRNOG00000016452.7	Creb3	cAMP responsive element binding protein 3 [Source:RGD Symbol;Acc:1308831]
ENSRNOT00000040165.4	1983	1785.42	16262	89.913	ENSRNOG00000030880.4	Hs6st2	heparan sulfate 6-O-sulfotransferase 2 [Source:RGD Symbol;Acc:1564397]
ENSRNOT00000014787.5	1095	897.422	8169.09	89.8601	ENSRNOG00000011119.5	Spin1	spindlin 1 [Source:RGD Symbol;Acc:1306210]
ENSRNOT00000076695.2	1323	1125.42	10242.7	89.8437	ENSRNOG00000051232.2	Gbe1	1,4-alpha-glucan branching enzyme 1 [Source:RGD Symbol;Acc:1309968]
ENSRNOT00000091494.1	1387	1189.42	10823	89.8259	ENSRNOG00000060597.1	Syf2	SYF2 pre-mRNA-splicing factor [Source:RGD Symbol;Acc:621592]
ENSRNOT00000024975.4	2213	2015.42	18330	89.7813	ENSRNOG00000018325.4	Cnppd1	cyclin Pas1/PHO80 domain containing 1 [Source:RGD Symbol;Acc:735175]
ENSRNOT00000093338.1	203	57.6719	524.364	89.7548	ENSRNOG00000051382.2	Ntan1	N-terminal asparagine amidase [Source:RGD Symbol;Acc:1305160]
ENSRNOT00000043754.4	1085	887.422	8058.62	89.6437	ENSRNOG00000051179.2	Vps25	vacuolar protein sorting 25 homolog [Source:RGD Symbol;Acc:1584685]
ENSRNOT00000047750.4	1244	1046.42	9499.38	89.6144	ENSRNOG00000033057.4	AABR07025010.1
ENSRNOT00000087534.1	976	778.422	7064.38	89.5877	ENSRNOG00000018176.7	Rab6a	RAB6A, member RAS oncogene family [Source:RGD Symbol;Acc:619737]
ENSRNOT00000003046.6	1639	1441.42	13053	89.3941	ENSRNOG00000023650.5	Cops4	COP9 signalosome subunit 4 [Source:RGD Symbol;Acc:1302952]
ENSRNOT00000006408.6	3855	3657.42	33106.5	89.3568	ENSRNOG00000004763.7	Sirpa	signal-regulatory protein alpha [Source:RGD Symbol;Acc:3449]
ENSRNOT00000025559.5	1842	1644.42	14883	89.3443	ENSRNOG00000018796.5	Herpud1	homocysteine inducible ER protein with ubiquitin like domain 1 [Source:RGD Symbol;Acc:620818]
ENSRNOT00000024473.5	879	681.422	6166	89.3258	ENSRNOG00000018186.5	Lamtor5	late endosomal/lysosomal adaptor, MAPK and MTOR activator 5 [Source:RGD Symbol;Acc:1305005]
ENSRNOT00000004385.4	1330	1132.42	10244	89.2999	ENSRNOG00000003253.4	Qdpr	quinoid dihydropteridine reductase [Source:RGD Symbol;Acc:619915]
ENSRNOT00000058700.2	969	771.422	6977.92	89.2943	ENSRNOG00000030807.3	LOC100912427	nuclease-sensitive element-binding protein 1-like [Source:RGD Symbol;Acc:6486912]
ENSRNOT00000084060.1	2345	2147.42	19400	89.1813	ENSRNOG00000055281.1	Dcbld2	discoidin, CUB and LCCL domain containing 2 [Source:RGD Symbol;Acc:620543]
ENSRNOT00000026297.6	1548	1350.42	12181.2	89.0453	ENSRNOG00000042983.2	Nudt21	nudix hydrolase 21 [Source:RGD Symbol;Acc:1305766]
ENSRNOT00000087382.1	1473	1275.42	11504.6	89.0442	ENSRNOG00000056024.1	Bnip2	BCL2 interacting protein 2 [Source:RGD Symbol;Acc:1308944]
ENSRNOT00000059467.4	412	221.988	2002	89.0277	ENSRNOG00000038902.4	Rbis	ribosomal biogenesis factor [Source:RGD Symbol;Acc:1565641]
ENSRNOT00000014271.6	2362	2164.42	19519.6	89.0266	ENSRNOG00000010630.6	Prcp	prolylcarboxypeptidase [Source:RGD Symbol;Acc:1307842]
ENSRNOT00000001261.6	950	752.422	6780	88.9524	ENSRNOG00000000954.7	Polr1d	RNA polymerase I and III subunit D [Source:RGD Symbol;Acc:1564358]
ENSRNOT00000083423.1	3079	2881.42	25956	88.9243	ENSRNOG00000051498.1	Prpf6	pre-mRNA processing factor 6 [Source:RGD Symbol;Acc:1307103]
ENSRNOT00000020335.6	1232	1034.42	9317	88.9136	ENSRNOG00000015072.6	Ptgr1	prostaglandin reductase 1 [Source:RGD Symbol;Acc:621195]
ENSRNOT00000020284.6	723	525.514	4732.93	88.9068	ENSRNOG00000014624.6	Selenok	selenoprotein K [Source:RGD Symbol;Acc:1303129]
ENSRNOT00000078326.1	2305	2107.42	18979.7	88.9055	ENSRNOG00000005261.7	Fbxl5	F-box and leucine-rich repeat protein 5 [Source:RGD Symbol;Acc:1306887]
ENSRNOT00000043451.5	3913	3715.42	33410.6	88.77	ENSRNOG00000033280.6	Pam	peptidylglycine alpha-amidating monooxygenase [Source:RGD Symbol;Acc:3252]
ENSRNOT00000093740.1	1628	1430.42	12858.6	88.7403	ENSRNOG00000032034.7	Supt5h	SPT5 homolog, DSIF elongation factor subunit [Source:RGD Symbol;Acc:1563807]
ENSRNOT00000026755.5	943	745.422	6696	88.6753	ENSRNOG00000019721.5	Ypel3	yippee-like 3 [Source:RGD Symbol;Acc:1564579]
ENSRNOT00000010893.6	2358	2160.42	19386	88.5806	ENSRNOG00000022323.5	Tcea1	transcription elongation factor A1 [Source:RGD Symbol;Acc:1309880]
ENSRNOT00000031331.4	6452	6254.42	56107.6	88.5573	ENSRNOG00000012094.6	Ltbp2	latent transforming growth factor beta binding protein 2 [Source:RGD Symbol;Acc:68380]
ENSRNOT00000022437.6	1811	1613.42	14470	88.534	ENSRNOG00000016459.6	Eif3j	eukaryotic translation initiation factor 3, subunit J [Source:RGD Symbol;Acc:1593338]
ENSRNOT00000072973.2	1112	914.422	8200	88.5231	ENSRNOG00000050401.2	Vbp1	VHL binding protein 1 [Source:RGD Symbol;Acc:1590535]
ENSRNOT00000046746.3	2945	2747.42	24636.5	88.5205	ENSRNOG00000018524.6	Ezr	ezrin [Source:RGD Symbol;Acc:621161]
ENSRNOT00000009549.2	934	736.422	6602.1	88.5004	ENSRNOG00000007221.2	Dut	deoxyuridine triphosphatase [Source:RGD Symbol;Acc:620849]
ENSRNOT00000007947.7	1722	1524.42	13663	88.477	ENSRNOG00000005998.7	Smoc1	SPARC related modular calcium binding 1 [Source:RGD Symbol;Acc:1303126]
ENSRNOT00000055464.4	914	716.422	6421	88.4756	ENSRNOG00000009225.7	Copz2	coatomer protein complex, subunit zeta 2 [Source:RGD Symbol;Acc:1306948]
ENSRNOT00000015971.7	2632	2434.42	21793	88.3711	ENSRNOG00000011910.7	Hnrnpr	heterogeneous nuclear ribonucleoprotein R [Source:RGD Symbol;Acc:631348]
ENSRNOT00000013613.7	3430	3232.42	28933.9	88.3627	ENSRNOG00000009088.7	Txnrd1	thioredoxin reductase 1 [Source:RGD Symbol;Acc:61959]
ENSRNOT00000086251.1	585	388.118	3469.28	88.2399	ENSRNOG00000010584.7	Tmem123	transmembrane protein 123 [Source:RGD Symbol;Acc:1305625]
ENSRNOT00000018864.5	2107	1909.42	17067	88.2358	ENSRNOG00000013783.5	Efhd2	EF-hand domain family, member D2 [Source:RGD Symbol;Acc:1307585]
ENSRNOT00000004206.7	384	196.737	1758	88.2111	ENSRNOG00000003150.7	Mpc2	mitochondrial pyruvate carrier 2 [Source:RGD Symbol;Acc:1563422]
ENSRNOT00000015327.6	924	726.422	6490.98	88.2086	ENSRNOG00000011441.7	Tpd52	tumor protein D52 [Source:RGD Symbol;Acc:1306767]
ENSRNOT00000020544.7	1349	1151.42	10286	88.1864	ENSRNOG00000015233.7	Etfa	electron transfer flavoprotein subunit alpha [Source:RGD Symbol;Acc:628747]
ENSRNOT00000003552.5	1047	849.422	7587	88.1731	ENSRNOG00000002553.5	Smim14	small integral membrane protein 14 [Source:RGD Symbol;Acc:1311122]
ENSRNOT00000039067.3	587	390.087	3484	88.1671	ENSRNOG00000026528.3	Mrps33	mitochondrial ribosomal protein S33 [Source:RGD Symbol;Acc:1309217]
ENSRNOT00000010028.7	2175	1977.42	17658	88.1519	ENSRNOG00000007604.7	Igsf8	immunoglobulin superfamily, member 8 [Source:RGD Symbol;Acc:1311500]
ENSRNOT00000079785.1	695	497.535	4442.32	88.1407	ENSRNOG00000008676.6	Emp1	epithelial membrane protein 1 [Source:RGD Symbol;Acc:2552]
ENSRNOT00000024020.5	3192	2994.42	26732	88.1268	ENSRNOG00000017612.5	Vps35	VPS35 retromer complex component [Source:RGD Symbol;Acc:1589784]
ENSRNOT00000091731.1	825	627.422	5600.56	88.1174	ENSRNOG00000000521.4	Cdkn1a	cyclin-dependent kinase inhibitor 1A [Source:RGD Symbol;Acc:69328]
ENSRNOT00000073258.2	816	618.422	5513	88.002	ENSRNOG00000045698.2	Lin7c	lin-7 homolog C, crumbs cell polarity complex component [Source:RGD Symbol;Acc:621164]
ENSRNOT00000002484.6	1879	1681.42	14969.8	87.888	ENSRNOG00000001815.6	Eif4a2	eukaryotic translation initiation factor 4A2 [Source:RGD Symbol;Acc:1309225]
ENSRNOT00000050535.5	855	657.422	5842.33	87.7267	ENSRNOG00000034233.6	Fyttd1	forty-two-three domain containing 1 [Source:RGD Symbol;Acc:1306899]
ENSRNOT00000019844.6	1783	1585.42	14088	87.7192	ENSRNOG00000014426.7	Lox	lysyl oxidase [Source:RGD Symbol;Acc:3015]
ENSRNOT00000007595.7	1639	1441.42	12791.4	87.6025	ENSRNOG00000004973.7	Ppp2r5c	protein phosphatase 2, regulatory subunit B', gamma [Source:RGD Symbol;Acc:1585097]
ENSRNOT00000078434.1	1927	1729.42	15324.2	87.4717	ENSRNOG00000001964.7	Cd47	Cd47 molecule [Source:RGD Symbol;Acc:2308]
ENSRNOT00000031045.5	4102	3904.42	34551	87.3562	ENSRNOG00000023095.5	Npepps	aminopeptidase puromycin sensitive [Source:RGD Symbol;Acc:619962]
ENSRNOT00000066546.1	8861	8663.42	76560.9	87.2383	ENSRNOG00000009470.7	Flnb	filamin B [Source:RGD Symbol;Acc:1311915]
ENSRNOT00000004351.4	1492	1294.42	11421	87.0999	ENSRNOG00000003232.4	Slc9a3r1	SLC9A3 regulator 1 [Source:RGD Symbol;Acc:708538]
ENSRNOT00000002450.6	1686	1488.42	13121	87.0223	ENSRNOG00000001797.6	Umps	uridine monophosphate synthetase [Source:RGD Symbol;Acc:1311908]
ENSRNOT00000077445.1	2698	2500.42	22032	86.9822	ENSRNOG00000053932.1	Ddx6	DEAD-box helicase 6 [Source:RGD Symbol;Acc:1564560]
ENSRNOT00000034096.6	3849	3651.42	32134	86.8745	ENSRNOG00000024089.6	Fndc3b	fibronectin type III domain containing 3B [Source:RGD Symbol;Acc:1311673]
ENSRNOT00000005347.5	2579	2381.42	20949	86.8393	ENSRNOG00000003990.6	Grb2	growth factor receptor bound protein 2 [Source:RGD Symbol;Acc:619758]
ENSRNOT00000014397.7	759	561.481	4936.89	86.7976	ENSRNOG00000010732.7	RGD1561590	similar to SAP18 [Source:RGD Symbol;Acc:1561590]
ENSRNOT00000079891.1	4425	4227.42	37165	86.7857	ENSRNOG00000060614.1	Pxdn	peroxidasin [Source:RGD Symbol;Acc:1560694]
ENSRNOT00000016297.6	1262	1064.42	9350.51	86.7183	ENSRNOG00000012121.6	Sdf2	stromal cell derived factor 2 [Source:RGD Symbol;Acc:1307274]
ENSRNOT00000077270.1	2597	2399.42	21071	86.6899	ENSRNOG00000011441.7	Tpd52	tumor protein D52 [Source:RGD Symbol;Acc:1306767]
ENSRNOT00000024517.6	1615	1417.42	12443	86.6592	ENSRNOG00000018117.6	Ndufv1	NADH:ubiquinone oxidoreductase core subunit V1 [Source:RGD Symbol;Acc:1359247]
ENSRNOT00000090499.1	2291	2093.42	18372	86.6342	ENSRNOG00000059461.1	B4galt1	beta-1,4-galactosyltransferase 1 [Source:RGD Symbol;Acc:620900]
ENSRNOT00000088097.1	2148	1950.42	17109.7	86.5972	ENSRNOG00000055853.1	Gorasp2	golgi reassembly stacking protein 2 [Source:RGD Symbol;Acc:619911]
ENSRNOT00000030934.6	1774	1576.42	13825	86.573	ENSRNOG00000025768.6	Clk1	CDC-like kinase 1 [Source:RGD Symbol;Acc:1311469]
ENSRNOT00000012665.5	2966	2768.42	24248	86.4636	ENSRNOG00000009313.5	Lrpap1	LDL receptor related protein associated protein 1 [Source:RGD Symbol;Acc:620700]
ENSRNOT00000015931.6	2715	2517.42	22031	86.3909	ENSRNOG00000011891.6	Atp6v1b2	ATPase H+ transporting V1 subunit B2 [Source:RGD Symbol;Acc:620284]
ENSRNOT00000037030.5	1029	831.422	7275.65	86.3854	ENSRNOG00000024967.5	Uqcrb	ubiquinol-cytochrome c reductase binding protein [Source:RGD Symbol;Acc:1311971]
ENSRNOT00000060062.4	474	279.975	2450	86.3847	ENSRNOG00000003385.7	Glrx2	glutaredoxin 2 [Source:RGD Symbol;Acc:1307950]
ENSRNOT00000012715.4	3549	3351.42	29327	86.383	ENSRNOG00000008797.7	Tmpo	thymopoietin [Source:RGD Symbol;Acc:3875]
ENSRNOT00000073599.3	636	438.676	3835.37	86.3084	ENSRNOG00000045647.3	Hax1	HCLS1 associated protein X-1 [Source:RGD Symbol;Acc:727960]
ENSRNOT00000012610.5	4067	3869.42	33813.7	86.2653	ENSRNOG00000009037.7	Sulf1	sulfatase 1 [Source:RGD Symbol;Acc:708554]
ENSRNOT00000033196.3	3045	2847.42	24882	86.2627	ENSRNOG00000006302.4	Gclc	glutamate-cysteine ligase, catalytic subunit [Source:RGD Symbol;Acc:619868]
ENSRNOT00000006109.4	2015	1817.42	15876	86.2333	ENSRNOG00000004610.4	Lum	lumican [Source:RGD Symbol;Acc:620984]
ENSRNOT00000010243.5	1281	1083.42	9456.06	86.1593	ENSRNOG00000033434.5	Casp12	caspase 12 [Source:RGD Symbol;Acc:621758]
ENSRNOT00000037890.4	1113	915.422	7989.19	86.1532	ENSRNOG00000027408.4	Ppid	peptidylprolyl isomerase D [Source:RGD Symbol;Acc:1303174]
ENSRNOT00000014104.7	2635	2437.42	21270.9	86.1481	ENSRNOG00000009681.8	Flot2	flotillin 2 [Source:RGD Symbol;Acc:70993]
ENSRNOT00000090728.1	907	709.422	6186	86.0785	ENSRNOG00000053397.1	Fmr1nb	FMR1 neighbor [Source:RGD Symbol;Acc:1564059]
ENSRNOT00000088481.1	2844	2646.42	23042.1	85.9513	ENSRNOG00000008165.5	Tpx2	TPX2, microtubule nucleation factor [Source:RGD Symbol;Acc:1311894]
ENSRNOT00000001123.7	928	730.422	6357.58	85.9227	ENSRNOG00000000847.8	Csnk2b	casein kinase 2 beta [Source:RGD Symbol;Acc:619978]
ENSRNOT00000077553.1	243	84.0711	731	85.8341	ENSRNOG00000060359.1	AABR07032751.1
ENSRNOT00000029549.5	3578	3380.42	29375.1	85.7825	ENSRNOG00000001730.6	Acap2	ArfGAP with coiled-coil, ankyrin repeat and PH domains 2 [Source:RGD Symbol;Acc:1562939]
ENSRNOT00000050511.5	1093	895.422	7781	85.7822	ENSRNOG00000000186.7	Tst	thiosulfate sulfurtransferase [Source:RGD Symbol;Acc:3913]
ENSRNOT00000019978.3	1084	886.422	7702	85.7734	ENSRNOG00000014828.5	Avpi1	arginine vasopressin-induced 1 [Source:RGD Symbol;Acc:621721]
ENSRNOT00000074047.2	1541	1343.42	11665	85.716	ENSRNOG00000046848.2	PCOLCE2	procollagen C-endopeptidase enhancer 2 [Source:RGD Symbol;Acc:1595195]
ENSRNOT00000028210.5	1806	1608.42	13964	85.7037	ENSRNOG00000020791.5	Ube2q1	ubiquitin conjugating enzyme E2 Q1 [Source:RGD Symbol;Acc:1305305]
ENSRNOT00000017139.6	2022	1824.42	15838	85.6968	ENSRNOG00000012406.6	Pcbp4	poly(rC) binding protein 4 [Source:RGD Symbol;Acc:1307910]
ENSRNOT00000026224.2	974	776.422	6728.17	85.5439	ENSRNOG00000019302.3	Stx4	syntaxin 4 [Source:RGD Symbol;Acc:621019]
ENSRNOT00000022375.7	2757	2559.42	22178	85.5402	ENSRNOG00000016670.7	AABR07028769.1
ENSRNOT00000066062.3	3415	3217.42	27877.4	85.533	ENSRNOG00000019768.7	Ncoa4	nuclear receptor coactivator 4 [Source:RGD Symbol;Acc:1563014]
ENSRNOT00000001595.5	3639	3441.42	29808	85.5036	ENSRNOG00000001204.5	Ankrd13a	ankyrin repeat domain 13a [Source:RGD Symbol;Acc:1308577]
ENSRNOT00000074404.2	1831	1633.42	14145	85.4858	ENSRNOG00000048682.2	Zwint	ZW10 interacting kinetochore protein [Source:RGD Symbol;Acc:628671]
ENSRNOT00000027937.5	1519	1321.42	11442	85.4772	ENSRNOG00000037580.2	Psmd8	proteasome 26S subunit, non-ATPase 8 [Source:RGD Symbol;Acc:1309842]
ENSRNOT00000057807.3	2269	2071.42	17930.8	85.4518	ENSRNOG00000037998.3	Snw1	SNW domain containing 1 [Source:RGD Symbol;Acc:1561926]
ENSRNOT00000090381.1	1072	874.422	7566.28	85.4183	ENSRNOG00000007650.5	Cd63	Cd63 molecule [Source:RGD Symbol;Acc:62080]
ENSRNOT00000031026.4	1137	939.422	8127.07	85.401	ENSRNOG00000024410.4	Blvrb	biliverdin reductase B [Source:RGD Symbol;Acc:1306080]
ENSRNOT00000006407.4	1253	1055.42	9128	85.3767	ENSRNOG00000025792.4	Crk	CRK proto-oncogene, adaptor protein [Source:RGD Symbol;Acc:2405]
ENSRNOT00000023515.6	606	408.895	3532	85.2705	ENSRNOG00000017372.6	Higd2a	HIG1 hypoxia inducible domain family, member 2A [Source:RGD Symbol;Acc:1309691]
ENSRNOT00000087011.1	4788	4590.42	39636	85.2367	ENSRNOG00000059968.1	Jak2	Janus kinase 2 [Source:RGD Symbol;Acc:2939]
ENSRNOT00000025098.4	1242	1044.42	9016	85.2173	ENSRNOG00000018593.4	Txndc9	thioredoxin domain containing 9 [Source:RGD Symbol;Acc:708355]
ENSRNOT00000082672.1	7774	7576.42	65370.9	85.1745	ENSRNOG00000015396.7	Sptan1	spectrin, alpha, non-erythrocytic 1 [Source:RGD Symbol;Acc:621714]
ENSRNOT00000028149.7	4166	3968.42	34220	85.1239	ENSRNOG00000020730.7	Nbr1	NBR1, autophagy cargo receptor [Source:RGD Symbol;Acc:69195]
ENSRNOT00000012883.4	2726	2528.42	21799	85.1092	ENSRNOG00000009550.7	Sqle	squalene epoxidase [Source:RGD Symbol;Acc:3755]
ENSRNOT00000002738.5	2868	2670.42	23009	85.0565	ENSRNOG00000001989.6	Alcam	activated leukocyte cell adhesion molecule [Source:RGD Symbol;Acc:619972]
ENSRNOT00000030518.6	1486	1288.42	11094.9	85.0073	ENSRNOG00000026884.6	Snx17	sorting nexin 17 [Source:RGD Symbol;Acc:1306424]
ENSRNOT00000018122.5	1542	1344.42	11574	84.9841	ENSRNOG00000013201.5	Tex264	testis expressed 264 [Source:RGD Symbol;Acc:1359353]
ENSRNOT00000017101.6	1845	1647.42	14182.1	84.9816	ENSRNOG00000012786.7	Pgrmc1	progesterone receptor membrane component 1 [Source:RGD Symbol;Acc:70890]
ENSRNOT00000079231.1	666	468.631	4029.43	84.8794	ENSRNOG00000012786.7	Pgrmc1	progesterone receptor membrane component 1 [Source:RGD Symbol;Acc:70890]
ENSRNOT00000007607.5	1820	1622.42	13947	84.8607	ENSRNOG00000005610.6	Yipf4	Yip1 domain family, member 4 [Source:RGD Symbol;Acc:1310157]
ENSRNOT00000079095.1	1746	1548.42	13297.2	84.7739	ENSRNOG00000004685.7	Mta3	metastasis associated 1 family, member 3 [Source:RGD Symbol;Acc:1306803]
ENSRNOT00000091941.1	1441	1243.42	10675	84.7499	ENSRNOG00000055984.1	Adrm1	adhesion regulating molecule 1 [Source:RGD Symbol;Acc:69248]
ENSRNOT00000019594.4	1682	1484.42	12738	84.7098	ENSRNOG00000014462.4	Fnta	farnesyltransferase, CAAX box, alpha [Source:RGD Symbol;Acc:2625]
ENSRNOT00000092713.1	274	106.195	911	84.6845	ENSRNOG00000062039.1	AABR07044420.2
ENSRNOT00000001961.3	2438	2240.42	19208	84.6334	ENSRNOG00000001442.3	Por	cytochrome p450 oxidoreductase [Source:RGD Symbol;Acc:68335]
ENSRNOT00000012301.4	1036	838.422	7187	84.6203	ENSRNOG00000009217.4	Fbxo6	F-box protein 6 [Source:RGD Symbol;Acc:620418]
ENSRNOT00000011047.7	2073	1875.42	16053.2	84.4989	ENSRNOG00000007921.8	Hnrnpm	heterogeneous nuclear ribonucleoprotein M [Source:RGD Symbol;Acc:620369]
ENSRNOT00000011784.4	973	775.422	6636.68	84.4894	ENSRNOG00000008843.4	Eci1	enoyl-CoA delta isomerase 1 [Source:RGD Symbol;Acc:61892]
ENSRNOT00000054936.3	3628	3430.42	29354.5	84.4728	ENSRNOG00000036676.5	Csnk1d	casein kinase 1, delta [Source:RGD Symbol;Acc:71031]
ENSRNOT00000024576.3	1446	1248.42	10678	84.4342	ENSRNOG00000018212.5	Abhd17a	abhydrolase domain containing 17A [Source:RGD Symbol;Acc:1359682]
ENSRNOT00000011347.7	4122	3924.42	33546.3	84.3837	ENSRNOG00000008487.7	Amotl2	angiomotin like 2 [Source:RGD Symbol;Acc:70977]
ENSRNOT00000024707.7	3002	2804.42	23966.9	84.3642	ENSRNOG00000018279.7	Sfxn1	sideroflexin 1 [Source:RGD Symbol;Acc:1308482]
ENSRNOT00000019795.4	1672	1474.42	12593	84.3135	ENSRNOG00000014604.6	Sigmar1	sigma non-opioid intracellular receptor 1 [Source:RGD Symbol;Acc:68364]
ENSRNOT00000011069.6	1749	1551.42	13250	84.3093	ENSRNOG00000008063.6	Hibadh	3-hydroxyisobutyrate dehydrogenase [Source:RGD Symbol;Acc:708399]
ENSRNOT00000030031.4	2088	1890.42	16145	84.308	ENSRNOG00000022014.4	Rab35	RAB35, member RAS oncogene family [Source:RGD Symbol;Acc:1306362]
ENSRNOT00000017282.6	889	691.422	5904	84.2933	ENSRNOG00000012415.6	Mpc1	mitochondrial pyruvate carrier 1 [Source:RGD Symbol;Acc:620902]
ENSRNOT00000018114.5	2049	1851.42	15800.9	84.2492	ENSRNOG00000012771.5	Ddx41	DEAD-box helicase 41 [Source:RGD Symbol;Acc:1311758]
ENSRNOT00000056243.4	1531	1333.42	11380	84.2489	ENSRNOG00000037225.4	Tyms	thymidylate synthetase [Source:RGD Symbol;Acc:3921]
ENSRNOT00000008557.6	2647	2449.42	20879	84.1464	ENSRNOG00000006001.6	Luc7l2	LUC7-like 2 pre-mRNA splicing factor [Source:RGD Symbol;Acc:1308651]
ENSRNOT00000083806.1	1549	1351.42	11518.4	84.1379	ENSRNOG00000006987.6	Tmem263	transmembrane protein 263 [Source:RGD Symbol;Acc:1563325]
ENSRNOT00000017740.6	1392	1194.42	10177.4	84.1137	ENSRNOG00000013255.6	Dnajc8	DnaJ heat shock protein family (Hsp40) member C8 [Source:RGD Symbol;Acc:1306024]
ENSRNOT00000050061.5	1921	1723.42	14684	84.109	ENSRNOG00000032492.5	Usp22	ubiquitin specific peptidase 22 [Source:RGD Symbol;Acc:1310354]
ENSRNOT00000004969.6	2917	2719.42	23162	84.0793	ENSRNOG00000003703.6	Mcm6	minichromosome maintenance complex component 6 [Source:RGD Symbol;Acc:61967]
ENSRNOT00000012634.6	2170	1972.42	16792.2	84.0424	ENSRNOG00000009437.7	Ewsr1	EWS RNA-binding protein 1 [Source:RGD Symbol;Acc:1307258]
ENSRNOT00000014388.7	4196	3998.42	34037	84.0335	ENSRNOG00000010841.7	Col8a2	collagen type VIII alpha 2 chain [Source:RGD Symbol;Acc:1305182]
ENSRNOT00000004917.5	1587	1389.42	11818	83.9652	ENSRNOG00000003653.5	Fh	fumarate hydratase [Source:RGD Symbol;Acc:2614]
ENSRNOT00000039572.3	1296	1098.42	9340	83.9397	ENSRNOG00000023079.3	Nras	NRAS proto-oncogene, GTPase [Source:RGD Symbol;Acc:3205]
ENSRNOT00000073107.1	378	191.492	1628.21	83.9364	ENSRNOG00000050560.1	Polr2i	RNA polymerase II subunit I [Source:RGD Symbol;Acc:1309395]
ENSRNOT00000016376.5	4387	4189.42	35592.3	83.8671	ENSRNOG00000011945.7	Cyfip1	cytoplasmic FMR1 interacting protein 1 [Source:RGD Symbol;Acc:1310332]
ENSRNOT00000024568.5	4168	3970.42	33722.1	83.8431	ENSRNOG00000018149.5	Smarca5	SWI/SNF related, matrix associated, actin dependent regulator of chromatin, subfamily a, member 5 [Source:RGD Symbol;Acc:1308832]
ENSRNOT00000006264.4	2288	2090.42	17742	83.7835	ENSRNOG00000004516.5	Itgbl1	integrin subunit beta like 1 [Source:RGD Symbol;Acc:1560635]
ENSRNOT00000007859.5	1979	1781.42	15104.1	83.6983	ENSRNOG00000050849.2	Leprot	leptin receptor overlapping transcript [Source:RGD Symbol;Acc:621034]
ENSRNOT00000077362.1	1594	1396.42	11829.3	83.624	ENSRNOG00000014154.7	Ilf2	interleukin enhancer binding factor 2 [Source:RGD Symbol;Acc:1305734]
ENSRNOT00000027585.2	540	343.895	2913	83.619	ENSRNOG00000020354.2	Mrpl23	mitochondrial ribosomal protein L23 [Source:RGD Symbol;Acc:68343]
ENSRNOT00000021096.6	1779	1581.42	13390	83.5839	ENSRNOG00000042195.3	Pabpn1	poly(A) binding protein, nuclear 1 [Source:RGD Symbol;Acc:619928]
ENSRNOT00000042316.5	1218	1020.42	8631	83.497	ENSRNOG00000028774.5	Vgll3	vestigial-like family member 3 [Source:RGD Symbol;Acc:1560030]
ENSRNOT00000028807.7	1486	1288.42	10897	83.4908	ENSRNOG00000021215.7	Rbm8a	RNA binding motif protein 8A [Source:RGD Symbol;Acc:1310099]
ENSRNOT00000006884.5	2156	1958.42	16545	83.3969	ENSRNOG00000005083.5	Rtfdc1	replication termination factor 2 domain containing 1 [Source:RGD Symbol;Acc:1311072]
ENSRNOT00000037120.5	936	738.422	6233.3	83.3303	ENSRNOG00000013802.8	Slc25a36	solute carrier family 25 member 36 [Source:RGD Symbol;Acc:1591928]
ENSRNOT00000037883.4	2784	2586.42	21807	83.2312	ENSRNOG00000013265.6	Tgfbr2	transforming growth factor, beta receptor 2 [Source:RGD Symbol;Acc:69651]
ENSRNOT00000027351.7	1758	1560.42	13155	83.2221	ENSRNOG00000020179.7	Nt5c2	5'-nucleotidase, cytosolic II [Source:RGD Symbol;Acc:2323387]
ENSRNOT00000034400.3	2075	1877.42	15817	83.1672	ENSRNOG00000014945.5	Kpna3	karyopherin subunit alpha 3 [Source:RGD Symbol;Acc:1311339]
ENSRNOT00000014153.7	2176	1978.42	16665.8	83.1566	ENSRNOG00000010635.7	Igfbp4	insulin-like growth factor binding protein 4 [Source:RGD Symbol;Acc:2875]
ENSRNOT00000079483.1	1812	1614.42	13595.7	83.1334	ENSRNOG00000018468.7	Ldb1	LIM domain binding 1 [Source:RGD Symbol;Acc:1310359]
ENSRNOT00000004315.7	1852	1654.42	13932	83.1298	ENSRNOG00000027380.6	Upk1b	uroplakin 1B [Source:RGD Symbol;Acc:1307806]
ENSRNOT00000045311.4	1839	1641.42	13818	83.1026	ENSRNOG00000009282.7	Nub1	negative regulator of ubiquitin-like proteins 1 [Source:RGD Symbol;Acc:1359489]
ENSRNOT00000075725.2	570	373.316	3142	83.0844	ENSRNOG00000047934.2	RGD1566359	similar to RIKEN cDNA B230219D22 [Source:RGD Symbol;Acc:1566359]
ENSRNOT00000024487.4	2003	1805.42	15193.2	83.0732	ENSRNOG00000018181.4	Stk25	serine/threonine kinase 25 [Source:RGD Symbol;Acc:727809]
ENSRNOT00000031007.6	1963	1765.42	14855	83.0642	ENSRNOG00000027514.6	Ube2m	ubiquitin-conjugating enzyme E2M [Source:RGD Symbol;Acc:1307614]
ENSRNOT00000023861.6	3337	3139.42	26416	83.0629	ENSRNOG00000017466.6	Kif5b	kinesin family member 5B [Source:RGD Symbol;Acc:621559]
ENSRNOT00000021646.5	2621	2423.42	20346.6	82.8803	ENSRNOG00000015840.7	Hsd17b4	hydroxysteroid (17-beta) dehydrogenase 4 [Source:RGD Symbol;Acc:621806]
ENSRNOT00000074938.1	2130	1932.42	16221	82.8639	ENSRNOG00000050570.1	Nrbp1	nuclear receptor binding protein 1 [Source:RGD Symbol;Acc:1589575]
ENSRNOT00000028589.4	1404	1206.42	10120	82.8077	ENSRNOG00000021042.6	Psmd4	proteasome 26S subunit, non-ATPase 4 [Source:RGD Symbol;Acc:621109]
ENSRNOT00000022194.7	1788	1590.42	13340	82.8004	ENSRNOG00000033772.5	Serpinb9	serpin family B member 9 [Source:RGD Symbol;Acc:1549730]
ENSRNOT00000040771.4	315	138.365	1159.51	82.7254	ENSRNOG00000030291.4	AC095947.1
ENSRNOT00000071853.2	1657	1459.42	12219.2	82.6518	ENSRNOG00000050404.2	Pmepa1	prostate transmembrane protein, androgen induced 1 [Source:RGD Symbol;Acc:1308255]
ENSRNOT00000084389.1	435	243.322	2037	82.6416	ENSRNOG00000061844.1	AABR07005618.1
ENSRNOT00000017375.7	2295	2097.42	17549	82.5955	ENSRNOG00000012378.7	Dbnl	drebrin-like [Source:RGD Symbol;Acc:70941]
ENSRNOT00000006708.4	1781	1583.42	13248	82.593	ENSRNOG00000005024.4	Cdkn2aipnl	CDKN2A interacting protein N-terminal like [Source:RGD Symbol;Acc:1308696]
ENSRNOT00000012875.6	2463	2265.42	18927.4	82.4768	ENSRNOG00000009019.6	Slc6a6	solute carrier family 6 member 6 [Source:RGD Symbol;Acc:61912]
ENSRNOT00000079824.1	3669	3471.42	28985.8	82.4265	ENSRNOG00000056756.1	Actn1	actinin, alpha 1 [Source:RGD Symbol;Acc:70907]
ENSRNOT00000041277.5	2704	2506.42	20921.1	82.3988	ENSRNOG00000010448.9	Ptbp1	polypyrimidine tract binding protein 1 [Source:RGD Symbol;Acc:62047]
ENSRNOT00000010448.7	1042	844.422	7043	82.3356	ENSRNOG00000007845.7	Supt4h1	SPT4 homolog, DSIF elongation factor subunit [Source:RGD Symbol;Acc:1306372]
ENSRNOT00000039291.5	1927	1729.42	14412	82.2646	ENSRNOG00000028105.5	Hars1	histidyl-tRNA synthetase 1 [Source:RGD Symbol;Acc:1310695]
ENSRNOT00000026595.5	3004	2806.42	23387	82.2643	ENSRNOG00000019529.5	Btbd1	BTB domain containing 1 [Source:RGD Symbol;Acc:1310962]
ENSRNOT00000003277.4	3845	3647.42	30386	82.2389	ENSRNOG00000002301.6	Uso1	USO1 vesicle transport factor [Source:RGD Symbol;Acc:621604]
ENSRNOT00000086175.1	1346	1148.42	9567	82.2364	ENSRNOG00000000893.6	Tmem248	transmembrane protein 248 [Source:RGD Symbol;Acc:1303319]
ENSRNOT00000086275.1	1484	1286.42	10712	82.2009	ENSRNOG00000055111.1	AABR07000658.2	cyclin B2-like [Source:NCBI gene;Acc:100364016]
ENSRNOT00000029493.6	2814	2616.42	21778	82.1675	ENSRNOG00000027622.6	Slc35e3	solute carrier family 35, member E3 [Source:RGD Symbol;Acc:1564876]
ENSRNOT00000024779.6	2458	2260.42	18803	82.1159	ENSRNOG00000018255.6	Clptm1	CLPTM1 regulator of GABA type A receptor forward trafficking [Source:RGD Symbol;Acc:1310959]
ENSRNOT00000011855.5	1348	1150.42	9565.16	82.0776	ENSRNOG00000008490.5	Cwc15	CWC15 spliceosome-associated protein [Source:RGD Symbol;Acc:1310669]
ENSRNOT00000018583.3	3190	2992.42	24879.3	82.0739	ENSRNOG00000013581.3	Extl3	exostosin-like glycosyltransferase 3 [Source:RGD Symbol;Acc:62065]
ENSRNOT00000025763.6	2542	2344.42	19478.9	82.0196	ENSRNOG00000019018.6	Plat	plasminogen activator, tissue type [Source:RGD Symbol;Acc:3342]
ENSRNOT00000027425.7	2185	1987.42	16511.2	82.0121	ENSRNOG00000020235.8	Hnrnpl	heterogeneous nuclear ribonucleoprotein L [Source:RGD Symbol;Acc:71059]
ENSRNOT00000073157.1	465	271.453	2255	82.0051	ENSRNOG00000050051.1	Pin4	peptidylprolyl cis/trans isomerase, NIMA-interacting 4 [Source:RGD Symbol;Acc:1590326]
ENSRNOT00000011408.7	1893	1695.42	14081	81.9871	ENSRNOG00000007920.7	Ssbp3	single stranded DNA binding protein 3 [Source:RGD Symbol;Acc:621502]
ENSRNOT00000017338.5	3413	3215.42	26701.4	81.9758	ENSRNOG00000012826.5	Creb3l2	cAMP responsive element binding protein 3-like 2 [Source:RGD Symbol;Acc:1306040]
ENSRNOT00000005190.4	654	456.649	3791	81.9522	ENSRNOG00000003833.4	Nenf	neudesin neurotrophic factor [Source:RGD Symbol;Acc:1303289]
ENSRNOT00000020373.5	1377	1179.42	9783	81.8828	ENSRNOG00000015122.6	Tpd52l2	TPD52 like 2 [Source:RGD Symbol;Acc:735167]
[truncated: 29,717 more rows]
